# Supplementary material for: Thoroughly Calibrated Modular Agent-Based Model of the Human Cardiovascular and Renal Systems for Blood Pressure Regulation in Health and Disease
Source: PubMed Central journal article supplement (PMC8632703; doi:10.3389/fphys.2021.746300), 2021-11-11
Supplement: Data_Sheet_1.pdf [file Data_Sheet_1.pdf]

## APPENDIX A. DESCRIPTION OF THE MODEL OF THE HUMAN CARDIOVASCULAR AND RENAL SYSTEMS

**Table A1.** List of the model mathematical functions.

| Functions                                                                                                                                                                       | Description                                                                                                                                                                                                                                                                                                                                                                                                                                                                          |
|---------------------------------------------------------------------------------------------------------------------------------------------------------------------------------|--------------------------------------------------------------------------------------------------------------------------------------------------------------------------------------------------------------------------------------------------------------------------------------------------------------------------------------------------------------------------------------------------------------------------------------------------------------------------------------|
| $mass_{elasticity}(e, m) = \frac{29.97 \cdot e}{m^{0.75}}$                                                                                                                      | Allometric scaling formula for calculating wall elasticity of six compartments of the circulatory system depending on the body weight $m$ and the average normal elasticity value $e$ taking into account the allometric index -0.75.                                                                                                                                                                                                                                                |
| $mass_{volume}(v, m) = \frac{m}{70} \cdot v$                                                                                                                                    | Formula for allometric scaling relative to the body weight $m$ taking into account the average human value of 70 kg. It is used to calculate the theoretical maximum stroke volume $SV_{max}$ , the Frank-Starling law threshold $FS_{threshold}$ and the body oxygen demand $RO_2$ .                                                                                                                                                                                                |
| $mass_{conductivity}(c, m) = 0.042 \cdot m^{0.75} \cdot c$                                                                                                                      | Allometric scaling formula for calculating conductivity of individual sections of the vascular bed depending on the body weight $m$ and the average normal value $c$ taking into account the allometric index 0.75.                                                                                                                                                                                                                                                                  |
| $r_{plus}(a, b, x, x_0) = \frac{1 - e^{-a(x-x_0)}}{1 + b \cdot e^{-a(x-x_0)}}$                                                                                                  | Sigmoid function of receptor activity of the fatigue factor ( $nD$ ), the stress factor ( $nS$ ), and the neurohumoral factor ( $H$ ).                                                                                                                                                                                                                                                                                                                                               |
| $r_{minus}(a, b, x, x_0) = 1 - r_{plus}(a, b, x, x_0)$                                                                                                                          | Activity function of respiratory center receptors ( $nV$ ) and baroreceptors ( $nB$ ).                                                                                                                                                                                                                                                                                                                                                                                               |
| $atrium_{pulse}(T, T_s, P_{AL}, t) = \begin{cases} 0, & t \leq T - 0.2 \cdot (T - T_s) \\ 0.1 \cdot P_{AL} \cdot  T - t ^{1/2}, & else \end{cases}$                             | The function for calculating values of pulse waves of the left and right atria based on the duration of cycle $T$ , actual duration of the left or right ventricular systole $T_s$ , pressure in the systemic arteries $P_{AL}$ and the current time of the cardiac cycle $t$ .                                                                                                                                                                                                      |
| $valve(P_{in}, P_{out}, R_{factor}, YY) = \begin{cases} YY \cdot (P_{in} - P_{out}), & P_{in} \geq P_{out} \\ R_{factor} \cdot YY \cdot (P_{in} - P_{out}), & else \end{cases}$ | The function for calculating an amount of blood flow through heart valves (aortic, tricuspid, pulmonary and mitral) taking into account the inlet pressure $P_{in}$ , outlet pressure $P_{out}$ , conductivity $YY$ and regurgitation coefficient $R_{factor}$ . The second part of the formula describes the reverse blood flow through a valve (regurgitation) in the case of a defect in the locking element ( $0 < R_{factor} < 0.3$ ). In normal conditions, $R_{factor} = 0$ . |
| $sigm(x) = \frac{1}{1 + e^{-x}}$                                                                                                                                                | Logistic function.                                                                                                                                                                                                                                                                                                                                                                                                                                                                   |
| $sgn(x, y) = \begin{cases} 0, & x \leq 0 \text{ u } y \leq 0 \\ y, & else \end{cases}$                                                                                          | The function for calculating the oxygen debt level.                                                                                                                                                                                                                                                                                                                                                                                                                                  |

**Table A2.** List of the model equations divided into 20 modules.

| №                          | Equations                                                                                                                                                                                                                                                                                             | Description                                                                                                                                                                                                                                                                                                                                                                                                                                                                                                                                                                                                                                                      | Ref                            |
|----------------------------|-------------------------------------------------------------------------------------------------------------------------------------------------------------------------------------------------------------------------------------------------------------------------------------------------------|------------------------------------------------------------------------------------------------------------------------------------------------------------------------------------------------------------------------------------------------------------------------------------------------------------------------------------------------------------------------------------------------------------------------------------------------------------------------------------------------------------------------------------------------------------------------------------------------------------------------------------------------------------------|--------------------------------|
| <b>Left ventricle (LV)</b> |                                                                                                                                                                                                                                                                                                       |                                                                                                                                                                                                                                                                                                                                                                                                                                                                                                                                                                                                                                                                  |                                |
| 001                        | $\frac{dV_{HL}}{dt} = F_{VRHL} - F_{HLAL}$                                                                                                                                                                                                                                                            | Change in blood volume in the LV due to the difference between the input blood flow $F_{VRHL}$ and the output blood flow $F_{HLAL}$ .                                                                                                                                                                                                                                                                                                                                                                                                                                                                                                                            | Proshin                        |
| 002                        | $V_{HL}(0) = 0.03 \cdot V$                                                                                                                                                                                                                                                                            | Starting value <sup>1</sup> of blood volume in the LV is 3% of the total blood volume $V$ (systemic circulation – 84% [Hall], pulmonary – 10% [Gazioglu], and values $V_{HL}(0)$ and $V_{HR}(0)$ are assumed to be equal).                                                                                                                                                                                                                                                                                                                                                                                                                                       | Hall<br>Gazioglu               |
| 003                        | $K_L = K_{L0} + 0.25 \cdot nH \cdot \text{sigm}(20 \cdot (K_{L0} - 0.4)) - 0.25 \cdot nH \cdot \text{sigm}(20 \cdot (K_{L0} - 0.7))$                                                                                                                                                                  | Inotropic factor of the LV. Numerical characteristic of the myocardial inotropism (contractility). $K_{L0}$ – inotropic status of the LV. $nH$ – myocardial sympathetic inotropic sensitivity.                                                                                                                                                                                                                                                                                                                                                                                                                                                                   | Proshin                        |
| 004                        | $\omega_{HL}(0) = k_{HL} \cdot V_{HL}$                                                                                                                                                                                                                                                                | Unstressed LV volume – the LV volume at zero diastolic pressure [S-D] <sup>2</sup> , calculated as a fraction $k_{HL}$ of $V_{HL}$ .                                                                                                                                                                                                                                                                                                                                                                                                                                                                                                                             | –                              |
| 005                        | $FS_{threshold}(0) = \text{mass}_{volume}(FS_{threshold0}, m)$                                                                                                                                                                                                                                        | The Frank-Starling law threshold $FS_{threshold}$ is the normal average value $FS_{threshold0}$ normalized to the body weight $m$ .                                                                                                                                                                                                                                                                                                                                                                                                                                                                                                                              | Proshin <sup>3</sup><br>MATLAB |
| 006                        | $SV_{max}(0) = \text{mass}_{volume}(SV_{max0}, m)$                                                                                                                                                                                                                                                    | Theoretical maximum of the VL stroke volume $SV_{max}$ is the average value $SV_{max0}$ normalized to the body weight $m$ .                                                                                                                                                                                                                                                                                                                                                                                                                                                                                                                                      | Proshin<br>MATLAB              |
| 007                        | If:<br>$Cycle_{Time} \geq Cycle_{Length}$<br>Then:<br>1. $Cycle_{Length} = \frac{1}{H}$<br>2. $Cycle_{Time} = 0$<br>3. $V_{HL\_KD} = V_{HL}$<br>4. $SV = K_L \cdot SV_{max} \cdot [\text{sigm}(0.03 \cdot (V_{HL} - FS_{threshold} - 80)) - \text{sigm}(0.03 \cdot (V_{HL} - FS_{threshold} - 260))]$ | Transition "diastole – systole". A discrete event determined by the instantaneous change of the LV parameters at the beginning of the cardiac cycle. The event is triggered when a current cycle time $Cycle_{Time}$ reaches a cycle length $Cycle_{Length}$ .<br>1. $Cycle_{Length}$ – a value inversely proportional to the value of the neurohumoral factor $H$ .<br>2. Starting a new cycle corresponds to the zeroing $Cycle_{Time}$ .<br>3. $V_{HL\_KD}$ – the LV blood volume at the end of diastole.<br>4. The LV stroke volume $SV$ is defined as the product of the inotropic factor $K_L$ , theoretical maximum $SV_{max}$ and value of a bell-shaped | Proshin<br>MATLAB              |

<sup>1</sup> Formulas for calculating starting values of variables are used to reconcile them in the case of changing the initial parameter values, for example, during generation of a virtual patient. When we consider the model in equilibrium, these formulas are not taken into account.

<sup>2</sup> Here and below, the reference "S-D" means the educational resource: <http://www.samara-dialog.ru/help/eng/help.htm>.

<sup>3</sup> Mention of MATLAB hereinafter means that the detailed formula is not available in open sources and is taken from the Proshin and Solodyannikov model implementation in MATLAB obtained in correspondence with the authors.

|     |                                                                                                                                                                                                                                                                                                                                                                                                                                                                                                                                                 |                                                                                                                                                                                                                                                                                                                                                                                                                                                                                                                                                                                                                                                                                                                                                                                                                                                                                                                                                                                                                                                                                    |                   |
|-----|-------------------------------------------------------------------------------------------------------------------------------------------------------------------------------------------------------------------------------------------------------------------------------------------------------------------------------------------------------------------------------------------------------------------------------------------------------------------------------------------------------------------------------------------------|------------------------------------------------------------------------------------------------------------------------------------------------------------------------------------------------------------------------------------------------------------------------------------------------------------------------------------------------------------------------------------------------------------------------------------------------------------------------------------------------------------------------------------------------------------------------------------------------------------------------------------------------------------------------------------------------------------------------------------------------------------------------------------------------------------------------------------------------------------------------------------------------------------------------------------------------------------------------------------------------------------------------------------------------------------------------------------|-------------------|
|     | <p>5. <math>V_{HL\_KS} = V_{HL} - K_L \cdot SV_{\max} \cdot</math><br/> <math>\cdot \left[ \text{sigm}(0.03 \cdot (V_{HL} - FS_{\text{threshold}} - 80)) - \right.</math><br/> <math>\left. - \text{sigm}(0.03 \cdot (V_{HL} - FS_{\text{threshold}} - 260)) \right]</math></p> <p>6. <math>Systole_{\text{Length\_L\_Exp}} = \frac{0.25}{H} + 0.2 \cdot (1 - K_L)</math></p> <p>7. <math>Systole_{\text{Length\_L}} = \frac{0.25}{H} + 0.2 \cdot (1 - K_L)</math></p> <p>8. <math>Systole_L = 1</math></p> <p>9. <math>P_D = P_{AL}</math></p> | <p>function, which is equal to the difference of two logistic functions, depending on <math>V_{HL} = V_{HL\_KD}</math> and threshold of the Frank-Starling law <math>FS_{\text{threshold}}</math>.</p> <p>5. End systolic volume of the LV <math>V_{HL\_KS}</math> is equal to the difference between <math>V_{HL} = V_{HL\_KD}</math> and <math>SV</math>.</p> <p>6. <math>Systole_{\text{Length\_L\_Exp}}</math> – the nominal duration of the LV systole.</p> <p>7. <math>Systole_{\text{Length\_L}}</math> – the actual duration of the LV systole. It changes value at the transition "LV systole – LV diastole" resulting in a possible mismatch between <math>Systole_{\text{Length\_L\_Exp}}</math> and <math>Systole_{\text{Length\_L}}</math>.</p> <p>8. <math>Systole_L</math> – indicator of the actual LV systole equals 1 when <math>Systole_{\text{Length\_L\_Exp}}</math> and <math>Systole_{\text{Length\_L}}</math> are matched.</p> <p>9. Diastolic pressure <math>P_D</math> is the systemic arterial pressure <math>P_{AL}</math> at the end of diastole.</p> |                   |
| 008 | <p>If: <math>Systole = 1</math><br/> Then: <math>F_{HLAL\_p} = F_{HLAL}</math></p>                                                                                                                                                                                                                                                                                                                                                                                                                                                              | <p>Systole start. Discrete event triggered after the transition "diastole – systole" (<math>Systole = 1</math>). At this point, blood flow through the aortic valve <math>F_{HLAL}</math> reaches its peak <math>F_{HLAL\_p}</math>.</p>                                                                                                                                                                                                                                                                                                                                                                                                                                                                                                                                                                                                                                                                                                                                                                                                                                           | –                 |
| 009 | <p>If:<br/> <math>V_{HL} &lt; V_{HL\_KS}</math> and <math>Systole_L = 1</math>,<br/> Then:<br/> 1. <math>Systole_L = 0</math><br/> 2. <math>Systole_{\text{Length\_L}} = Cycle_{\text{Time}}</math><br/> 3. <math>P_S = P_{AL}</math></p>                                                                                                                                                                                                                                                                                                       | <p>Transition "LV systole – LV diastole". A discrete event set by the instantaneous change of the LV parameters at the moment of switching the LV from systole to diastole. It fires when the LV volume <math>V_{HL}</math> reaches the LV end-systolic volume <math>V_{HL\_KS}</math> in condition: the LV is in a systolic state.</p> <ol style="list-style-type: none"> <li><math>Systole_L = 0</math>, that is, the LV is in the state of diastole.</li> <li>Actual duration of the LV systole <math>Systole_{\text{Length\_L}}</math> corresponds to the transition time from diastole to systole.</li> <li><math>P_S</math> – blood pressure in the systemic arteries <math>P_{AL}</math> at the end of systole.</li> </ol>                                                                                                                                                                                                                                                                                                                                                  | Proshin<br>MATLAB |
| 010 | <p>If:<br/> <math>P_{VR} &gt; P_{HL}</math><br/> Then:<br/> <math>F_{VRHL\_ep} = F_{VRHL}</math></p>                                                                                                                                                                                                                                                                                                                                                                                                                                            | <p>Mitral valve opening. A discrete event triggered at the moment of the LV transition to diastole, when the pressure in pulmonary veins <math>P_{VR}</math> becomes greater than the pressure in the LV <math>P_{HL}</math>. In normal subjects, the LV filling rate reaches its highest value (early peak) <math>F_{VRHL\_ep}</math> immediately after valve opening [Caudron].</p>                                                                                                                                                                                                                                                                                                                                                                                                                                                                                                                                                                                                                                                                                              | –                 |

|     |                                                                                                             |                                                                                                                                                                                                                                                                                                                                                                                |                              |
|-----|-------------------------------------------------------------------------------------------------------------|--------------------------------------------------------------------------------------------------------------------------------------------------------------------------------------------------------------------------------------------------------------------------------------------------------------------------------------------------------------------------------|------------------------------|
| 011 | $P_{HL\_D} = mass_{elasticity}(G_{HL}, m) \cdot (V_{HL} - \omega_{HL})$                                     | Diastolic pressure in the LV $P_{HL\_D}$ depends on the blood volume $V_{HL}$ , unstressed volume $\omega_{HL}$ and the LV wall elasticity $G_{HL}$ (characterizing stiffness of the LV wall in the phase of its relaxation). The allometric scaling formula for $G_{HL}$ is taken from the MATLAB implementation of the model by Proshin and Solodyannikov.                   | Ottesen <sup>4</sup><br>Suga |
| 012 | $Systole_{L\_Exp} = \begin{cases} 0, & Cycle_{Time} \geq Systole_{Length\_L\_Exp} \\ 1, & else \end{cases}$ | Nominal LV systole indicator.                                                                                                                                                                                                                                                                                                                                                  | Proshin<br>MATLAB            |
| 013 | $DTS_L = Systole_L - Systole_{L\_Exp}$                                                                      | LV systolic mismatch.                                                                                                                                                                                                                                                                                                                                                          | Proshin<br>MATLAB            |
| 014 | $\frac{dCycle_{Time}}{dt} = 1$                                                                              | Mapping time of the current cardiac cycle $Cycle_{Time}$ to a model time of the LV module.                                                                                                                                                                                                                                                                                     | –                            |
| 015 | $\frac{dP_{HL\_S}}{dt} = A_5 \cdot DTS_L$                                                                   | LV systolic pressure $P_{HL\_S}$ depending on a magnitude of mismatch $DTS_L$ and sensitivity coefficient $A_5$ .                                                                                                                                                                                                                                                              | Proshin<br>MATLAB            |
| 016 | $P_{HL} = (Systole - Systole_L) \cdot P_{AL} + (1 - Systole) \cdot P_{HL\_D} + P_{HL\_S} \cdot Systole_L$   | LV blood pressure $P_{HL}$ :<br>$P_{HL} = P_{HL\_S}$ , if the LV is in the state of systole;<br>$P_{HL} = P_{AL}$ , if the LV is in the state of diastole, and the RV is in the state of systole;<br>$P_{HL} = P_{HL\_D}$ , if both the LV and the RV are in the state of diastole.                                                                                            | Proshin<br>MATLAB            |
| 017 | $Y_{VRHL} = mass_{conductivity}(Y_{VRHL0} + A_{16} \cdot P_{VR}, m)$                                        | Conductivity of the mitral valve and pulmonary veins $Y_{VRHL}$ is the inverse of resistance to blood flow in the specified section of the bloodstream. The value of $Y_{VRHL}$ is calculated according to the allometric law depending on the body weight $m$ . $Y_{VRHL0}$ – basic conductivity.<br>$P_{VR}$ – pulmonary vein and left atrial pressure. $A_{16}$ – constant. | Proshin<br>MATLAB            |

<sup>4</sup> In the work [Ottesen], when describing the model of a pumping heart, the unified formula for relation between left ventricular cavity pressure  $p_{lv}$  and ventricular volume  $V_{lv}$  is given by:  $p_{lv} = E_{lv}(t) \cdot (V_{lv} - V_{d,lv})$ , where  $V_{d,lv}$  is the LV volume at  $p_{lv} = 0$ , and the elasticity function  $E_{lv}(t)$  remains constant and takes the minimum value during diastolic filling of the LV. In the MATLAB implementation of the model by Proshin and Solodyannikov, the value  $P_{HL\_D}$  is calculated taking into account residual pressure in the LV  $P_{HL0}$  as a quadratic function:  $P_{HL\_D} = P_{HL0} + mass_{elasticity}(G_{HL}, m) \cdot (V_{HL} - \omega_{HL})^2$ . In addition, exponential and logarithmic functions [Zhang, 2008], cubic and power functions [Burkhoff] can be used to model the variable  $P_{HL\_D}$  corresponding to the end-diastolic pressure-volume relationship (EDPVR).

|     |                                                                                                                                 |                                                                                                                                                                                                                                                                                                                                                                                                                                                                                                                                                                                                                        |                   |
|-----|---------------------------------------------------------------------------------------------------------------------------------|------------------------------------------------------------------------------------------------------------------------------------------------------------------------------------------------------------------------------------------------------------------------------------------------------------------------------------------------------------------------------------------------------------------------------------------------------------------------------------------------------------------------------------------------------------------------------------------------------------------------|-------------------|
| 018 | $F_{VRHL} = valve(P_{VR}, P_{HL}, K_{VRHL}, Y_{VRHL})$                                                                          | Amount of blood flow through the mitral valve $F_{VRHL}$ is characterized by the difference between pressure in the pulmonary vein and the left atrium $P_{VR}$ and pressure in the LV $P_{HL}$ .<br>$Y_{VRHL}$ – conductivity of the mitral valve and pulmonary veins.<br>$K_{VRHL}$ – regurgitation coefficient describes the mitral valve closing function failure that leads to the reverse blood flow from the LV into the left atrium and pulmonary vein in the systole phase in conditions of the valve defect.                                                                                                 | S-D               |
| 019 | $F_{HLAL} = valve(P_{HL}, P_{AL}, K_{HLAL}, mass_{conductivity}(Y_{HLAL}, m))$                                                  | Amount of blood flow through the aortic valve $F_{HLAL}$ is characterized by the difference between pressure in the LV $P_{HL}$ and pressure in the upper part of the arterial bed (the aorta and large arterial vessels extending from it) $P_{AL}$ .<br>$Y_{HLAL}$ – conductivity of the aortic valve and systemic arteries taken with the allometric scaling relative to the body weight $m$ .<br>$K_{HLAL}$ – regurgitation coefficient describes the aortic valve closing function failure that leads to the reverse blood flow from the aorta to the LV in the diastole phase in conditions of the valve defect. | S-D               |
| 020 | $LA_{PULSE} = atrium_{pulse}(Cycle_{Length}, Systole_{Length\_L}, P_{AL}, Cycle_{Time})$                                        | Left atrial pulse wave depends on the cycle length $Cycle_{Length}$ , actual duration of the LV systole $Systole_{Length\_L}$ , blood pressure $P_{AL}$ , and current cycle time $Cycle_{Time}$ .                                                                                                                                                                                                                                                                                                                                                                                                                      | Proshin<br>MATLAB |
| 021 | If:<br>$Cycle_{Time} > Cycle_{Length} - 0.2 \cdot (Cycle_{Length} - Systole_{Length\_L})$<br>Then:<br>$F_{VRHL\_ap} = F_{VRHL}$ | A discrete event that defines the active peak $F_{VRHL\_ap}$ in blood flow through the mitral valve $F_{VRHL}$ . This peak is achieved with left atrial contraction [Caudron] at the time when $LA_{PULSE}$ becomes positive.                                                                                                                                                                                                                                                                                                                                                                                          | –                 |
| 022 | $MAP = \frac{P_S + 2 \cdot P_D}{3}$                                                                                             | Mean arterial pressure $MAP$ depends on systolic blood pressure $P_S$ and diastolic blood pressure $P_D$ .                                                                                                                                                                                                                                                                                                                                                                                                                                                                                                             | Moran             |
| 023 | $Heart_{Rate} = \frac{60}{Cycle_{Length}}$                                                                                      | Length of the cardiac cycle $Cycle_{Length}$ , by definition, corresponds to the time of one heartbeat. Heart rate $Heart_{Rate}$ is the number of heart beats per minute.                                                                                                                                                                                                                                                                                                                                                                                                                                             | –                 |
| 024 | $CO = \frac{SV \cdot Heart_{Rate}}{1000}$                                                                                       | Cardiac output $CO$ (l/min) is equal to the product of stroke volume $SV$ (ml) and $Heart_{Rate}$ (bpm).                                                                                                                                                                                                                                                                                                                                                                                                                                                                                                               | Cattermole        |

|                          |                                                                                                                                                                                                                                                                                                                                                                                                                             |                                                                                                                                                                                                                                                                                                                                                          |                    |
|--------------------------|-----------------------------------------------------------------------------------------------------------------------------------------------------------------------------------------------------------------------------------------------------------------------------------------------------------------------------------------------------------------------------------------------------------------------------|----------------------------------------------------------------------------------------------------------------------------------------------------------------------------------------------------------------------------------------------------------------------------------------------------------------------------------------------------------|--------------------|
| 025                      | $TPR = MAP/CO$                                                                                                                                                                                                                                                                                                                                                                                                              | Total peripheral resistance $TPR$ is the ratio of mean arterial pressure $MAP$ to cardiac output $CO$ .                                                                                                                                                                                                                                                  | Cattermole<br>Daly |
| 026                      | $EF = \frac{SV}{V_{HL\_KD}} \cdot 100$                                                                                                                                                                                                                                                                                                                                                                                      | Ejection fraction ( $EF$ ) is stroke volume $SV$ divided by the LV end-diastolic volume $V_{HL\_KD}$ and multiplied by 100%.                                                                                                                                                                                                                             | Maceira<br>2006a   |
| 027                      | $V_{HL\_KS}(0) = V_{HL\_KD} - K_L \cdot SV_{\max} \cdot \left[ \text{sigm}\left(0.03 \cdot (V_{HL\_KD} - FS_{\text{threshold}} - 80)\right) - \text{sigm}\left(0.03 \cdot (V_{HL\_KD} - FS_{\text{threshold}} - 260)\right) \right]$ $Systole_{\text{Length\_L\_Exp}}(0) = 0.25 \cdot Cycle_{\text{Length}} + 0.2 \cdot (1 - K_L)$ $Systole_{\text{Length\_L}}(0) = 0.25 \cdot Cycle_{\text{Length}} + 0.2 \cdot (1 - K_L)$ | Initialization of parameters according to the implementation of the model by Proshin and Solodyannikov in MATLAB received from the authors. See equation group 007 for explanation.                                                                                                                                                                      | Proshin<br>MATLAB  |
| <b>Systemic arteries</b> |                                                                                                                                                                                                                                                                                                                                                                                                                             |                                                                                                                                                                                                                                                                                                                                                          |                    |
| 028                      | $\frac{dV_{AL}}{dt} = F_{HLAL} - F_{ALVL}$                                                                                                                                                                                                                                                                                                                                                                                  | Change in blood volume in arteries of the systemic circulation is the difference between input ( $F_{HLAL}$ ) and output ( $F_{ALVL}$ ) blood flow.                                                                                                                                                                                                      | Proshin            |
| 029                      | $V_{AL}(0) = 0.13 \cdot V$                                                                                                                                                                                                                                                                                                                                                                                                  | 13% of the total blood volume $V$ is contained in the systemic arteries.                                                                                                                                                                                                                                                                                 | Hall               |
| 030                      | $G_{AL} = \text{mass}_{\text{elasticity}}(G_{AL0} + A_9 \cdot H, m)$                                                                                                                                                                                                                                                                                                                                                        | Systemic arterial elastance $G_{AL}$ is calculated according to the allometric law depending on the body weight $m$ .<br>$G_{AL0}$ – basic (independent of nervous and hormonal influences) systemic arterial elastance.<br>$A_9$ – degree of the $G_{AL0}$ dependence on nerve and hormonal influences.<br>$H$ – neurohumoral factor.                   | Proshin<br>MATLAB  |
| 031                      | $\omega_{AL} = \omega_{AL\_nom} - \text{mass}_{\text{volume}}(A_8, m) \cdot H$                                                                                                                                                                                                                                                                                                                                              | Unstressed volume of the systemic circulation arteries $\omega_{AL}$ is a volume of blood in the arteries at pressure equal to atmospheric pressure [S-D].<br>$\omega_{AL\_nom}$ – nominal unstressed volume of the arteries.<br>$A_8$ – sympathetic sensitivity of the systemic arteries normalized to the body weight $m$ . $H$ – neurohumoral factor. | Proshin<br>MATLAB  |
| 032                      | $\omega_{AL\_nom}(0) = k_{AL} \cdot V_{AL}$                                                                                                                                                                                                                                                                                                                                                                                 | $\omega_{AL\_nom}$ – unstressed volume of the systemic arteries without nervous and hormonal influences calculated as a fraction $k_{AL}$ of $V_{AL}$ .                                                                                                                                                                                                  | –                  |
| 033                      | $P_{AL} = G_{AL} \cdot (V_{AL} - \omega_{AL})$                                                                                                                                                                                                                                                                                                                                                                              | Arterial blood pressure $P_{AL}$ depends on the systemic arterial elastance $G_{AL}$ , blood volume $V_{AL}$ and unstressed volume $\omega_{AL}$ .                                                                                                                                                                                                       | Proshin<br>Ottesen |
| 034                      | $Vis = 1.23 \cdot \left(1 - \frac{Hct}{99}\right)^{-n}$ , $n = 1.7 + 9.86 \cdot \exp(-0.0607 \cdot Hct)$                                                                                                                                                                                                                                                                                                                    | Blood viscosity $Vis$ is calculated as the function of hematocrit ( $Hct$ ) with the plasma viscosity of 1.23 cP.                                                                                                                                                                                                                                        | Hund               |

|                              |                                                                                                        |                                                                                                                                                                                                                                                                                                                                                                                                                                                                                                                                                                                                                                                                                                                                                                                                                                                                                                                                                                                                                                                                                                                                                          |                   |
|------------------------------|--------------------------------------------------------------------------------------------------------|----------------------------------------------------------------------------------------------------------------------------------------------------------------------------------------------------------------------------------------------------------------------------------------------------------------------------------------------------------------------------------------------------------------------------------------------------------------------------------------------------------------------------------------------------------------------------------------------------------------------------------------------------------------------------------------------------------------------------------------------------------------------------------------------------------------------------------------------------------------------------------------------------------------------------------------------------------------------------------------------------------------------------------------------------------------------------------------------------------------------------------------------------------|-------------------|
| 035                          | $F_{ALVL} = \frac{Y_{ALVL} \cdot (P_{AL} - P_{VL})}{\frac{Vis}{Vis_{norm}} \cdot \Psi_{AT1\_ALVL}}$    | <p>Amount of blood flow from arterial to venous bed of the systemic circulation depends on the conductivity of the systemic microvessels (arterioles, capillaries and venules) <math>Y_{ALVL}</math>, as well as the difference between pressures in the systemic arteries <math>P_{AL}</math> and veins <math>P_{VL}</math> [Proshin]:</p> $F_{ALVL} = Y_{ALVL} \cdot (P_{AL} - P_{VL}).$ <p>We modified this formula based on the following facts.</p> <ol style="list-style-type: none"> <li>1. Value <math>F_{ALVL}</math> is inversely proportional to the normalized blood viscosity <math>Vis/Vis_{norm}</math> [Guyton].</li> <li>2. Conductivity <math>Y_{ALVL}</math> is the inverse of microvessel resistance influenced by calcium ions and angiotensin II binding to their AT1 receptors in the vascular smooth muscle [Hughes] (mainly in the arteries [Consigny]). To take into account the vasodilating effect of antihypertensive drugs affecting the renin-angiotensin-aldosterone system (and, as a consequence, the concentration of AT1-bound angiotensin II), we determined the function <math>\Psi_{AT1\_ALVL}</math>.</li> </ol> | Proshin<br>Guyton |
| 036                          | $\Psi_{AT1\_ALVL} = A_{AT1\_ALVL} + B_{AT1\_ALVL} \cdot AT1\_ANGII - \frac{C_{AT1\_ALVL}}{AT1\_ANGII}$ | <p>Effect of AT1-bound angiotensin II (<math>AT1\_ANGII</math>) on <math>Y_{ALVL}</math> is modeled by analogy with the influence functions of <math>AT1\_ANGII</math> on resistance of efferent/afferent arterioles, as well as interlobar, arcuate, and interlobular arteries in the model [Hallow, 2014]. We assume that a concentration of AT1-bound angiotensin II in the systemic arterioles has the same value as in the kidneys. <math>A_{AT1\_ALVL}</math>, <math>B_{AT1\_ALVL}</math> and <math>C_{AT1\_ALVL}</math> are constant.</p>                                                                                                                                                                                                                                                                                                                                                                                                                                                                                                                                                                                                         | —                 |
| <b>Systemic microvessels</b> |                                                                                                        |                                                                                                                                                                                                                                                                                                                                                                                                                                                                                                                                                                                                                                                                                                                                                                                                                                                                                                                                                                                                                                                                                                                                                          |                   |
| 037                          | $Y_{ALVL} = mass_{conductivity} (Y_{ALVL0} - A_3 \cdot H + A_4 \cdot DO_2, m)$                         | <p>Conductivity of the systemic microvessels (arterioles, capillaries and venules) <math>Y_{ALVL}</math>, the inverse of resistance to blood flow in the specified section of the bloodstream, is calculated according to the allometric law depending on the body weight <math>m</math>.</p> <p><math>Y_{ALVL0}</math> – basic conductivity.</p> <p><math>A_3</math> – sympathetic sensitivity of the systemic circulation microvessels characterizes a degree of the <math>Y_{ALVL}</math> dependence on nervous and hormonal influences. <math>H</math> – neurohumoral factor.</p> <p><math>A_4</math> – oxygen-deficient sensitivity of the systemic circulation microvessels characterizes a degree of the <math>Y_{ALVL}</math> dependence on the oxygen debt <math>DO_2</math> [S-D].</p>                                                                                                                                                                                                                                                                                                                                                         | Proshin<br>MATLAB |

| <b>Systemic veins</b>       |                                                                                                                                      |                                                                                                                                                                                                                                                                                                                              |                   |
|-----------------------------|--------------------------------------------------------------------------------------------------------------------------------------|------------------------------------------------------------------------------------------------------------------------------------------------------------------------------------------------------------------------------------------------------------------------------------------------------------------------------|-------------------|
| 038                         | $V_{VL} = V - V_{AL} - V_{AR} - V_{HL} - V_{HR} - V_{VR}$                                                                            | Volume of blood in the systemic veins $V_{VL}$ is calculated by reducing the total circulating blood volume $V$ by the volumes of all other compartments representing the cardiovascular system.                                                                                                                             | Proshin           |
| 039                         | $G_{VL} = mass_{elasticity}(G_{VL0} + A_{11} \cdot H, m)$                                                                            | Systemic vein elastance $G_{VL}$ is calculated by the allometric function taking the body weight $m$ .<br>$G_{VL0}$ – basic elasticity of the systemic vein walls independent of nervous and hormonal influences.<br>$A_{11}$ – venous tone, the $G_{VL}$ dependence on the indicated influences. $H$ – neurohumoral factor. | Proshin<br>MATLAB |
| 040                         | $\omega_{VL}(0) = k_{VL} \cdot V_{VL}$                                                                                               | Unstressed volume of the systemic circulation veins $\omega_{VL}$ is calculated as a fraction $k_{VL}$ of $V_{VL}$ .                                                                                                                                                                                                         | –                 |
| 041                         | $P_{VL} = P_0 + RA_{PULSE} + G_{VL} \cdot (V_{VL} - \omega_{VL})$                                                                    | Blood pressure in the systemic circulation veins $P_{VL}$ is the sum of the base pressure $P_0$ , pulse wave of the right atrium $RA_{PULSE}$ , as well as the product of the systemic vein elastance $G_{VL}$ and the difference between the blood volume $V_{VL}$ and unstressed volume $\omega_{VL}$ .                    | Proshin<br>MATLAB |
| <b>Right ventricle (RV)</b> |                                                                                                                                      |                                                                                                                                                                                                                                                                                                                              |                   |
| 042                         | $\frac{dV_{HR}}{dt} = F_{VLHR} - F_{HRAR}$                                                                                           | Change in blood volume in the RV due to the difference between the input blood flow $F_{VLHR}$ and the output blood flow $F_{HRAR}$ .                                                                                                                                                                                        | Proshin           |
| 043                         | $V_{HR}(0) = 0.03 \cdot V$                                                                                                           | Starting value of blood volume in the RV is 3% of the total blood volume $V$ , because the systemic circulation – 84% [Hall], the pulmonary circulation – 10% [Gazioglu], and values $V_{HL}(0)$ and $V_{HR}(0)$ are assumed to be equal.                                                                                    | Hall<br>Gazioglu  |
| 044                         | $K_R = K_{R0} + 0.25 \cdot nH \cdot \text{sigm}(20 \cdot (K_{R0} - 0.4)) - 0.25 \cdot nH \cdot \text{sigm}(20 \cdot (K_{R0} - 0.7))$ | Inotropic factor of the RV. Numerical characteristic of the myocardial inotropism (contractile ability). $K_{R0}$ – inotropic status of the RV.<br>$nH$ – myocardial sympathetic inotropic sensitivity.                                                                                                                      | Proshin           |
| 045                         | $\omega_{HR}(0) = k_{HR} \cdot V_{HR}$                                                                                               | Unstressed RV volume $\omega_{HR}$ is the RV volume at zero diastolic pressure [S-D], calculated as a fraction $k_{HR}$ of $V_{HR}$ .                                                                                                                                                                                        | –                 |



|     |                                                                                                                                                                                                                                                                                                                                                                                                                                                                                                                                                                                                                                                         |                                                                                                                                                                                                                                                                                                                                                                                                                                                                                                                                                                                                                                                                                                                                                                                                                                                                                                                                                                                                                                                                                                                                                                                                                                                                                                                                                                                                                                                                                                                                                                     |                   |
|-----|---------------------------------------------------------------------------------------------------------------------------------------------------------------------------------------------------------------------------------------------------------------------------------------------------------------------------------------------------------------------------------------------------------------------------------------------------------------------------------------------------------------------------------------------------------------------------------------------------------------------------------------------------------|---------------------------------------------------------------------------------------------------------------------------------------------------------------------------------------------------------------------------------------------------------------------------------------------------------------------------------------------------------------------------------------------------------------------------------------------------------------------------------------------------------------------------------------------------------------------------------------------------------------------------------------------------------------------------------------------------------------------------------------------------------------------------------------------------------------------------------------------------------------------------------------------------------------------------------------------------------------------------------------------------------------------------------------------------------------------------------------------------------------------------------------------------------------------------------------------------------------------------------------------------------------------------------------------------------------------------------------------------------------------------------------------------------------------------------------------------------------------------------------------------------------------------------------------------------------------|-------------------|
| 046 | <p>If:<br/> <math>Cycle_{Time} \geq Cycle_{Length}</math></p> <p>Then:</p> <ol style="list-style-type: none"> <li>1. <math>Cycle_{Time} = 0</math></li> <li>2. <math>V_{HR\_KD} = V_{HR}</math></li> <li>3. <math>V_{HR\_KS} = V_{HR} - K_R \cdot SV_{max} \cdot [sigm(0.03 \cdot (V_{HR} - FS_{threshold} - 80)) - sigm(0.03 \cdot (V_{HR} - FS_{threshold} - 260))]</math></li> <li>4. <math>Systole_{Length\_R\_Exp} = \frac{0.25}{H} + 0.2 \cdot (1 - K_R)</math></li> <li>5. <math>Systole_{Length\_R} = \frac{0.25}{H} + 0.2 \cdot (1 - K_R)</math></li> <li>6. <math>Systole_R = 1</math></li> <li>7. <math>P_{AR\_D} = P_{AR}</math></li> </ol> | <p>Transition "diastole – systole" is the instantaneous change of the RV parameters at the beginning of the cardiac cycle (a current cycle time <math>Cycle_{Time}</math> reaches a cycle duration <math>Cycle_{Length}</math>).</p> <ol style="list-style-type: none"> <li>1. Starting a new cycle corresponds to the zeroing <math>Cycle_{Time}</math>.</li> <li>2. End diastolic volume of the RV <math>V_{HR\_KD}</math> is equal to the RV blood volume at the end of diastole.</li> <li>3. End systolic volume of the RV <math>V_{HR\_KS}</math> is equal to the difference between <math>V_{HR} = V_{HR\_KD}</math> and the stroke volume of the RV, calculated as the product of <math>K_R</math>, theoretical maximum <math>SV_{max}</math> and the difference of two logistic functions, depending on <math>V_{HR}</math> and <math>FS_{threshold}</math> (threshold of the Frank-Starling law).</li> <li>4. <math>Systole_{Length\_R\_Exp}</math> – the nominal duration of the RV systole.</li> <li>5. <math>Systole_{Length\_R}</math> – the actual duration of the RV systole. It changes a value at the transition "RV systole – RV diastole", after which a mismatch may occur between <math>Systole_{Length\_R\_Exp}</math> and <math>Systole_{Length\_R}</math>.</li> <li>6. <math>Systole_R</math> – indicator of the actual RV systole. It equals 1 when <math>Systole_{Length\_R\_Exp}</math> and <math>Systole_{Length\_R}</math> are matched.</li> <li>7. <math>P_{AR\_D}</math> is diastolic pressure in the pulmonary arteries.</li> </ol> | Proshin<br>MATLAB |
| 047 | <p>If: <math>Systole = 1</math></p> <p>Then: <math>F_{HRAR\_p} = F_{HRAR}</math></p>                                                                                                                                                                                                                                                                                                                                                                                                                                                                                                                                                                    | <p>Systole start. A discrete event triggered after the transition "diastole – systole" (<math>Systole = 1</math>). At this time point, blood flow through the pulmonary valve <math>F_{HRAR}</math> achieves a peak value <math>F_{HRAR\_p}</math>.</p>                                                                                                                                                                                                                                                                                                                                                                                                                                                                                                                                                                                                                                                                                                                                                                                                                                                                                                                                                                                                                                                                                                                                                                                                                                                                                                             | –                 |
| 048 | <p>If:<br/> <math>V_{HR} &lt; V_{HR\_KS}</math> and <math>Systole_R = 1</math></p> <p>Then:</p> <ol style="list-style-type: none"> <li>1. <math>Systole_R = 0</math></li> <li>2. <math>Systole_{Length\_R} = Cycle_{Time}</math></li> <li>3. <math>P_{AR\_S} = P_{AR}</math></li> </ol>                                                                                                                                                                                                                                                                                                                                                                 | <p>Transition "RV systole – RV diastole". A discrete event characterized by the instantaneous change of the RV parameters at time of the diastole onset; it is triggered when the RV volume <math>V_{HR}</math> reaches the RV end-systolic volume <math>V_{HR\_KS}</math> provided that the RV is in the state of systole.</p> <ol style="list-style-type: none"> <li>1. <math>Systole_R = 0</math>, i.e. the RV is in the state of diastole.</li> <li>2. Actual duration of the RV systole <math>Systole_{Length\_R}</math> corresponds to the transition time from diastole to systole.</li> <li>3. <math>P_{AR\_S}</math> – systolic pressure in the pulmonary arteries.</li> </ol>                                                                                                                                                                                                                                                                                                                                                                                                                                                                                                                                                                                                                                                                                                                                                                                                                                                                             | Proshin<br>MATLAB |

|     |                                                                                                                 |                                                                                                                                                                                                                                                                                                                                                                                                                                                                                                         |                   |
|-----|-----------------------------------------------------------------------------------------------------------------|---------------------------------------------------------------------------------------------------------------------------------------------------------------------------------------------------------------------------------------------------------------------------------------------------------------------------------------------------------------------------------------------------------------------------------------------------------------------------------------------------------|-------------------|
| 049 | <p>If:<br/> <math>P_{VL} &gt; P_{HR}</math></p> <p>Then:<br/> <math>F_{VLHR\_ep} = F_{VLHR}</math></p>          | Opening of the tricuspid valve. A discrete event triggered as the RV enters the diastole state, when pressure in the systemic veins $P_{VL}$ becomes greater than pressure in the RV $P_{HR}$ . $F_{VLHR\_ep}$ is the early peak of the RV filling [van Straten].                                                                                                                                                                                                                                       | –                 |
| 050 | $P_{HR\_D} = mass_{elasticity} (G_{HR}, m) \cdot (V_{HR} - \omega_{HR})$                                        | Diastolic pressure in the RV $P_{HR\_D}$ depends on the blood volume $V_{HR}$ , unstressed volume $\omega_{HR}$ and the RV wall elasticity $G_{HR}$ (characterizing stiffness of the RV wall in the phase of its relaxation) taking into account the allometric scaling [Proshin, MATLAB].                                                                                                                                                                                                              | Ottesen           |
| 051 | $Systole_{R\_Exp} = \begin{cases} 0, & Cycle_{Time} \geq Systole_{Length\_R\_Exp} \\ 1, & else \end{cases}$     | Nominal RV systole indicator.                                                                                                                                                                                                                                                                                                                                                                                                                                                                           | Proshin<br>MATLAB |
| 052 | $DTS_R = Systole_R - Systole_{R\_Exp}$                                                                          | RV systolic mismatch.                                                                                                                                                                                                                                                                                                                                                                                                                                                                                   | Proshin<br>MATLAB |
| 053 | $\frac{dCycle_{Time}}{dt} = 1$                                                                                  | Mapping time of the current cardiac cycle $Cycle_{Time}$ to the model time of the RV module.                                                                                                                                                                                                                                                                                                                                                                                                            | –                 |
| 054 | $\frac{dP_{HR\_S}}{dt} = A_{15} \cdot DTS_R$                                                                    | Systolic pressure in the RV $P_{HR\_S}$ depending on a magnitude of mismatch $DTS_R$ and coefficient of sensitivity $A_{15}$ .                                                                                                                                                                                                                                                                                                                                                                          | Proshin<br>MATLAB |
| 055 | $P_{HR} = Systole_R \cdot P_{HR\_S} + P_{AR} \cdot (Systole - Systole_R) + (1 - Systole) \cdot P_{HR\_D}$       | RV pressure $P_{HR}$ is calculated by the following way:<br>$P_{HR} = P_{HR\_S}$ , if the RV is in the state of systole;<br>$P_{HR} = P_{AR}$ , if the RV is in the state of diastole, and the LV is in the state of systole;<br>$P_{HR} = P_{HR\_D}$ , if both the RV and the LV are in the state of diastole.                                                                                                                                                                                         | Proshin<br>MATLAB |
| 056 | $Y_{VLHR} = mass_{conductivity} (Y_{VLHR0} + P_{VL} \cdot A_6 + RO_{20} \cdot A_7 - P_{HR\_S} \cdot A_{10}, m)$ | Conductivity of the tricuspid valve and systemic veins $Y_{VLHR}$ is the inverse of resistance to blood flow in the specified area of the bloodstream. It is calculated taking into account the allometric scaling relative to the body weight $m$ . $Y_{VLHR0}$ – basic conductivity,<br>$P_{VL}$ – pressure in the inferior vena cava and the right atrium,<br>$RO_{20}$ – average normal value of oxygen demand,<br>$P_{HR\_S}$ – systolic pressure in the RV, $A_6$ , $A_7$ , $A_{10}$ – constants. | Proshin<br>MATLAB |

|     |                                                                                                                                                                                                                                                                                                                                       |                                                                                                                                                                                                                                                                                                                                                                                                                                                                                                                                                                                                                                                                     |                   |
|-----|---------------------------------------------------------------------------------------------------------------------------------------------------------------------------------------------------------------------------------------------------------------------------------------------------------------------------------------|---------------------------------------------------------------------------------------------------------------------------------------------------------------------------------------------------------------------------------------------------------------------------------------------------------------------------------------------------------------------------------------------------------------------------------------------------------------------------------------------------------------------------------------------------------------------------------------------------------------------------------------------------------------------|-------------------|
| 057 | $F_{VLHR} = valve(P_{VL}, P_{HR}, K_{VLHR}, Y_{VLHR})$                                                                                                                                                                                                                                                                                | Amount of blood flow through the tricuspid valve $F_{VLHR}$ is characterized by the difference between pressure in the inferior vena cava and the right atrium $P_{VL}$ and pressure in the RV $P_{HR}$ .<br>$Y_{VLHR}$ – conductivity of the tricuspid valve and systemic veins.<br>$K_{VLHR}$ – regurgitation coefficient describes the tricuspid valve closing function failure that leads to the reverse blood flow from the RV to the right atrium and vena cava in the systole phase in conditions of the valve defect.                                                                                                                                       | S-D               |
| 058 | $F_{HRAR} = valve(P_{HR}, P_{AR}, K_{HRAR}, mass_{conductivity}(Y_{HRAR}, m))$                                                                                                                                                                                                                                                        | Amount of blood flow through the pulmonary valve and pulmonary arteries $F_{HRAR}$ is characterized by the difference between pressure in the RV $P_{HR}$ and pressure $P_{AR}$ in the upper part of the pulmonary artery and large arterial vessels extending from it.<br>$Y_{HRAR}$ – conductivity of the pulmonary valve and pulmonary arteries taking into account the allometric scaling relative to the body weight $m$ .<br>$K_{HRAR}$ – regurgitation coefficient describing the pulmonary valve closing function failure that leads to the reverse blood flow from the pulmonary artery to the RV in the diastole phase in conditions of the valve defect. | S-D               |
| 059 | $RA_{PULSE} = atrium_{pulse}(Cycle_{Length}, Systole_{Length\_R}, P_{AL}, Cycle_{Time})$                                                                                                                                                                                                                                              | Right atrium pulse wave depends on the cycle duration $Cycle_{Length}$ , actual duration of the RV systole $Systole_{Length\_R}$ , pressure in arteries of the systemic circulation $P_{AL}$ and the current time of the cardiac cycle $Cycle_{Time}$ .                                                                                                                                                                                                                                                                                                                                                                                                             | Proshin<br>MATLAB |
| 060 | If:<br>$Cycle_{Time} > Cycle_{Length} - 0.2 \cdot (Cycle_{Length} - Systole_{Length\_R})$<br>Then:<br>$F_{VLHR\_ap} = F_{VLHR}$                                                                                                                                                                                                       | A discrete event that defines the active peak $F_{VLHR\_ap}$ in blood flow through the tricuspid valve $F_{VLHR}$ . This peak is achieved with the right atrial contraction [van Straten] at the time when the value $RA_{PULSE}$ becomes positive.                                                                                                                                                                                                                                                                                                                                                                                                                 | –                 |
| 061 | $V_{HR\_KS}(0) = V_{HR\_KD} - K_R \cdot SV_{max} \cdot [sigm(0.03 \cdot (V_{HR\_KD} - FS_{threshold} - 80)) - sigm(0.03 \cdot (V_{HR\_KD} - FS_{threshold} - 260))]$<br>$Systole_{Length\_R\_Exp}(0) = 0.25 \cdot Cycle_{Length} + 0.2 \cdot (1 - K_R)$<br>$Systole_{Length\_R}(0) = 0.25 \cdot Cycle_{Length} + 0.2 \cdot (1 - K_R)$ | Initialization of parameters, according to the implementation of the model by Proshin and Solodyannikov in MATLAB, received from the authors. See equation group 045 for explanation.                                                                                                                                                                                                                                                                                                                                                                                                                                                                               | Proshin<br>MATLAB |

| Pulmonary arteries |                                                                      |                                                                                                                                                                                                                                                                                                                                                                                                                     |                    |
|--------------------|----------------------------------------------------------------------|---------------------------------------------------------------------------------------------------------------------------------------------------------------------------------------------------------------------------------------------------------------------------------------------------------------------------------------------------------------------------------------------------------------------|--------------------|
| 062                | $\frac{dV_{AR}}{dt} = F_{HRAR} - F_{ARVR}$                           | Blood volume change in the pulmonary circulation arteries due to the difference between the input blood flow $F_{HRAR}$ and the output blood flow $F_{ARVR}$ .                                                                                                                                                                                                                                                      | Proshin            |
| 063                | $V_{AR}(0) = 0.035 \cdot V$                                          | Starting value of blood volume in the pulmonary arteries is 3.5% of the total blood volume $V$ , because the pulmonary circulation is 10% of $V$ , and the pulmonary arterial volume is 35% of the pulmonary vessels.                                                                                                                                                                                               | Gazioglu           |
| 064                | $G_{AR} = mass_{elasticity} (G_{AR0} + A_{19} \cdot H, m)$           | Pulmonary arterial elastance $G_{AR}$ is calculated by the allometric function taking the body weight $m$ .<br>$G_{AR0}$ – basic pulmonary arterial elastance.<br>$A_{19}$ – pulmonary arterial tone, the degree of the $G_{AR}$ dependence on nervous and hormonal influences.<br>$H$ – neurohumoral factor.                                                                                                       | Proshin<br>MATLAB  |
| 065                | $\omega_{AR} = \omega_{AR\_nom} - mass_{volume} (A_{18}, m) \cdot H$ | Unstressed volume of the pulmonary circulation arteries $\omega_{AR}$ is the volume of blood in these arteries at pressure equal to the atmospheric pressure [S-D].<br>$\omega_{AR\_nom}$ – nominal unstressed volume.<br>$A_{18}$ – sympathetic sensitivity of the pulmonary circulation arteries.<br>$H$ – neurohumoral factor.                                                                                   | Proshin<br>MATLAB  |
| 066                | $\omega_{AR\_nom}(0) = k_{AR} \cdot V_{AR}$                          | Unstressed volume of the pulmonary arteries without hormonal and nervous influences $\omega_{AR\_nom}$ is calculated as a fraction $k_{AR}$ of $V_{AR}$ .                                                                                                                                                                                                                                                           | –                  |
| 067                | $P_{AR} = G_{AR} \cdot (V_{AR} - \omega_{AR})$                       | Pressure in the pulmonary arteries $P_{AR}$ depends on the pulmonary arterial elastance $G_{AR}$ , blood volume $V_{AR}$ , and unstressed volume $\omega_{AR}$ .                                                                                                                                                                                                                                                    | Proshin<br>Ottesen |
| 068                | $F_{ARVR} = \frac{Y_{ARVR}}{Vis/Vis_{norm}} \cdot (P_{AR} - P_{VR})$ | Blood flow through the pulmonary microvessels $F_{ARVR}$ depends on their conductivity $Y_{ARVR}$ and the difference between pressures in the pulmonary arteries $P_{AR}$ and veins $P_{VR}$ [Proshin]:<br>$F_{ARVR} = Y_{ARVR} \cdot (P_{AR} - P_{VR}).$<br>We modified this formula so that the value of $F_{ARVR}$ should be inversely proportional to the normalized blood viscosity $Vis/Vis_{norm}$ [Guyton]. | Proshin<br>Guyton  |

| <b>Pulmonary microvessels</b> |                                                                                      |                                                                                                                                                                                                                                                                                                                                                                                                                                                                                                                                                                                                                                                                                      |                     |
|-------------------------------|--------------------------------------------------------------------------------------|--------------------------------------------------------------------------------------------------------------------------------------------------------------------------------------------------------------------------------------------------------------------------------------------------------------------------------------------------------------------------------------------------------------------------------------------------------------------------------------------------------------------------------------------------------------------------------------------------------------------------------------------------------------------------------------|---------------------|
| 069                           | $Y_{ARVR} = mass_{conductivity} (Y_{ARVR0} - A_{13} \cdot H + A_{14} \cdot DO_2, m)$ | <p>Conductivity of the pulmonary microvessels (venules, capillaries and arterioles) <math>Y_{ARVR}</math>, the inverse of resistance to blood flow in the indicated section of the bloodstream, is calculated according to the allometric law depending on the body weight <math>m</math>.</p> <p><math>Y_{ARVR0}</math> – basic conductivity.</p> <p><math>A_{13}</math> – sympathetic sensitivity of the pulmonary microvessels characterizes dependence of <math>Y_{ARVR}</math> on nervous and hormonal influences.</p> <p><math>H</math> – neurohumoral factor.</p> <p><math>A_{14}</math> – pulmonary microvessels sensitivity to the oxygen debt <math>DO_2</math> [S-D].</p> | Proshin<br>MATLAB   |
| <b>Pulmonary veins</b>        |                                                                                      |                                                                                                                                                                                                                                                                                                                                                                                                                                                                                                                                                                                                                                                                                      |                     |
| 070                           | $\frac{dV_{VR}}{dt} = F_{ARVR} - F_{VRHL}$                                           | <p>Blood volume change in the pulmonary circulation veins due to the difference between the input blood flow <math>F_{ARVR}</math> and the output blood flow <math>F_{VRHL}</math>.</p>                                                                                                                                                                                                                                                                                                                                                                                                                                                                                              | Proshin             |
| 071                           | $V_{VR}(0) = 0.065 \cdot V$                                                          | <p>Starting value of blood volume in the pulmonary veins is 6.5% of the total blood volume <math>V</math>, because the pulmonary circulation is 10% of <math>V</math>, pulmonary veins – 45%, and capillaries – 20% of pulmonary vessels [Gazioglu]. In the model by Proshin and Solodyannikov, the pulmonary veins and capillaries are included in one compartment of the circulatory system.</p>                                                                                                                                                                                                                                                                                   | Gazioglu<br>Proshin |
| 072                           | $G_{VR} = mass_{elasticity} (G_{VR0} + A_{11} \cdot H, m)$                           | <p>Pulmonary vein elastance <math>G_{VR}</math> is calculated by the allometric function taking the body mass <math>m</math>.</p> <p><math>G_{VR0}</math> – basic elasticity of the pulmonary vein walls independent of nervous and hormonal influences.</p> <p><math>A_{11}</math> – venous tone, the <math>G_{VR}</math> dependence on the indicated influences.</p> <p><math>H</math> – neurohumoral factor.</p>                                                                                                                                                                                                                                                                  | Proshin<br>MATLAB   |
| 073                           | $\omega_{VR}(0) = k_{VR} \cdot V_{VR}$                                               | <p>Unstressed volume of the pulmonary circulation veins <math>\omega_{VR}</math> is calculated as a fraction <math>k_{VR}</math> of <math>V_{VR}</math>.</p>                                                                                                                                                                                                                                                                                                                                                                                                                                                                                                                         | –                   |
| 074                           | $P_{VR} = P_0 + LA_{PULSE} + G_{VR} \cdot (V_{VR} - \omega_{VR})$                    | <p>Blood pressure in the pulmonary circulation veins <math>P_{VR}</math> is the sum of the base pressure <math>P_0</math>, left atrium pulse wave <math>LA_{PULSE}</math>, and the product of the pulmonary vein elastance <math>G_{VR}</math> and the difference between the blood volume <math>V_{VR}</math> and unstressed volume <math>\omega_{VR}</math>.</p>                                                                                                                                                                                                                                                                                                                   | Proshin<br>MATLAB   |

| <b>Tissue metabolism</b>    |                                                                        |                                                                                                                                                                                                                                                                                                                                                                                                                                                                                                                                                                                                   |                   |
|-----------------------------|------------------------------------------------------------------------|---------------------------------------------------------------------------------------------------------------------------------------------------------------------------------------------------------------------------------------------------------------------------------------------------------------------------------------------------------------------------------------------------------------------------------------------------------------------------------------------------------------------------------------------------------------------------------------------------|-------------------|
| 075                         | $gO_2 = F_{ALVL} \cdot \min(AO_2 - VO_2, 1)$                           | Amount of oxygen consumption $gO_2$ in tissues is proportional to blood flow through the tissues $F_{ALVL}$ and the arteriovenous oxygen difference $AO_2 - VO_2$ .                                                                                                                                                                                                                                                                                                                                                                                                                               | Proshin<br>MATLAB |
| 076                         | $AO_2 = \frac{He \cdot C_H \cdot SpO_2}{1000}$                         | Arterial oxygen content $AO_2$ is calculated as the product of the total amount of hemoglobin $He$ (g/l), oxygen capacity of hemoglobin $C_H$ (mg/ml) and arterial oxygen saturation $SpO_2$ , which characterizes a percentage of hemoglobin saturated with oxygen.                                                                                                                                                                                                                                                                                                                              | S-D               |
| 077                         | $\frac{dDO_2}{dt} = \text{sgn}(DO_2, A_2 \cdot (RO_2 - gO_2))$         | Rate of change of the accumulated amount of unmet oxygen requirement (oxygen debt) $DO_2$ is proportional to the difference between the oxygen demand $RO_2$ and oxygen consumption $gO_2$ . Oxygen debt decreases with $RO_2 < gO_2$ , and increases with $RO_2 > gO_2$ . Parameter $A_2$ is the organism functional status. It describes the rate of change of the weariness factor under the change of physical activity, with advent of the non-zero difference between $RO_2$ and $gO_2$ . The parameter does not effect on periodical modes in the absence of changes in physical activity. | Proshin<br>MATLAB |
| 078                         | $\frac{dVO_2}{dt} = A_1 \cdot (gO_2 - RO_2)$                           | Rate of change of the venous oxygen content $VO_2$ is proportional to the difference between the oxygen consumption $gO_2$ and oxygen demand $RO_2$ . $A_1$ is the total metabolic intensity describing the rate of transient processes under the change of physical activity, i.e. with advent of the non-zero difference between $RO_2$ and $gO_2$ .                                                                                                                                                                                                                                            | Proshin           |
| 079                         | $RO_2(0) = \text{mass}_{volume}(RO_{20}, m)$                           | Oxygen demand is calculated according to the allometric law at the initial moment of time and depends on the average normal value $RO_{20}$ and the body weight $m$ .                                                                                                                                                                                                                                                                                                                                                                                                                             | Proshin<br>MATLAB |
| <b>Neurohumoral control</b> |                                                                        |                                                                                                                                                                                                                                                                                                                                                                                                                                                                                                                                                                                                   |                   |
| 080                         | $nB = \min(r_{minus}(0.07, 30, P_{AL}, 50 \cdot \psi_{AT1\_Baro}), 1)$ | In the model by Proshin and Solodyannikov, the baroreceptor activity is determined by the function $nB = \min(r_{minus}(0.07, 30, P_{AL}, 50), 1)$ , where $P_{AL}$ is arterial pressure in the systemic circulation, and $P_0 = 50$ mmHg is the baroreceptor sensitivity threshold, i.e. the lower bound for $P_{AL}$ , at which $nB = 0$ . When modeling the pharmacological action of drugs affecting the concentration of AT1-bound angiotensin II ( $ATI\_ANGII$ ), we took into account the fact that this hormone, interacting with AT1                                                    | Proshin<br>MATLAB |

|     |                                                                                                                                |                                                                                                                                                                                                                                                                                                                                                                                                                                                                                                                                                                                                                |                   |
|-----|--------------------------------------------------------------------------------------------------------------------------------|----------------------------------------------------------------------------------------------------------------------------------------------------------------------------------------------------------------------------------------------------------------------------------------------------------------------------------------------------------------------------------------------------------------------------------------------------------------------------------------------------------------------------------------------------------------------------------------------------------------|-------------------|
|     |                                                                                                                                | receptors, promotes an increase in blood pressure without a decrease in heart rate through raising the $P_0$ threshold [Reid]. We achieved such dynamics using a coefficient $\psi_{AT1\_Baro}$ proportional to $ATI\_ANGII$ . Together with affect on the stress receptor activity function, this decision allowed to simulate the therapeutic decrease in the $P_{AL}$ value without changing the heart rate, which, for example, characterizes losartan [Porthan], [Nedogoda].                                                                                                                              |                   |
| 081 | $\psi_{AT1\_Baro} = sl_{baro} \cdot \frac{ATI\_ANGII}{ATI\_ANGII_{norm}} + 1 - sl_{baro}$                                      | We assumed the linear function with the slope $0 < sl_{baro} < 1$ as the influence of the normalized AT1-bound angiotensin II level ( $ATI\_ANGII/ATI\_ANGII_{norm}$ ) on the threshold of baroreceptor sensitivity.                                                                                                                                                                                                                                                                                                                                                                                           | –                 |
| 082 | $nS = \min(r_{plus}(10, 50, st \cdot \psi_{AT1\_Stress}, 0), 1)$                                                               | In the Proshin and Solodyannikov model, activity of the stress receptors is determined by the function $nS = \min(r_{plus}(10, 50, st, 0), 1)$ , where $st$ is a stress factor describing the level of steroid hormones in the blood (adrenaline, norepinephrine) and taking nominal values from 0 (absolute rest) to 1 (absolute stress). We multiplied $st$ by a coefficient $\psi_{AT1\_Stress}$ proportional to the concentration of AT1-bound angiotensin II ( $ATI\_ANGII$ ) based on the fact that this hormone, acting on AT1 receptors, increases the norepinephrine release from the atria [Brasch]. | Proshin<br>MATLAB |
| 083 | $\psi_{AT1\_Stress} = sl_{stress} \cdot \frac{ATI\_ANGII}{ATI\_ANGII_{norm}} + 1 - sl_{stress}$                                | We assumed the linear function with the slope $0 < sl_{stress} < 1$ as the effect of the normalized concentration of AT1-bound angiotensin II ( $ATI\_ANGII/ATI\_ANGII_{norm}$ ) on the stress factor.                                                                                                                                                                                                                                                                                                                                                                                                         | –                 |
| 084 | $nV = \min(r_{minus}(30, 30, VO_2, 0), 1)$                                                                                     | Respiratory receptor activity function depending on the venous oxygen content $VO_2$ .                                                                                                                                                                                                                                                                                                                                                                                                                                                                                                                         | Proshin<br>MATLAB |
| 085 | $nD = \min(r_{plus}(0.1, 10, DO_2, 0), 1)$                                                                                     | Weariness receptor activity function depending on the oxygen debt $DO_2$ .                                                                                                                                                                                                                                                                                                                                                                                                                                                                                                                                     | Proshin<br>MATLAB |
| 086 | $nSum = Heart_{Baro} \cdot nB + Heart_{Stress} \cdot nS + \\ + Heart_{Oxygen} \cdot nD + Heart_{VO_2} \cdot nV + Heart_{Base}$ | Cardiac center activity function $nSum$ is the sum signal of activities of the stress ( $nS$ ), weariness ( $nD$ ), and respiratory ( $nV$ ) receptors, as well as the baroreceptors ( $nB$ ).<br>$Heart_{Baro}$ is baroreceptor sensitivity of the cardiac center characterizing the dependence of nervous control actions on a value of arterial pressure.<br>$Heart_{Stress}$ is stress sensitivity of the cardiac center characterizing the dependence of nervous control actions on a value of the receptor stress signal.                                                                                | Proshin           |

|                                                          |                                                                                                             |                                                                                                                                                                                                                                                                                                                                                                                                                                                                                                                                                                                                                                 |                   |
|----------------------------------------------------------|-------------------------------------------------------------------------------------------------------------|---------------------------------------------------------------------------------------------------------------------------------------------------------------------------------------------------------------------------------------------------------------------------------------------------------------------------------------------------------------------------------------------------------------------------------------------------------------------------------------------------------------------------------------------------------------------------------------------------------------------------------|-------------------|
|                                                          |                                                                                                             | <p><math>Heart_{Oxygen}</math> is weariness sensitivity of the cardiac center characterizing the dependence of nervous control actions on the value of oxygen debt. A smaller value of the parameter corresponds to the lower dependence of heart rate on the level of oxygen starvation, i.e. the greater tolerance to the physical activity.</p> <p><math>Heart_{VO_2}</math> is respiratory sensitivity of the cardiac center characterizing the dependence of nervous control actions on the concentration of oxygen in the venous blood.</p> <p><math>Heart_{Base}</math> is the basic activity of the cardiac center.</p> |                   |
| 087                                                      | $nH = \begin{cases} 0, & H < 0 \\ \frac{1 - \exp(-3H)}{1 + 100 \cdot \exp(-3H)}, & \text{else} \end{cases}$ | Sigmoid function of the myocardial sympathetic inotropic sensitivity depending on the neurohumoral factor $H$ .                                                                                                                                                                                                                                                                                                                                                                                                                                                                                                                 | Proshin<br>MATLAB |
| 088                                                      | $\frac{dH}{dt} = A_{12} \cdot (3.2 \cdot \min(r_{plus}(2,18,nSum,0),1) - H)$                                | Equation for calculating the neurohumoral factor $H$ taking into account reactivity of the cardiac center $A_{12}$ , which characterizes its adaptive ability and determines the signal rate through the axon of formal neuron.                                                                                                                                                                                                                                                                                                                                                                                                 | Proshin<br>MATLAB |
| <b>Coordination of LV and RV systolic time intervals</b> |                                                                                                             |                                                                                                                                                                                                                                                                                                                                                                                                                                                                                                                                                                                                                                 |                   |
| 089                                                      | $Systole = \begin{cases} 0, & Systole_L = 0 \text{ and } Systole_R = 0 \\ 1, & \text{else} \end{cases}$     | $Systole$ is an indicator of the total actual systole. It equals 0, if the actual LV and RV systole indicators are simultaneously equal to 0, and 1, otherwise.                                                                                                                                                                                                                                                                                                                                                                                                                                                                 | Proshin<br>MATLAB |
| <b>Nervous system</b>                                    |                                                                                                             |                                                                                                                                                                                                                                                                                                                                                                                                                                                                                                                                                                                                                                 |                   |
| 090                                                      | $RSNA = N_{rsna} \cdot \alpha_{map} \cdot \alpha_{rap}$                                                     | Renal sympathetic nerve activity $RSNA$ depends on the normalized value of $N_{rsna}$ .                                                                                                                                                                                                                                                                                                                                                                                                                                                                                                                                         | Karaaslan<br>2005 |
| 091                                                      | $\alpha_{map} = 0.5 + 1.1 \cdot \left( 1 + \exp\left(\frac{MAP - 100}{15}\right) \right)^{-1}$              | Effect of mean arterial pressure $MAP$ on $RSNA$ .                                                                                                                                                                                                                                                                                                                                                                                                                                                                                                                                                                              | Karaaslan<br>2005 |
| 092                                                      | $\alpha_{rap} = 1 - 0.008 \cdot P_{ra}$                                                                     | Effect of right atrial pressure $P_{ra}$ on $RSNA$ .                                                                                                                                                                                                                                                                                                                                                                                                                                                                                                                                                                            | Karaaslan<br>2005 |
| 093                                                      | $P_{ra} = 0.2787 \cdot \exp(0.2281 \cdot CO)$                                                               | Normalized right atrial pressure $P_{ra}$ is calculated according to the Frank-Starling law as the function of cardiac output $CO$ .                                                                                                                                                                                                                                                                                                                                                                                                                                                                                            | Karaaslan<br>2005 |



| Sodium <sup>5</sup> |                                                                                                                  |                                                                                                                                                                                                                                 |                             |
|---------------------|------------------------------------------------------------------------------------------------------------------|---------------------------------------------------------------------------------------------------------------------------------------------------------------------------------------------------------------------------------|-----------------------------|
| 094                 | $\Phi_{filsod} = GFR \cdot C_{sod}$                                                                              | Amount of the sodium filtered from the glomerulus to the proximal tubule per unit time $\Phi_{filsod}$ is expressed as the product of the glomerular filtration rate ( <i>GFR</i> ) and sodium plasma concentration $C_{sod}$ . | Karaaslan 2005              |
| 095                 | $\eta_{pt\_sodreab} = \min(1, n_{\eta\_pt} \cdot \gamma_{filsod} \cdot \gamma_{at} \cdot \gamma_{rsna})$         | Fractional proximal sodium reabsorption is defined as the normal value $n_{\eta\_pt}$ multiplied by functions of the various factors described below. Cannot exceed 100% of the filtered sodium.                                | Karaaslan 2005              |
| 096                 | $\gamma_{at} = 0.95 + \frac{0.12}{1 + \exp(2.6 - 1.8 \cdot \log AT1\_ANGII)}$                                    | An increase in the level of AT1-bound angiotensin II ( <i>AT1\_ANGII</i> ) results in the rise of fractional proximal sodium reabsorption.                                                                                      | Karaaslan 2005              |
| 097                 | $\gamma_{filsod} = 0.8 + \frac{0.3}{1 + 138^{-1} \cdot \exp(\Phi_{filsod} - 14)}$                                | An increase in the amount of the filtered sodium load $\Phi_{filsod}$ leads to the decrease in the fractional proximal sodium reabsorption.                                                                                     | Karaaslan 2005 <sup>6</sup> |
| 098                 | $\gamma_{rsna} = 0.5 + \frac{0.7}{1 + 2.18^{-1} \cdot \exp(1 - RSNA)}$                                           | An increase in the renal sympathetic nerve activity <i>RSNA</i> results in the rising of the fractional proximal sodium reabsorption.                                                                                           | Karaaslan 2005 <sup>6</sup> |
| 099                 | $\Phi_{pt\_sodreab} = \Phi_{filsod} \cdot \eta_{pt\_sodreab}$                                                    | Absolute proximal tubular sodium reabsorption rate.                                                                                                                                                                             | Karaaslan 2005              |
| 100                 | $\Phi_{md\_sod} = \Phi_{filsod} - \Phi_{pt\_sodreab}$                                                            | Macula densa sodium flow rate.                                                                                                                                                                                                  | Karaaslan 2005              |
| 101                 | $\eta_{dt\_sodreab} = \min(1, n_{\epsilon\_dt} \cdot \psi_{al})$                                                 | Fractional distal tubule sodium reabsorption is defined as the normal value $n_{\epsilon\_dt}$ multiplied by the function of aldosterone concentration influence $\psi_{al}$ . Cannot exceed 100%.                              | Hallow 2014                 |
| 102                 | $\psi_{al} = 0.17 + 0.94 \cdot \left(1 + \exp\left(\frac{0.48 - 1.2 \cdot \log C_{al}}{0.88}\right)\right)^{-1}$ | Effect of the aldosterone concentration $C_{al}$ on the fractional distal tubule sodium reabsorption.                                                                                                                           | Karaaslan 2005              |
| 103                 | $\Phi_{dt\_sodreab} = \Phi_{md\_sod} \cdot \eta_{dt\_sodreab}$                                                   | Absolute distal tubule sodium reabsorption rate.                                                                                                                                                                                | Karaaslan 2005              |
| 104                 | $\Phi_{dt\_sod} = \Phi_{md\_sod} - \Phi_{dt\_sodreab}$                                                           | Rate of the distal tubule sodium outflow.                                                                                                                                                                                       | Karaaslan 2005              |
| 105                 | $\eta_{cd\_sodreab} = \min(1, n_{\eta\_cd} \cdot \lambda_{dt} \cdot \lambda_{anp})$                              | Fractional collecting duct sodium reabsorption is defined as the normal value $n_{\eta\_cd}$ multiplied by functions of the various factors described below. Cannot exceed 100%.                                                | Karaaslan 2005              |

<sup>5</sup> The process of sodium transport and reabsorption along the nephron is given by [Palmer].

<sup>6</sup> The formula is presented taking into account correction of typos revealed during correspondence with authors of the model during its validation in BioUML.

|              |                                                                                                           |                                                                                                                                                                                                                                                                                                                                                                                                                                                                                                       |                                       |
|--------------|-----------------------------------------------------------------------------------------------------------|-------------------------------------------------------------------------------------------------------------------------------------------------------------------------------------------------------------------------------------------------------------------------------------------------------------------------------------------------------------------------------------------------------------------------------------------------------------------------------------------------------|---------------------------------------|
| 106          | $\lambda_{dt} = 0.82 + \frac{0.39}{1 + \exp(0.5 \cdot (\Phi_{dt\_sod} - 1.6))}$                           | Effect of the distal tubule sodium outflow rate $\Phi_{dt\_sod}$ on the fractional collecting duct sodium reabsorption.                                                                                                                                                                                                                                                                                                                                                                               | Karaaslan<br>2005                     |
| 107          | $\lambda_{anp} = -0.1 \cdot \frac{C_{anp}}{C_{anp\_norm}} + 1.1199$                                       | Effect of the atriopeptin concentration $C_{anp}$ on the fractional collecting duct sodium reabsorption.                                                                                                                                                                                                                                                                                                                                                                                              | Karaaslan<br>2005                     |
| 108          | $\Phi_{cd\_sodreab} = \Phi_{dt\_sod} \cdot \eta_{cd\_sodreab}$                                            | Absolute collecting duct sodium reabsorption rate.                                                                                                                                                                                                                                                                                                                                                                                                                                                    | Karaaslan<br>2005                     |
| 109          | $\Phi_{u\_sod} = \Phi_{dt\_sod} - \Phi_{cd\_sodreab}$                                                     | Urine sodium excretion rate.                                                                                                                                                                                                                                                                                                                                                                                                                                                                          | Karaaslan<br>2005                     |
| 110          | $\frac{dM_{sod}}{dt} = \Phi_{sodin} - \Phi_{u\_sod}$                                                      | Rate of the total exchangeable sodium ( $M_{sod}$ ) formation is determined by the difference between the rate of sodium intake $\Phi_{sodin}$ and the rate of sodium excretion $\Phi_{u\_sod}$ .                                                                                                                                                                                                                                                                                                     | Hallow<br>2014                        |
| 111          | $C_{sod} = 1.03 \cdot \frac{(M_{sod} - 410)}{TBW} - 0.29 \cdot glucose + 78.44$                           | Plasma sodium concentration $C_{sod}$ is defined depending on the total body water $TBW$ and the plasma glucose concentration (taking into account the conversion factor from mmol/l to mg/dl [Bhagat]) by the formula [Nguyen] obtained on the basis of the Edelman equation [Edelman]:<br>$C_{sod} = 1.03 \cdot \frac{M_{sod} + M_K}{TBW} - 23.8 - \frac{1.6}{100} \cdot (18 \cdot glucose - 120),$ where $M_K$ is the total exchangeable potassium [Moore, 1967]:<br>$M_K = 97.4 \cdot TBW - 410.$ | Nguyen<br><br>Moore<br>1967           |
| <b>Renin</b> |                                                                                                           |                                                                                                                                                                                                                                                                                                                                                                                                                                                                                                       |                                       |
| 112          | $R_{sec} = \frac{\ln 2}{h_{renin}} \cdot PRC_{nom} \cdot v_{MD\_sod} \cdot v_{RSNA} \cdot v_{AT1\_ANGII}$ | In the model [Hallow, 2014], the renin secretion rate is determined by the equation $R_{sec} = N_{rs} \cdot v_{MD\_sod} \cdot v_{RSNA} \cdot v_{AT1\_ANGII}$ , where $N_{rs}$ is the renin secretion equilibrium rate, and $v_{MD\_sod}$ , $v_{RSNA}$ , $v_{AT1\_ANGII}$ represent influences of various factors on $R_{sec}$ (see below). We took into account that $N_{rs} = \ln 2 / h_{renin} \cdot PRC_{nom}$ according to [Hallow, 2017a].                                                       | Hallow<br>2014<br><br>Hallow<br>2017a |
| 113          | $v_{MD\_sod} = \exp(-\tau_{MD\_renin} \cdot (\Phi_{md\_sod} - \Phi_{md\_sod\_0}))$                        | Influence of the macula densa sodium flow rate $\Phi_{md\_sod}$ on the rate of renin secretion $R_{sec}$ using the nominal value $\Phi_{md\_sod\_0}$ . $\tau_{MD\_renin}$ is a constant.                                                                                                                                                                                                                                                                                                              | Hallow<br>2017a                       |

|                    |                                                                                                                                                             |                                                                                                                                                                                                                                                                                                                                                                                                    |                   |
|--------------------|-------------------------------------------------------------------------------------------------------------------------------------------------------------|----------------------------------------------------------------------------------------------------------------------------------------------------------------------------------------------------------------------------------------------------------------------------------------------------------------------------------------------------------------------------------------------------|-------------------|
| 114                | $v_{RSNA} = 1.89 - \frac{2.056}{1.358 + \exp(RSNA - 0.8667)}$                                                                                               | Effect of the renal sympathetic nerve activity $RSNA$ on the rate of renin secretion $R_{sec}$ .                                                                                                                                                                                                                                                                                                   | Karaaslan<br>2005 |
| 115                | $v_{AT1\_ANGII} = \left( \frac{AT1\_ANGII_{norm}}{AT1\_ANGII} \right)^{slope_{AT1\_PRC}}$                                                                   | Effect of AT1-bound angiotensin II ( $AT1\_ANGII$ ) on the rate of renin secretion $R_{sec}$ . $AT1\_ANGII_{norm}$ is the normal level of $AT1\_ANGII$ . $slope_{AT1\_PRC}$ is a constant.                                                                                                                                                                                                         | Hallow<br>2017a   |
| 116                | $\frac{dPRC}{dt} = R_{sec} - \frac{\ln 2}{h_{renin}} \cdot PRC$                                                                                             | Plasma renin concentration ( $PRC$ ) is described by the renin secretion rate $R_{sec}$ and the renin clearance rate with the half-life of $h_{renin}$ .                                                                                                                                                                                                                                           | Hallow<br>2014    |
| 117                | $PRC(0) = PRC_{nom}$                                                                                                                                        | Initial $PRC$ value is the nominal value $PRC_{nom}$ .                                                                                                                                                                                                                                                                                                                                             | –                 |
| <b>Angiotensin</b> |                                                                                                                                                             |                                                                                                                                                                                                                                                                                                                                                                                                    |                   |
| 118                | $PRA = PRC \cdot X_{PRC\_PRA}$                                                                                                                              | Plasma renin activity ( $PRA$ ).<br>$X_{PRC\_PRA}$ – equilibrium ratio of $PRA$ to $PRC$ .                                                                                                                                                                                                                                                                                                         | Hallow<br>2014    |
| 119                | $\frac{dANGI}{dt} = PRA - (c_{ACE} + c_{chym} + c_{nep}) \cdot ANGI - \frac{\ln 2}{h_{ANGI}} \cdot ANGI$                                                    | Rate of change in the concentration of angiotensin I ( $ANGI$ ).<br>$c_{ACE}$ and $c_{chym}$ – the constant rates of $ANGI$ conversion to angiotensin II by ACE and by chymases, respectively.<br>$c_{nep}$ – the constant rate of $ANGI$ conversion to angiotensin-(1-7) by neprilisin.<br>$h_{ANGI}$ – the half-life of $ANGI$ .                                                                 | Hallow<br>2014    |
| 120                | $\frac{dANGII}{dt} = (c_{ACE} + c_{chym}) \cdot ANGI - (c_{ACE2} + c_{ANGII\_ANGIV} + c_{AT1} + c_{AT2}) \cdot ANGII - \frac{\ln 2}{h_{ANGII}} \cdot ANGII$ | Rate of change in the concentration of angiotensin II ( $ANGII$ ).<br>$c_{ACE2}$ – the constant rate of $ANGII$ conversion to angiotensin-(1-7) by ACE2.<br>$c_{ANGII\_ANGIV}$ – the constant rate of $ANGII$ conversion to angiotensin IV.<br>$c_{AT1}$ and $c_{AT2}$ – the constant rates of $ANGII$ binding to AT1 and AT2 receptors, respectively.<br>$h_{ANGII}$ – the half-life of $ANGII$ . | Hallow<br>2014    |
| 121                | $\frac{dANG17}{dt} = c_{nep} \cdot ANGI + c_{ACE2} \cdot ANGII - \frac{\ln 2}{h_{ANG17}} \cdot ANG17$                                                       | Rate of angiotensin-(1-7) ( $ANG17$ ) production by the converting of $ANGI$ or $ANGII$ , and clearance with the half-life of $h_{ANG17}$ .                                                                                                                                                                                                                                                        | Hallow<br>2014    |
| 122                | $\frac{dANGIV}{dt} = c_{ANGII\_ANGIV} \cdot ANGII - \frac{\ln 2}{h_{ANGIV}} \cdot ANGIV$                                                                    | Rate of angiotensin IV ( $ANGIV$ ) production by the converting of $ANGII$ , and clearance with the half-life of $h_{ANGIV}$ .                                                                                                                                                                                                                                                                     | Hallow<br>2014    |
| 123                | $\frac{dAT1\_ANGII}{dt} = c_{AT1} \cdot ANGII - \frac{\ln 2}{h_{AT1}} \cdot AT1\_ANGII$                                                                     | Rate of AT1-bound angiotensin II complex formation ( $AT1\_ANGII$ ) and its clearance with the half-life of $h_{AT1}$ .                                                                                                                                                                                                                                                                            | Hallow<br>2014    |

|                    |                                                                                         |                                                                                                                                                                                                                                                                                                                                                                                                                                                                                                                                                                                                                                                                                                                                                                                                                                                                                                                                                                                                                                                                                                                                                                                                                                                                                                                                                                                                                                                                                                                                                                                                                                                                                |                   |
|--------------------|-----------------------------------------------------------------------------------------|--------------------------------------------------------------------------------------------------------------------------------------------------------------------------------------------------------------------------------------------------------------------------------------------------------------------------------------------------------------------------------------------------------------------------------------------------------------------------------------------------------------------------------------------------------------------------------------------------------------------------------------------------------------------------------------------------------------------------------------------------------------------------------------------------------------------------------------------------------------------------------------------------------------------------------------------------------------------------------------------------------------------------------------------------------------------------------------------------------------------------------------------------------------------------------------------------------------------------------------------------------------------------------------------------------------------------------------------------------------------------------------------------------------------------------------------------------------------------------------------------------------------------------------------------------------------------------------------------------------------------------------------------------------------------------|-------------------|
| 124                | $\frac{dAT2\_ANGII}{dt} = c_{AT2} \cdot ANGII - \frac{\ln 2}{h_{AT2}} \cdot AT2\_ANGII$ | Rate of AT2-bound angiotensin II complex formation ( <i>AT2_ANGII</i> ) and its clearance with the half-life of $h_{AT2}$ .                                                                                                                                                                                                                                                                                                                                                                                                                                                                                                                                                                                                                                                                                                                                                                                                                                                                                                                                                                                                                                                                                                                                                                                                                                                                                                                                                                                                                                                                                                                                                    | Hallow<br>2014    |
| <b>Aldosterone</b> |                                                                                         |                                                                                                                                                                                                                                                                                                                                                                                                                                                                                                                                                                                                                                                                                                                                                                                                                                                                                                                                                                                                                                                                                                                                                                                                                                                                                                                                                                                                                                                                                                                                                                                                                                                                                |                   |
| 125                | $N_{als} = \xi_{k\_sod} \cdot \xi_{map} \cdot \xi_{at}$                                 | Normalized aldosterone secretion rate $N_{als}$ is calculated by the product of the factors representing different effects described below.<br>$\xi_{map}$ is the effect of mean arterial pressure <i>MAP</i> on $N_{als}$ ;<br>$\xi_{map} = 1$ (no effect) if <i>MAP</i> is above normal.                                                                                                                                                                                                                                                                                                                                                                                                                                                                                                                                                                                                                                                                                                                                                                                                                                                                                                                                                                                                                                                                                                                                                                                                                                                                                                                                                                                     | Karaaslan<br>2005 |
| 126                | $\xi_{k\_sod} = 2^{C_K - 4.5}$                                                          | In the model [Karaaslan, 2005], the factor $\xi_{k\_sod}$ characterizes the effect of potassium ( $C_K$ ) to sodium ( $C_{sod}$ ) concentration ratio on $N_{als}$ , and<br>$\xi_{k\_sod} = \max\left(0, \frac{1}{0.003525} \cdot \frac{C_K}{C_{sod}} - 9\right).$<br>In the case $C_K \leq 0.031725 \cdot C_{sod}$ , we have $\xi_{k\_sod} = 0$ . Thus, considering the physiological norms of 3.5 – 5.5 mEq/L for $C_K$ [Rastegar] and 137 – 147 mEq/L for $C_{sod}$ [Payne], we find that the values $3.5 < C_K < 4.3$ completely block aldosterone secretion. However, studies [Chen] and [Kojima] using bovine cells showed that extremely low potassium levels (2 mmol/L) actually reduce aldosterone production stimulated by angiotensin II, but does not stop it completely. In addition, a low-sodium diet does not directly affect the aldosterone secretion, but indirectly through activation of the renin-angiotensin-aldosterone system, upregulation of AT1 receptor levels, and hyperplasia of the zona glomerulosa [Bollag]. Therefore, we did not consider a value $C_{sod}$ in the formula for $\xi_{k\_sod}$ . Since a rise of 1 mmol/L in serum potassium concentration doubles the aldosterone secretion [Pralong], [Bollag], we used a power of two as the function of the $C_K$ effect on $N_{als}$ . We normalized this function so that the average normal value $C_K = 4.5$ mEq/L had an effect equal to 1. Note that the values of $\xi_{k\_sod}$ are in agreement with the values used in the model of human physiology HumMod (version 1.6.1) [Pruett]: $\xi_{k\_sod}(3.0) = 0.3$ , $\xi_{k\_sod}(4.4) = 1.0$ , and $\xi_{k\_sod}(6.0) = 3.0$ . | —                 |

|                        |                                                                                                                                                                                                                                                           |                                                                                                                                                                                                                                                                                                                                                                                                                                                                                                                                                                                                                                                                                             |                   |
|------------------------|-----------------------------------------------------------------------------------------------------------------------------------------------------------------------------------------------------------------------------------------------------------|---------------------------------------------------------------------------------------------------------------------------------------------------------------------------------------------------------------------------------------------------------------------------------------------------------------------------------------------------------------------------------------------------------------------------------------------------------------------------------------------------------------------------------------------------------------------------------------------------------------------------------------------------------------------------------------------|-------------------|
| 127                    | $\xi_{at} = 0.4 + 2.4 \cdot \left( 1 + \exp \left( 2.82 - 1.5 \cdot \frac{\log AT1\_ANGII}{0.8} \right) \right)^{-1}$                                                                                                                                     | Effect of AT1-bound angiotensin II ( <i>AT1_ANGII</i> ) on the rate of aldosterone secretion.                                                                                                                                                                                                                                                                                                                                                                                                                                                                                                                                                                                               | Karaaslan<br>2005 |
| 128                    | $\frac{dN_{al}}{dt} = \frac{N_{als} - N_{al}}{T_{al}}$                                                                                                                                                                                                    | Calculation of the normalized aldosterone concentration $N_{al}$ using the time constant $T_{al}$ .                                                                                                                                                                                                                                                                                                                                                                                                                                                                                                                                                                                         | Karaaslan<br>2005 |
| 129                    | $C_{al} = C_{al\_norm} \cdot N_{al}$                                                                                                                                                                                                                      | Plasma aldosterone concentration $C_{al}$ is equal to the product of its normalized concentration $N_{al}$ and the normal value $C_{al\_norm}$ .                                                                                                                                                                                                                                                                                                                                                                                                                                                                                                                                            | Karaaslan<br>2005 |
| <b>Hormonal system</b> |                                                                                                                                                                                                                                                           |                                                                                                                                                                                                                                                                                                                                                                                                                                                                                                                                                                                                                                                                                             |                   |
| 130                    | $C_{anp} = C_{anp\_norm} \cdot \left( 7.427 - \frac{6.554}{1 + \exp(P_{ra} - 3.762)} \right)$                                                                                                                                                             | Concentration of atriopeptin $C_{anp}$ depends on the right atrial pressure $P_{ra}$ and the normal level of the hormone $C_{anp\_norm}$ .                                                                                                                                                                                                                                                                                                                                                                                                                                                                                                                                                  | Karaaslan<br>2005 |
| 131                    | $osmolality = 1.86 \cdot C_{sod} + glucose + urea + 9$                                                                                                                                                                                                    | Serum osmolality ( <i>osmolality</i> ) is the function of the sodium concentration $C_{sod}$ , as well as the levels of glucose ( <i>glucose</i> ) and urea ( <i>urea</i> ) in blood.                                                                                                                                                                                                                                                                                                                                                                                                                                                                                                       | Dorwart<br>Bhagat |
| 132                    | $C_{adh} = \max(0, 0.23 \cdot (osmolality - 271))$                                                                                                                                                                                                        | Antidiuretic hormone (vasopressin) concentration $C_{adh}$ depends on the serum osmolality.                                                                                                                                                                                                                                                                                                                                                                                                                                                                                                                                                                                                 | Hammer            |
| <b>Diuresis</b>        |                                                                                                                                                                                                                                                           |                                                                                                                                                                                                                                                                                                                                                                                                                                                                                                                                                                                                                                                                                             |                   |
| 133                    | $\Phi_{t\_wreab} = \eta_{pt\_sodreab} \cdot GFR + (1 - \eta_{pt\_sodreab}) \cdot GFR \cdot \mu_{adh}$                                                                                                                                                     | Tubular water reabsorption rate $\Phi_{t\_wreab}$ depends on the glomerular filtration rate $GFR$ . In the absence of significant amounts of poorly reabsorbable solutes, the fraction of the water load passively reabsorbed in the proximal tubule is equal to the fraction of the sodium load reabsorbed $\eta_{pt\_sodreab}$ [Uttamsingh]. Taking into account details of laboratory measurements, this fraction also includes sodium reabsorbed in the loop of Henle [Seidlerová]. The rate of fluid reabsorption from the distal tubules and collecting ducts (the second term in the formula) depends on the influence of plasma vasopressin concentration $\mu_{adh}$ [Uttamsingh]. | —                 |
| 134                    | $\mu_{adh} = \begin{cases} 0.0, & C_{adh} \leq 0.765 \\ 0.383 \cdot C_{adh} - 0.293, & 0.765 < C_{adh} \leq 3 \\ -0.0383 \cdot C_{adh}^2 + 0.364 \cdot C_{adh} + 0.109, & 3 < C_{adh} \leq 5 \\ 0.0012 \cdot C_{adh} + 0.9653, & C_{adh} > 5 \end{cases}$ | Effect of plasma vasopressin concentration $C_{adh}$ on the rate of fluid reabsorption from distal tubules and collecting ducts based on the experimental data [Dehaven].                                                                                                                                                                                                                                                                                                                                                                                                                                                                                                                   | Uttamsingh        |

|                              |                                                                                                                                                             |                                                                                                                                                                                                                                                                                                                                                                                                                            |                   |
|------------------------------|-------------------------------------------------------------------------------------------------------------------------------------------------------------|----------------------------------------------------------------------------------------------------------------------------------------------------------------------------------------------------------------------------------------------------------------------------------------------------------------------------------------------------------------------------------------------------------------------------|-------------------|
| 135                          | $\Phi_u = GFR - \Phi_{t\_wreab}$                                                                                                                            | Urine flow rate $\Phi_u$ is the difference between the glomerular filtration rate and the tubular water reabsorption rate.                                                                                                                                                                                                                                                                                                 | Karaaslan<br>2005 |
| <b>Body fluids</b>           |                                                                                                                                                             |                                                                                                                                                                                                                                                                                                                                                                                                                            |                   |
| 136                          | $\Phi_{win} = \Phi_{win\_norm} \cdot \left( 0.25 + 1.5 \cdot \left( 1 + \exp \left( 2 - 2 \cdot \frac{C_{adh}}{C_{adh\_norm}} \right) \right)^{-1} \right)$ | Water intake $\Phi_{win}$ is the function taking the nominal value of water consumption $\Phi_{win\_norm}$ and the normalized level of vasopressin concentration $C_{adh}$ .                                                                                                                                                                                                                                               | Hallow<br>2017a   |
| 137                          | $\frac{dTBW}{dt} = \Phi_{win} - \Phi_u$                                                                                                                     | Total body water $TBW$ is calculated using the difference between water intake $\Phi_{win}$ and urine flow $\Phi_u$ .                                                                                                                                                                                                                                                                                                      | –                 |
| 138                          | $V = 111.5 \cdot TBW + 650$                                                                                                                                 | Total blood volume $V$ as the linear function of $TBW$ .                                                                                                                                                                                                                                                                                                                                                                   | Moore<br>1967     |
| 139                          | $V_{ecf} = 0.37 \cdot TBW + 2.7$                                                                                                                            | Extracellular fluid volume $V_{ecf}$ as the linear function of $TBW$ .                                                                                                                                                                                                                                                                                                                                                     | Moore<br>1967     |
| <b>Glomerular filtration</b> |                                                                                                                                                             |                                                                                                                                                                                                                                                                                                                                                                                                                            |                   |
| 140                          | $R_{aa} = R_{aa\_0} \cdot \beta_{rsna} \cdot \Sigma_{tgf} \cdot \Sigma_{myo} \cdot \Psi_{AT1\_aa}$                                                          | Single afferent arteriole resistance $R_{aa}$ is equal to the nominal value $R_{aa\_0}$ multiplied by the factors representing various effects listed below.                                                                                                                                                                                                                                                               | Hallow<br>2014    |
| 141                          | $R_{aa\_0} = 1.25E8 \cdot \frac{128 \cdot Vis \cdot L_{aa}}{\pi \cdot d_{aa}^4}$                                                                            | Nominal value of the single afferent arteriole resistance $R_{aa\_0}$ can be defined according to the Poiseuille's law based on the arteriole diameter $d_{aa}$ , length $L_{aa}$ , and blood viscosity $Vis$ . The coefficient 1.25E8 is used to convert units from $cP \cdot \mu m^{-3}$ to $mmHg \cdot min \cdot l^{-1}$ :<br>1 cP = $10^{-3}$ Pa·s, 1 Pa = 0.00750062 mmHg, 1 m <sup>3</sup> = 10 <sup>3</sup> liters. | Hallow<br>2017a   |
| 142                          | $\beta_{rsna} = 1.5 \cdot (RSNA - 1) + 1$                                                                                                                   | Effect of the renal sympathetic nerve activity $RSNA$ on $R_{aa}$ and $R_{preglom}$ .                                                                                                                                                                                                                                                                                                                                      | Karaaslan<br>2005 |

|     |                                                                                                                                                           |                                                                                                                                                                                                                                                                                                                                                                                                                                                                                                                                                                                                                                                                                                                                                                                                                                                                                                                         |                             |
|-----|-----------------------------------------------------------------------------------------------------------------------------------------------------------|-------------------------------------------------------------------------------------------------------------------------------------------------------------------------------------------------------------------------------------------------------------------------------------------------------------------------------------------------------------------------------------------------------------------------------------------------------------------------------------------------------------------------------------------------------------------------------------------------------------------------------------------------------------------------------------------------------------------------------------------------------------------------------------------------------------------------------------------------------------------------------------------------------------------------|-----------------------------|
| 143 | $\frac{d\Sigma_{t_{gf}}}{dt} = 0.3408 + 3.449 \cdot \left( 3.88 + \exp\left(\frac{\Phi_{md\_sod} - 3.859}{-0.9617}\right) \right)^{-1} - \Sigma_{t_{gf}}$ | Tubuloglomerular feedback signal is modeled as the function of macula densa sodium flow $\Phi_{md\_sod}$ .                                                                                                                                                                                                                                                                                                                                                                                                                                                                                                                                                                                                                                                                                                                                                                                                              | Karaaslan 2005 <sup>7</sup> |
| 144 | $\frac{d\Sigma_{myo}}{dt} = sI_{P_{gh}} \cdot \frac{P_{gh}}{P_{gh\_norm}} + 1 - sI_{P_{gh}} - \Sigma_{myo}$                                               | Myogenic autoregulation signal $\Sigma_{myo}$ is calculated according to [Hallow, 2014] by the formula:<br>$\Sigma_{myo} = c_{GP\_autoreg} \cdot \left( \frac{P_{gh}}{P_{gh\_nom}} - 1 \right)$ with the constants $c_{GP\_autoreg} = 5$ and $P_{gh\_nom} = 60$ mmHg. In the case of values $P_{gh} < 60$ mmHg within the normal range [Škrtić], this formula gives the negative values for $R_{aa}$ and $R_{preglom}$ , however, this contradicts the physiological meaning of these variables. In this regard, we introduced 1 as a term in the right side of the formula, and as the result for $P_{gh} = 60$ mmHg, we received the signal $\Sigma_{myo} = 1$ . Further, by analogy with $\Sigma_{t_{gf}}$ , we converted the algebraic equation for $\Sigma_{myo}$ to the differential one in order to remove the cyclical dependency of $R_{aa}$ , $P_{gh}$ , $\Sigma_{myo}$ , $RBF$ , $R_a$ , and $R_{preglom}$ . | –                           |
| 145 | $\Psi_{AT1\_aa} = A_{AT1\_aa} + B_{AT1\_aa} \cdot AT1\_ANGII - \frac{C_{AT1\_aa}}{AT1\_ANGII}$                                                            | Effect of AT1-bound angiotensin II ( $AT1\_ANGII$ ) on $R_{aa}$ . $A_{AT1\_aa}$ , $B_{AT1\_aa}$ , and $C_{AT1\_aa}$ are constant.                                                                                                                                                                                                                                                                                                                                                                                                                                                                                                                                                                                                                                                                                                                                                                                       | Hallow 2014                 |
| 146 | $R_{preglom} = R_{preglom\_0} \cdot \beta_{rsna} \cdot \Sigma_{myo} \cdot \Psi_{AT1\_preglom}$                                                            | Resistance of interlobar, arcuate, and interlobular arteries $R_{preglom}$ is equal to the nominal value $R_{preglom\_0}$ multiplied by the factors representing various effects listed below.                                                                                                                                                                                                                                                                                                                                                                                                                                                                                                                                                                                                                                                                                                                          | Hallow 2014                 |
| 147 | $\Psi_{AT1\_preglom} = A_{AT1\_preglom} + B_{AT1\_preglom} \cdot AT1\_ANGII - \frac{C_{AT1\_preglom}}{AT1\_ANGII}$                                        | Effect of AT1-bound angiotensin II ( $AT1\_ANGII$ ) on $R_{preglom}$ . $A_{AT1\_preglom}$ , $B_{AT1\_preglom}$ , and $C_{AT1\_preglom}$ are constant.                                                                                                                                                                                                                                                                                                                                                                                                                                                                                                                                                                                                                                                                                                                                                                   | Hallow 2014                 |

<sup>7</sup> In the model [Karaaslan, 2005], the formula is determined as  $\Sigma_{t_{gf}} = 0.3408 + 3.449 \cdot \left( 3.88 + \exp\left(-(\Phi_{md\_sod} - 3.859)/0.9617\right) \right)^{-1}$ . In this case, the equations for  $\Sigma_{t_{gf}}$ ,  $\Phi_{rb}$ ,  $\Phi_{md\_sod}$ ,  $\Phi_{filsod}$ ,  $\Phi_{gflt}$ ,  $\Phi_{pt\_sodreab}$ ,  $R_{aa}$ ,  $P_{gh}$ ,  $\gamma_{filsod}$  and  $\eta_{pt\_sodreab}$  form a cyclical dependency. Since the algebraic solver in BioUML (the software used for our modeling) is slower and more likely to loop than the differential equation solver, and this can be significant for the model optimization during generation of virtual populations, we converted the algebraic equation to the differential one by the scheme:  $\Sigma_{t_{gf}} = f(\Phi_{md\_sod}) \Rightarrow d\Sigma_{t_{gf}}/dt = 1/T \cdot (f(\Phi_{md\_sod}) - \Sigma_{t_{gf}})$ . Such conversion means that  $\Sigma_{t_{gf}}$  takes a value  $f(\Phi_{md\_sod})$  not immediately, but with the delay  $T$ . This approach is used, for example, in [Kofranek].

|     |                                                                                                                      |                                                                                                                                                                                                                                                                                                                                                                                                 |                 |
|-----|----------------------------------------------------------------------------------------------------------------------|-------------------------------------------------------------------------------------------------------------------------------------------------------------------------------------------------------------------------------------------------------------------------------------------------------------------------------------------------------------------------------------------------|-----------------|
| 148 | $R_a = \frac{R_{aa}}{N_{nephrons}} + R_{preglom}$                                                                    | Resistance of afferent vessels $R_a$ is equal to the sum of $R_{preglom}$ and the resistance of all afferent arterioles (which number is $N_{nephrons}$ ).                                                                                                                                                                                                                                      | Hallow<br>2014  |
| 149 | $R_{a\_dyne} = 79.68 \cdot R_a$                                                                                      | Conversion $R_a$ units from $\text{mmHg} \cdot \text{min} \cdot \text{l}^{-1}$ to $\text{dyn} \cdot \text{s} \cdot \text{cm}^{-5}$ :<br>$\frac{\text{mmHg} \cdot \text{min}}{1} = \frac{60}{1000} \cdot \frac{\text{mmHg} \cdot \text{s}}{\text{ml}} = \frac{60}{1000} \cdot 1328 \cdot \frac{\text{dyn} \cdot \text{s}}{\text{cm}^5}$ using the coefficient 1328 taken from the work [Škrtić]. | –               |
| 150 | $R_{ea} = R_{ea\_0} \cdot \Psi_{AT1\_ea}$                                                                            | Single efferent arteriole resistance $R_{ea}$ is equal to the nominal value $R_{ea\_0}$ multiplied by the factors representing various effects listed below.                                                                                                                                                                                                                                    | Hallow<br>2014  |
| 151 | $R_{ea\_0} = 1.25E8 \cdot \frac{128 \cdot Vis \cdot L_{ea}}{\pi \cdot d_{ea}^4}$                                     | Nominal value of the single efferent arteriole resistance $R_{ea\_0}$ can be defined according to the Poiseuille's law based on the arteriole diameter $d_{ea}$ , length $L_{ea}$ , and blood viscosity $Vis$ . The coefficient 1.25E8 is used similar to $R_{aa\_0}$ .                                                                                                                         | Hallow<br>2017a |
| 152 | $\Psi_{AT1\_ea} = A_{AT1\_ea} + B_{AT1\_ea} \cdot AT1\_ANGII - \frac{C_{AT1\_ea}}{AT1\_ANGII}$                       | Effect of AT1-bound angiotensin II ( $AT1\_ANGII$ ) on $R_{ea}$ .<br>$A_{AT1\_ea}$ , $B_{AT1\_ea}$ , and $C_{AT1\_ea}$ are constants.                                                                                                                                                                                                                                                           | Hallow<br>2014  |
| 153 | $R_e = \frac{R_{ea}}{N_{nephrons}}$                                                                                  | Resistance of all efferent arterioles $R_e$ (which number is $N_{nephrons}$ ).                                                                                                                                                                                                                                                                                                                  | Hallow<br>2014  |
| 154 | $R_{e\_dyne} = 79.68 \cdot R_e$                                                                                      | Conversion of $R_e$ units from $\text{mmHg} \cdot \text{min} \cdot \text{l}^{-1}$ to $\text{dyn} \cdot \text{s} \cdot \text{cm}^{-5}$ (as for $R_a$ ).                                                                                                                                                                                                                                          | –               |
| 155 | $RVR = R_a + \frac{RBF - GFR}{RBF} \cdot R_e + R_v$                                                                  | Renal vascular resistance $RVR$ is equal to the sum of $R_a$ , $R_e$ (with a coefficient characterizing decrease in $RBF$ through the efferent arterioles due to the glomerular filtration rate $GFR$ ) and the constant renal venous resistance $R_v$ .                                                                                                                                        | Gómez           |
| 156 | $RBF = \frac{MAP - P_v + K_{FG} \cdot R_e \cdot (MAP - P_B - P_{go})}{R_a + R_e + R_v + K_{FG} \cdot R_e \cdot R_a}$ | Calculation of the renal blood flow $RBF$ . For the formula derivation, see appendix B.                                                                                                                                                                                                                                                                                                         | App. B          |
| 157 | $P_{gh} = MAP - RBF \cdot R_a$                                                                                       | Calculation of the glomerular hydrostatic pressure $P_{gh}$ according to the Ohm's law.                                                                                                                                                                                                                                                                                                         | Gómez           |
| 158 | $RPF = RBF \cdot (1 - 0.01 \cdot Hct)$                                                                               | Effective renal plasma flow $RPF$ is determined from hematocrit $Hct$ and the $RBF$ value.                                                                                                                                                                                                                                                                                                      | Škrtić          |



|     |                                                                                                             |                                                                                                                                                                                                                                                                                                                                                                                                                                                                                                                                                                                                                                                                                 |        |
|-----|-------------------------------------------------------------------------------------------------------------|---------------------------------------------------------------------------------------------------------------------------------------------------------------------------------------------------------------------------------------------------------------------------------------------------------------------------------------------------------------------------------------------------------------------------------------------------------------------------------------------------------------------------------------------------------------------------------------------------------------------------------------------------------------------------------|--------|
| 159 | $FF = \frac{GFR}{RPF}$                                                                                      | Filtration fraction $FF$ is the ratio of the glomerular filtration rate $GFR$ to the renal plasma flow $RPF$ .                                                                                                                                                                                                                                                                                                                                                                                                                                                                                                                                                                  | Škrtić |
| 160 | $C_M = 0.1 \cdot \frac{TP}{FF} \cdot \ln\left(\frac{1}{1 - FF}\right)$                                      | Plasma protein mean concentration within the glomerular capillaries $C_M$ depends on the total protein level $TP$ and the value of $FF$ .                                                                                                                                                                                                                                                                                                                                                                                                                                                                                                                                       | Škrtić |
| 161 | $\frac{dP_{go}}{dt} = 5 \cdot (C_M - 2) - P_{go}$                                                           | Glomerular capillary oncotic pressure $P_{go}$ is defined by the value of $C_M$ .                                                                                                                                                                                                                                                                                                                                                                                                                                                                                                                                                                                               | Škrtić |
| 162 | $K_{FG} = K_{FG_0} \cdot \left( sl_{KFG} \cdot \frac{AT1\_ANGII_{norm}}{AT1\_ANGII} + 1 - sl_{KFG} \right)$ | Angiotensin II provides a reduction in the glomerular filtration coefficient $K_{FG}$ [Blantz] via decrease in the total filtering surface area because of mesangial cell contraction [Schmitt]. Angiotensin II receptors on mesangial cells belong to the AT1 subtype [Ardaillou]. Thus, for calculation of $K_{FG}$ , we considered the product of the normal value $K_{FG_0}$ and the linear function (with a slope $0 < sl_{KFG} < 1$ ) expressing inversely proportional relationship between $K_{FG}$ and the normalized concentration of $AT1\_ANGII$ . The function is chosen so that the value $AT1\_ANGII = AT1\_ANGII_{norm}$ gives the result $K_{FG} = K_{FG_0}$ . | –      |
| 163 | $GFR = K_{FG} \cdot (P_{gh} - P_B - P_{go})$                                                                | Glomerular filtration rate $GFR$ depends on $P_{gh}$ , $P_{go}$ , the hydrostatic pressure in the Bowman's space $P_B$ , and the filtration coefficient $K_{FG}$ .                                                                                                                                                                                                                                                                                                                                                                                                                                                                                                              | Gómez  |

**Table A3.** List of the model constants with values for a healthy person.

| №   | Parameters | Entity                                                                  | Pathological conditions and factors affecting the value                                                                                                | Initial values |                                        | Reference values                  |         | Units                                  |
|-----|------------|-------------------------------------------------------------------------|--------------------------------------------------------------------------------------------------------------------------------------------------------|----------------|----------------------------------------|-----------------------------------|---------|----------------------------------------|
|     |            |                                                                         |                                                                                                                                                        | Values         | Sources                                | Norms                             | Sources |                                        |
| 001 | $A_1$      | Total metabolic intensity                                               | Age, weight [Henry]                                                                                                                                    | 0.0008         | Proshin<br>MATLAB                      | 0.00032 –<br>0.00128 <sup>8</sup> | –       | ml <sup>-1</sup>                       |
| 002 | $A_{10}$   | –                                                                       | –                                                                                                                                                      | 0.8            | Proshin<br>MATLAB                      | –                                 | –       | ml·s <sup>-1</sup> ·mmHg <sup>-2</sup> |
| 003 | $A_{11}$   | Systemic and pulmonary venous tone                                      | Changing the sensitivity of venous vessel walls to nervous and hormonal influences [S-D]                                                               | 0.0325         | Proshin<br>MATLAB                      | –                                 | –       | ml·mmHg <sup>-1</sup>                  |
| 004 | $A_{12}$   | Reactivity of cardiac center                                            | –                                                                                                                                                      | 0.19336        | Proshin<br>MATLAB                      | –                                 | –       | s <sup>-1</sup>                        |
| 005 | $A_{13}$   | Sympathetic sensitivity of the pulmonary microvessels                   | Changing the sensitivity of pulmonary microvessels to nervous and hormonal influences [S-D]                                                            | 0.65           | Proshin<br>MATLAB                      | –                                 | –       | ml·mmHg <sup>-1</sup>                  |
| 006 | $A_{14}$   | Pulmonary microvessel sensitivity to oxygen debt                        | –                                                                                                                                                      | 0.08265        | Proshin<br>MATLAB                      | –                                 | –       | s <sup>-1</sup> ·mmHg <sup>-1</sup>    |
| 007 | $A_{15}$   | –                                                                       | –                                                                                                                                                      | 22.0           | Proshin<br>MATLAB                      | –                                 | –       | s <sup>-1</sup> ·mmHg <sup>-1</sup>    |
| 008 | $A_{16}$   | –                                                                       | –                                                                                                                                                      | 3.3            | Proshin<br>MATLAB                      | –                                 | –       | ml·s <sup>-1</sup> ·mmHg <sup>-2</sup> |
| 009 | $A_{18}$   | Sympathetic sensitivity of the pulmonary arteries, $A_{18} < A_8$ [S-D] | Pulmonary vasospasm [S-D]                                                                                                                              | 40.0           | Proshin<br>MATLAB                      | –                                 | –       | ml·s                                   |
| 010 | $A_{19}$   | Pulmonary arterial tone, $A_{19} < A_9$ [S-D]                           | Changing the elastic properties of the pulmonary artery walls [S-D]                                                                                    | 0.02 (0.06)    | FP <sup>9</sup><br>(Proshin<br>MATLAB) | –                                 | –       | mmHg·s·ml <sup>-1</sup>                |
| 011 | $A_2$      | Organism functional status                                              | Low tolerance to the exercise stress in metabolic disorders (hyperthyroidism, hypothyroidism, diabetes mellitus), asthenic conditions and others [S-D] | 0.3752         | Proshin<br>MATLAB                      | –                                 | –       | –                                      |
| 012 | $A_3$      | Sympathetic sensitivity of the systemic microvessels                    | Vegetative-vascular crisis, hypertension [S-D]                                                                                                         | 0.1            | Proshin<br>MATLAB                      | –                                 | –       | ml·mmHg <sup>-1</sup>                  |

<sup>8</sup> We took the initial value  $A_1 = 0.0008 \text{ ml}^{-1}$  from the Proshin and Solodyannikov model implementation in MATLAB and considered its deviation within a virtual population by 60%, which in accordance with [Henry] is the allowable fluctuation in the basal metabolic rate (closely related to the oxygen consumption) in people with the same weight.

<sup>9</sup> The “FP” (fitted parameter) notation means that the corresponding value was identified so that the model dynamics in the case of a healthy person lies within physiological norms given in Table A4 below.

|     |                     |                                                                                                              |                                                        |                                                       |                     |                  |         |                                                 |
|-----|---------------------|--------------------------------------------------------------------------------------------------------------|--------------------------------------------------------|-------------------------------------------------------|---------------------|------------------|---------|-------------------------------------------------|
| 013 | $A_4$               | Systemic microvessel sensitivity to oxygen debt                                                              | Vegetative-vascular crisis [S-D]                       | 0.031537                                              | Proshin<br>MATLAB   | –                | –       | $s^{-1} \cdot \text{mmHg}^{-1}$                 |
| 014 | $A_5$               | –                                                                                                            | –                                                      | 22.0                                                  | Proshin<br>MATLAB   | –                | –       | $s \cdot \text{mmHg}^{-1}$                      |
| 015 | $A_6$               | –                                                                                                            | –                                                      | 3.3                                                   | Proshin<br>MATLAB   | –                | –       | $\text{ml} \cdot s^{-1} \cdot \text{mmHg}^{-2}$ |
| 016 | $A_7$               | –                                                                                                            | –                                                      | 4.0                                                   | Proshin<br>MATLAB   | –                | –       | $\text{mmHg}^{-1}$                              |
| 017 | $A_8$               | Sympathetic sensitivity of the systemic arteries, $A_8 > A_{18}$ [S-D]                                       | Vascular spasm, e.g., vascular collapse [S-D]          | 45.0                                                  | Proshin<br>MATLAB   | –                | –       | $\text{ml} \cdot s$                             |
| 018 | $A_9$               | Systemic arterial tone, $A_9 > A_{19}$ [S-D]                                                                 | Neurocirculatory dystonia [S-D], hypertension [Amberg] | 0.07                                                  | Proshin<br>MATLAB   | –                | –       | $\text{mmHg} \cdot s \cdot \text{ml}^{-1}$      |
| 019 | $A_{AT1\_aa}$       | Constant for AT1-bound angiotensin II effect on afferent arteriole resistance                                | –                                                      | 1.3754 (0.8)                                          | FP (Hallow<br>2014) | –                | –       | –                                               |
| 020 | $A_{AT1\_ALVL}$     | Constant for AT1-bound angiotensin II effect on blood flow through systemic microvessels                     | –                                                      | 1.7323                                                | FP                  | –                | –       | –                                               |
| 021 | $A_{AT1\_ea}$       | Constant for AT1-bound angiotensin II effect on efferent arteriole resistance                                | –                                                      | 1.6601 (0.925)                                        | FP (Hallow<br>2014) | –                | –       | –                                               |
| 022 | $A_{AT1\_preglom}$  | Constant for AT1-bound angiotensin II effect on resistance of interlobar, arcuate, and interlobular arteries | –                                                      | 0.4464 (0.8)                                          | FP (Hallow<br>2014) | –                | –       | –                                               |
| 023 | $AO_2$              | Arterial oxygen content                                                                                      | –                                                      | $\frac{He \cdot C_H \cdot SpO_2}{1000} \approx 0.188$ | S-D                 | 0.145 –<br>0.244 | Hattori | –                                               |
| 024 | $AT1\_ANGII_{norm}$ | The normal level of AT1-bound angiotensin II                                                                 | –                                                      | 16.63                                                 | Hallow<br>2017a     | –                | –       | $\text{fmol} \cdot \text{ml}^{-1}$              |
| 025 | $B_{AT1\_aa}$       | Constant for AT1-bound angiotensin II effect on afferent arteriole resistance                                | –                                                      | 0.0549 (0.055)                                        | FP (Hallow<br>2014) | –                | –       | –                                               |
| 026 | $B_{AT1\_ALVL}$     | Constant for AT1-bound angiotensin II effect on blood flow through systemic microvessels                     | –                                                      | 0.0032                                                | FP                  | –                | –       | –                                               |
| 027 | $B_{AT1\_ea}$       | Constant for AT1-bound angiotensin II effect on efferent arteriole resistance                                | –                                                      | 0.0383 (0.05)                                         | FP (Hallow<br>2014) | –                | –       | –                                               |

|     |                    |                                                                                                              |                                                                                                                                             |                |                  |             |                |                     |
|-----|--------------------|--------------------------------------------------------------------------------------------------------------|---------------------------------------------------------------------------------------------------------------------------------------------|----------------|------------------|-------------|----------------|---------------------|
| 028 | $B_{AT1\_preglom}$ | Constant for AT1-bound angiotensin II effect on resistance of interlobar, arcuate, and interlobular arteries | –                                                                                                                                           | 0.0661 (0.055) | FP (Hallow 2014) | –           | –              | –                   |
| 029 | $c_{ACE}$          | Rate of conversion of angiotensin I to angiotensin II by ACE                                                 | –                                                                                                                                           | 0.9016666      | Hallow 2014      | –           | –              | min <sup>-1</sup>   |
| 030 | $c_{ACE2}$         | Rate of conversion of angiotensin II to angiotensin-(1-7) by ACE2                                            | –                                                                                                                                           | 0.04           | Hallow 2014      | –           | –              | min <sup>-1</sup>   |
| 031 | $C_{adh\_norm}$    | Normal plasma level of antidiuretic hormone (vasopressin)                                                    | –                                                                                                                                           | 4.7            | –                | 1.0 – 13.3  | Yarmohammadi   | pg·ml <sup>-1</sup> |
| 032 | $C_{al\_norm}$     | Normal plasma concentration of aldosterone                                                                   | –                                                                                                                                           | 85             | Karaaslan 2005   | 70 – 300    | Fischbach      | pg·ml <sup>-1</sup> |
| 033 | $c_{ANGII\_ANGIV}$ | Rate of conversion of angiotensin II to angiotensin IV                                                       | –                                                                                                                                           | 0.3916666      | Hallow 2014      | –           | –              | min <sup>-1</sup>   |
| 034 | $C_{anp\_norm}$    | Normal plasma level of atrial natriuretic peptide (atriopeptin)                                              | –                                                                                                                                           | 36.0           | Karaaslan 2005   | 7.4 – 152.0 | Cannone Nozuki | ng·l <sup>-1</sup>  |
| 035 | $c_{AT1}$          | Rate of angiotensin II binding to AT1 receptors                                                              | –                                                                                                                                           | 0.1966666      | Hallow 2014      | –           | –              | min <sup>-1</sup>   |
| 036 | $C_{AT1\_aa}$      | Constant for AT1-bound angiotensin II effect on afferent arteriole resistance                                | –                                                                                                                                           | 0.1437 (0.185) | FP (Hallow 2014) | –           | –              | –                   |
| 037 | $C_{AT1\_ALVL}$    | Constant for AT1-bound angiotensin II effect on blood flow through systemic microvessels                     | –                                                                                                                                           | 0.2170         | FP               | –           | –              | –                   |
| 038 | $C_{AT1\_ea}$      | Constant for AT1-bound angiotensin II effect on efferent arteriole resistance                                | –                                                                                                                                           | 0.2441 (0.17)  | FP (Hallow 2014) | –           | –              | –                   |
| 039 | $C_{AT1\_preglom}$ | Constant for AT1-bound angiotensin II effect on resistance of interlobar, arcuate, and interlobular arteries | –                                                                                                                                           | 0.2133 (0.185) | FP (Hallow 2014) | –           | –              | –                   |
| 040 | $c_{AT2}$          | Rate of angiotensin II binding to AT2 receptors                                                              | –                                                                                                                                           | 0.065          | Hallow 2014      | –           | –              | min <sup>-1</sup>   |
| 041 | $c_{chym}$         | Rate of conversion of angiotensin I to angiotensin II by chymase                                             | –                                                                                                                                           | 0.01833333     | Hallow 2014      | –           | –              | min <sup>-1</sup>   |
| 042 | $C_H$              | Oxygen capacity of hemoglobin                                                                                | Carbon monoxide poisoning [S-D]                                                                                                             | 1.34           | S-D              | 1.32 – 1.39 | Dijkhuizen     | ml·g <sup>-1</sup>  |
| 043 | $C_K$              | Serum potassium concentration                                                                                | <u>Hypokalemia</u> : alkalemia, states of high endogenous or exogenous insulin or catecholamines, marked potassium deficiency (poor dietary | 4.5            | –                | 3.5 – 5.5   | Rastegar       | mEq·l <sup>-1</sup> |

|     |                   |                                                                        |                                                                                                                                                                                                                                                                                                           |                              |                     |                |             |                                    |
|-----|-------------------|------------------------------------------------------------------------|-----------------------------------------------------------------------------------------------------------------------------------------------------------------------------------------------------------------------------------------------------------------------------------------------------------|------------------------------|---------------------|----------------|-------------|------------------------------------|
|     |                   |                                                                        | intake, gastrointestinal disorders);<br><u>Hyperkalemia</u> : thrombocytosis, leukocytosis, significant hemolysis, acidemia, sudden increase in plasma osmolality, massive tissue breakdown, $\beta$ -blockade during and immediately after exercise, decrease in renal excretion of potassium [Rastegar] |                              |                     |                |             |                                    |
| 044 | $c_{nep}$         | Rate of conversion of angiotensin I to angiotensin-(1-7) by neprilysin | –                                                                                                                                                                                                                                                                                                         | 0.01833333                   | Hallow 2014         | –              | –           | $\text{min}^{-1}$                  |
| 045 | $d_{aa}$          | Afferent arteriole diameter                                            | –                                                                                                                                                                                                                                                                                                         | 23.1                         | –                   | $21.5 \pm 2.4$ | Neal        | $\mu\text{m}$                      |
| 046 | $d_{ea}$          | Efferent arteriole diameter                                            | –                                                                                                                                                                                                                                                                                                         | 16.9                         | FP                  | $15.9 \pm 2.4$ | Neal        | $\mu\text{m}$                      |
| 047 | $FS_{threshold}$  | Frank-Starling law action threshold                                    | –                                                                                                                                                                                                                                                                                                         | $m/70 \cdot FS_{threshold0}$ | Proshin MATLAB      | –              | –           | ml                                 |
| 048 | $FS_{threshold0}$ | Mean threshold of the Frank-Starling law action                        | –                                                                                                                                                                                                                                                                                                         | 20.0                         | Proshin MATLAB      | –              | –           | ml                                 |
| 049 | $G_{AL0}$         | Basic systemic arterial elastance                                      | Hypertension [Haluska]                                                                                                                                                                                                                                                                                    | 0.65                         | Proshin MATLAB      | $0.33 - 1.00$  | Table A4    | $\text{mmHg} \cdot \text{ml}^{-1}$ |
| 050 | $G_{AR0}$         | Basic pulmonary arterial elastance                                     | Pulmonary hypertension [Thenappan]                                                                                                                                                                                                                                                                        | 0.125                        | Proshin MATLAB      | $0.08 - 0.26$  | Table A4    | $\text{mmHg} \cdot \text{ml}^{-1}$ |
| 051 | $G_{HL}$          | LV wall elasticity                                                     | Hypertension [Safar, 1985], LV hypertrophy [S-D], exercise regularity [Bhella]                                                                                                                                                                                                                            | 0.0824 (0.16)                | FP (Zhang, 2008)    | $0.01 - 0.43$  | Zhang, 2008 | $\text{mmHg} \cdot \text{ml}^{-1}$ |
| 052 | $G_{HR}$          | RV wall elasticity                                                     | RV hypertrophy [S-D]                                                                                                                                                                                                                                                                                      | 0.0471 (0.16)                | FP (Zhang, 2008)    | $0.01 - 0.43$  | Zhang, 2008 | $\text{mmHg} \cdot \text{ml}^{-1}$ |
| 053 | $G_{VL0}$         | Basic elasticity of systemic veins                                     | Changing the elastic properties of systemic venous vessels [S-D]                                                                                                                                                                                                                                          | 0.0112 (0.0375)              | FP (Proshin MATLAB) | –              | –           | $\text{mmHg} \cdot \text{ml}^{-1}$ |
| 054 | $G_{VR0}$         | Basic elasticity of pulmonary veins                                    | Changing the elastic properties of pulmonary venous vessels [S-D]                                                                                                                                                                                                                                         | 0.0108 (0.0375)              | FP (Proshin MATLAB) | –              | –           | $\text{mmHg} \cdot \text{ml}^{-1}$ |
| 055 | <i>glucose</i>    | Plasma glucose concentration                                           | <u>Hyperglycemia</u> : diabetes mellitus, physiological increase in glucose (stress, exercise, smoking, etc.), endocrine pathology, pancreatic diseases (acute and chronic pancreatitis, pancreatic tumors, etc.), chronic liver and kidney diseases, cerebral hemorrhage,                                | 5.0                          | –                   | $3.9 - 6.1$    | Dedov       | $\text{mmol} \cdot \text{l}^{-1}$  |

|     |             |                                       |                                                                                                                                                                                                                                                                                                                                                                                                                                                          |      |             |                           |                |     |
|-----|-------------|---------------------------------------|----------------------------------------------------------------------------------------------------------------------------------------------------------------------------------------------------------------------------------------------------------------------------------------------------------------------------------------------------------------------------------------------------------------------------------------------------------|------|-------------|---------------------------|----------------|-----|
|     |             |                                       | myocardial infarction, presence of antibodies to insulin receptors; <u>Hypoglycemia</u> : pancreatic diseases, endocrine pathology, severe liver diseases (cirrhosis, hepatitis, carcinoma, etc.), malignant non-pancreatic tumors, fermentopathies, nutritional disorders (prolonged fasting, malabsorption syndrome), functional disorders (vegetative disorders, gastroenterostomy, etc.), intense physical activity, feverish states [Andrushkevich] |      |             |                           |                |     |
| 056 | $h_{ANG17}$ | Half-life of angiotensin (1-7)        | –                                                                                                                                                                                                                                                                                                                                                                                                                                                        | 30.0 | Hallow 2014 | 19.2–51.6 <sup>10</sup>   | Rodgers        | min |
| 057 | $h_{ANGI}$  | Half-life of angiotensin I            | –                                                                                                                                                                                                                                                                                                                                                                                                                                                        | 0.25 | –           | 0.25±0.08 <sup>11</sup>   | Admiraal       | min |
| 058 | $h_{ANGII}$ | Half-life of angiotensin II           | –                                                                                                                                                                                                                                                                                                                                                                                                                                                        | 0.9  | –           | M: 1.0<br>W: 0.8          | Magness Donato | min |
| 059 | $h_{ANGIV}$ | Half-life of angiotensin IV           | –                                                                                                                                                                                                                                                                                                                                                                                                                                                        | 0.5  | Hallow 2014 | –                         | –              | min |
| 060 | $h_{AT1}$   | Half-life of AT1-bound angiotensin II | –                                                                                                                                                                                                                                                                                                                                                                                                                                                        | 12.0 | Hallow 2014 | 12.0 <sup>12</sup>        | Inada          | min |
| 061 | $h_{AT2}$   | Half-life of AT2-bound angiotensin II | –                                                                                                                                                                                                                                                                                                                                                                                                                                                        | 12.0 | Hallow 2014 | –                         | –              | min |
| 062 | $h_{renin}$ | Half-life of circulating renin        | Malignant hypertension [Skrabal, 1974]                                                                                                                                                                                                                                                                                                                                                                                                                   | 12.0 | Hallow 2014 | 10.0 – 15.0 <sup>13</sup> | Skrabal 1974   | min |
| 063 | $Hct$       | Hematocrit                            | –                                                                                                                                                                                                                                                                                                                                                                                                                                                        | 40.0 | Guyton      | M: 40 – 54<br>W: 36 – 48  | Billett        | %   |

<sup>10</sup> *In vivo* measurement. The mean plasma half-life of angiotensin (1-7) administered before and after chemotherapy in patients with newly diagnosed breast cancer was 0.49 h (29 min), range 0.32 – 0.86 h (19.2 – 51.6 min) [Rodgers]. A similar range 0.42 – 0.61 h was obtained for higher doses of ANG17 administered in patients with advanced solid tumors refractory to standard therapy [Petty].

<sup>11</sup> *In vivo* measurement. The estimate obtained for six subjects with essential hypertension after the infusion of rather high quantities of unlabeled angiotensin I in combination with radiolabeled ANGI (<sup>125</sup>I-ANG I). High ANGI doses was given to minimize the contribution of endogenous ANGI to the plasma levels measured during the infusion [Admiraal].

<sup>12</sup> *In vitro* measurement. The value was obtained using bovine adrenal cortical membrane [Inada], and corresponds to the range 13 – 23 min obtained in [Glossmann] also for bovine adrenal cortex.

<sup>13</sup> *In vivo* measurement. Half-life of plasma renin activity in 3 normal subjects after maximal stimulation and subsequent inhibition of renin release by the intravenous administration of propranolol were 10, 13 and 15 minutes, and in the patient with malignant hypertension immediately after bilateral nephrectomy – 1 hour 22 minutes [Skrabal, 1974]. The values reported in the literature range from about 10 to 165 min, which can be explained, at least partly, by differences in the methods used for measuring renin [Derckx].

|     |                  |                                                                  |                                                                                                                                                                             |                            |                        |                         |         |                                                  |
|-----|------------------|------------------------------------------------------------------|-----------------------------------------------------------------------------------------------------------------------------------------------------------------------------|----------------------------|------------------------|-------------------------|---------|--------------------------------------------------|
| 064 | $He$             | Hemoglobin                                                       | Anemia [S-D]                                                                                                                                                                | 143.0                      | –                      | M:140–180<br>W:120–160  | Billett | $g \cdot l^{-1}$                                 |
| 065 | $Heart_{Base}$   | Basic activity of the cardiac center                             | –                                                                                                                                                                           | 0.1357 (0.5)               | FP (Proshin<br>MATLAB) | –                       | –       | –                                                |
| 066 | $Heart_{Baro}$   | Baroreceptor sensitivity of the cardiac center                   | Hyper- or hypoactivity of the vegetative nervous system, blockade of baroreceptors [S-D]                                                                                    | 0.6                        | Proshin<br>MATLAB      | –                       | –       | –                                                |
| 067 | $Heart_{Oxygen}$ | Weariness sensitivity of the cardiac center                      | Hyper- or hypoactivity of the vegetative nervous system, organism tolerance to the exercise stress under some functional disorders, such as neurocirculatory dystonia [S-D] | 1.75                       | Proshin<br>MATLAB      | –                       | –       | –                                                |
| 068 | $Heart_{Stress}$ | Stress sensitivity of the cardiac center                         | Hyper- or hypoactivity of the vegetative nervous system [S-D]                                                                                                               | 1.5                        | Proshin<br>MATLAB      | –                       | –       | –                                                |
| 069 | $Heart_{VO_2}$   | Respiratory sensitivity of the cardiac center                    | Hyper- or hypoactivity of the vegetative nervous system [S-D]                                                                                                               | 1.0                        | Proshin<br>MATLAB      | –                       | –       | –                                                |
| 070 | $k_{AL}$         | Fraction $\omega_{AL}$ of $V_{AL}$ at the initial moment of time | –                                                                                                                                                                           | 0.91 (0.87 <sup>14</sup> ) | FP (Proshin<br>MATLAB) | –                       | –       | –                                                |
| 071 | $k_{AR}$         | Fraction $\omega_{AR}$ of $V_{AR}$ at the initial moment of time | –                                                                                                                                                                           | 0.82 (0.8 <sup>14</sup> )  | FP (Proshin<br>MATLAB) | –                       | –       | –                                                |
| 072 | $K_{FG\_0}$      | Normal filtration coefficient                                    | –                                                                                                                                                                           | 0.005202                   | Škrtić                 | 0.0039–<br>0.0162       | Hoang   | $l \cdot \text{min}^{-1} \cdot \text{mmHg}^{-1}$ |
| 073 | $k_{HL}$         | Fraction $\omega_{HL}$ of $V_{HL}$ at the initial moment of time | –                                                                                                                                                                           | 0.0                        | Rosalina<br>Paeme      | 0.0 – 0.3 <sup>15</sup> | –       | –                                                |
| 074 | $K_{HLAL}$       | Aortic valve regurgitation coefficient                           | Aortic valve failure [S-D]                                                                                                                                                  | 0.0                        | S-D                    | 0.0                     | S-D     | –                                                |
| 075 | $k_{HR}$         | Fraction $\omega_{HR}$ of $V_{HR}$ at the initial moment of time | –                                                                                                                                                                           | 0.0                        | Paeme                  | 0.0 – 0.3 <sup>15</sup> | –       | –                                                |
| 076 | $K_{HRAR}$       | Pulmonary valve regurgitation coefficient                        | Pulmonary valve failure [S-D]                                                                                                                                               | 0.0                        | S-D                    | 0.0                     | S-D     | –                                                |

<sup>14</sup> The model implementation by Proshin and Solodyannikov in MATLAB provides the initial volumes  $V_{AL0} = 300$  ml,  $V_{AR0} = 300$  ml,  $V_{VR0} = 1135$  ml,  $V_{HL0} = 140$  ml, and  $V_{HR0} = 140$  ml, the body weight  $m = 70.86$ , and the formula for the allometric scaling  $mass_{volume}$ , according to which the body weight of 70 kg corresponds to the normal circulating blood volume of 4725 ml. Based on this, we found the value  $V = 70.86 \cdot 4725 / 70 \approx 4783$  ml and received  $V_{V0} = V - V_{AL0} - V_{AR0} - V_{VR0} - V_{HL0} - V_{HR0} \approx 2768$  ml. Taking into account the normal values of the unstressed volumes  $\omega_{AL0} = 260$  ml,  $\omega_{AR0} = 240$  ml,  $\omega_{HL0} = 40$  ml,  $\omega_{HR0} = 40$  ml,  $\omega_{VL0} = 2650$  ml, and  $\omega_{VR0} = 1075$  ml, we calculated the corresponding fractions  $k_{AL} \approx 0.87$ ,  $k_{AR} = 0.8$ ,  $k_{HL} \approx 0.3$ ,  $k_{HR} \approx 0.3$ ,  $k_{VL} \approx 0.96$  and  $k_{VR} = 0.95$ .

<sup>15</sup> The rationale for this range is given in Table A4 below in description of the parameters  $\omega_{HL}$  and  $\omega_{HR}$ .

|     |                                                                               |                                                                                         |                                                                                                                       |                            |                     |                                              |            |               |
|-----|-------------------------------------------------------------------------------|-----------------------------------------------------------------------------------------|-----------------------------------------------------------------------------------------------------------------------|----------------------------|---------------------|----------------------------------------------|------------|---------------|
| 077 | $k_{VL}$                                                                      | Fraction $\omega_{VL}$ of $V_{VL}$ at the initial moment of time                        | –                                                                                                                     | 1.0 (0.96 <sup>14</sup> )  | FP (Proshin MATLAB) | –                                            | –          | –             |
| 078 | $K_{VLHR}$                                                                    | Tricuspid valve regurgitation coefficient                                               | Tricuspid valve failure [S-D]                                                                                         | 0.0                        | S-D                 | 0.0                                          | S-D        | –             |
| 079 | $k_{VR}$                                                                      | Fraction $\omega_{VR}$ of $V_{VR}$ at the initial moment of time                        | –                                                                                                                     | 0.97 (0.95 <sup>14</sup> ) | FP (Proshin MATLAB) | –                                            | –          | –             |
| 080 | $K_{VRHL}$                                                                    | Mitral valve regurgitation coefficient                                                  | Mitral valve failure [S-D]                                                                                            | 0.0                        | S-D                 | 0.0                                          | S-D        | –             |
| 081 | $K_{L0}$                                                                      | Inotropic status of the LV                                                              | Decreased pumping function of the heart (myocardial infarction, heart failure of different pathogenesis, etc.) [S-D]. | 0.55                       | S-D                 | 0.55 – 0.60                                  | S-D        | –             |
| 082 | $K_{R0}$                                                                      | Inotropic status of the RV                                                              | Similar to $K_{L0}$ [S-D].                                                                                            | 0.55                       | S-D                 | 0.55 – 0.60                                  | S-D        | –             |
| 083 | $L_{aa}$                                                                      | Afferent arteriole length                                                               | –                                                                                                                     | 112.0                      | Neal                | –                                            | –          | $\mu\text{m}$ |
| 084 | $L_{ea}$                                                                      | Efferent arteriole length                                                               | –                                                                                                                     | 138.0                      | Neal                | –                                            | –          | $\mu\text{m}$ |
| 085 | $m$                                                                           | Body weight                                                                             | –                                                                                                                     | 70                         | –                   | –                                            | –          | kg            |
| 086 | $N_{nephrons}$                                                                | Number of nephrons in the kidneys                                                       | Renal pathology, hypertension, birth weight, age [Bertram]                                                            | 2.75E6 (2.0E6)             | FP (Hallow 2014)    | 2 x 0.2E6 – 2 x 2.7E6 <sup>16</sup>          | Bertram    | –             |
| 087 | $N_{rsna}$                                                                    | Normalized renal sympathetic nerve activity                                             | –                                                                                                                     | 1.0                        | Karaaslan 2005      | –                                            | –          | –             |
| 088 | $n_{\varepsilon\_dt}$                                                         | Normal fractional distal sodium reabsorption                                            | –                                                                                                                     | 0.50                       | Karaaslan 2005      | –                                            | –          | –             |
| 089 | $n_{\eta\_cd}$                                                                | Normal fractional collecting duct sodium reabsorption                                   | –                                                                                                                     | 0.90 (0.93)                | FP (Karaaslan 2005) | –                                            | –          | –             |
| 090 | $n_{\eta\_pt}$                                                                | Normal fractional sodium reabsorption in the proximal tubule and the loop of Henle      | –                                                                                                                     | 0.80                       | Karaaslan 2005      | M: 0.795 $\pm$ 0.083<br>W: 0.793 $\pm$ 0.084 | Seidlerová | –             |
| 091 | $n_{\varepsilon\_dt} + n_{\eta\_cd} - n_{\eta\_cd} \cdot n_{\varepsilon\_dt}$ | Normal fractional sodium reabsorption in the distal tubule and subsequent nephron parts | –                                                                                                                     | 0.95                       | Karaaslan 2005      | M: 0.946 $\pm$ 0.032<br>W: 0.950 $\pm$ 0.031 | Seidlerová | –             |
| 092 | $P_0$                                                                         | Baroreceptor sensitivity threshold                                                      | Hyperfunction of the circulatory system, baroreceptor blockade [S-D]                                                  | 2.0                        | Proshin MATLAB      | –                                            | –          | mmHg          |

<sup>16</sup> The article [Bertram] gives a range of 0.2E6 – 2.7E6 for the nephron number in one human kidney with an average value of 895711.  $N_{nephrons}$  is the number of nephrons in two kidneys.



|     |                    |                                                                                                          |                                                                                                 |                        |                   |             |               |                          |
|-----|--------------------|----------------------------------------------------------------------------------------------------------|-------------------------------------------------------------------------------------------------|------------------------|-------------------|-------------|---------------|--------------------------|
| 093 | $P_B$              | Hydrostatic pressure in the Bowman's space                                                               | –                                                                                               | 10.0                   | Gómez             | 10.0 – 15.0 | Digne-Malcolm | mmHg                     |
| 094 | $P_{gh\_norm}$     | Normal glomerular hydrostatic pressure                                                                   | –                                                                                               | 60.0                   | Hallow 2014       | 48.0 – 63.0 | Guberina      | mmHg                     |
| 095 | $P_v$              | Renal venous pressure                                                                                    | Hypertension (with hydropenia or during sustained isotonic saline volume expansion) [Willassen] | 6.0                    | Digne-Malcolm     | –           | –             | mmHg                     |
| 096 | $PRC_{nom}$        | Nominal value of plasma renin concentration                                                              | –                                                                                               | 20.0 (15.0)            | FP (Hallow 2014)  | 3.42 – 69.4 | Perschel      | pg·ml <sup>-1</sup>      |
| 097 | $R_{preglom\_0}$   | Nominal resistance of interlobar, arcuate and interlobular arteries                                      | –                                                                                               | 10.0 (14.0)            | FP (Hallow 2017a) | 10.0 – 20.0 | Hallow 2017a  | mmHg·min·l <sup>-1</sup> |
| 098 | $R_v$              | Renal venous resistance                                                                                  | –                                                                                               | 15.0                   | App. B            | 11.3 – 20.1 | App. B        | mmHg·min·l <sup>-1</sup> |
| 099 | $RO_2$             | Oxygen demand                                                                                            | Exercise stress [S-D]                                                                           | $m/70 \cdot RO_{20}$   | Proshin MATLAB    | –           | –             | ml·s <sup>-1</sup>       |
| 100 | $RO_{20}$          | Mean body oxygen demand                                                                                  | Exercise stress [S-D]                                                                           | 4.2                    | –                 | ≈ 4.2       | Treacher      | ml·s <sup>-1</sup>       |
| 101 | $sl_{baro}$        | Slope of the linear function of AT1-bound angiotensin II effect on baroreceptor activity                 | –                                                                                               | 0.3457                 | FP                | –           | –             | –                        |
| 102 | $sl_{KFG}$         | Slope of the linear function of AT1-bound angiotensin II effect on filtration coefficient                | –                                                                                               | 0.0924                 | FP                | –           | –             | –                        |
| 103 | $sl_{pgh}$         | Slope of the linear function of glomerular hydrostatic pressure effect on myogenic autoregulation signal | –                                                                                               | 0.8294                 | FP                | –           | –             | –                        |
| 104 | $sl_{stress}$      | Slope of the linear function of AT1-bound angiotensin II effect on stress receptor activity              | –                                                                                               | 0.1349                 | FP                | –           | –             | –                        |
| 105 | $slope_{AT1\_PRC}$ | Constant for AT1-bound angiotensin II effect on renin secretion rate                                     | –                                                                                               | 1.2                    | Hallow 2017a      | –           | –             | –                        |
| 106 | $SpO_2$            | Arterial oxygen saturation                                                                               | –                                                                                               | 0.98                   | –                 | 0.95 – 0.99 | Goldberg      | –                        |
| 107 | $st$               | Stress factor, the level of steroid hormones in the blood                                                | Stress mode [S-D]                                                                               | 0.25                   | Proshin MATLAB    | 0.0 – 1.0   | S-D           | –                        |
| 108 | $SV_{max}$         | Theoretical maximum stroke volume                                                                        | –                                                                                               | $m/70 \cdot SV_{max0}$ | Proshin MATLAB    | –           | –             | ml                       |
| 109 | $SV_{max0}$        | Average theoretical maximum stroke volume                                                                | –                                                                                               | 200.0                  | Proshin MATLAB    | –           | –             | ml                       |
| 110 | $T_{al}$           | Time constant for aldosterone secretion                                                                  | –                                                                                               | 30.0                   | Karaaslan 2005    | –           | –             | min                      |

|     |             |                           |                                                                                                                                                                                                                                                                                                                                                                                                                                                                                                                                                                                                                      |                                                                                                                        |      |                            |                   |                                 |
|-----|-------------|---------------------------|----------------------------------------------------------------------------------------------------------------------------------------------------------------------------------------------------------------------------------------------------------------------------------------------------------------------------------------------------------------------------------------------------------------------------------------------------------------------------------------------------------------------------------------------------------------------------------------------------------------------|------------------------------------------------------------------------------------------------------------------------|------|----------------------------|-------------------|---------------------------------|
| 111 | <i>TP</i>   | Total protein             | <p><u>Albumin</u>: increase – acute dehydration; decrease – end-stage liver disease, intestinal malabsorption syndromes, protein-calorie malnutrition, nephrotic syndrome, severe burns.</p> <p><u>Globulin</u>: increase – stress, acute inflammation, tissue necrosis, chronic infections, nephrotic syndrome, severe iron deficiency, connective tissue diseases, liver disease, multiple myeloma, lymphoma, etc.; decrease – congenital <math>\alpha_1</math> antitrypsin deficiency, hemolytic reaction, congenital immune deficiency syndromes, chronic lymphocytic leukemia, nephrotic syndrome [Busher].</p> | 70.0                                                                                                                   | –    | 60.0 – 80.0<br>66.0 – 86.0 | Busher<br>Gardner | $\text{g}\cdot\text{l}^{-1}$    |
| 112 | <i>urea</i> | Plasma urea concentration | Renal (glomerulonephritis, renal amyloidosis, pyelonephritis, etc.) and extrarenal (heart failure, severe bleeding, shock, etc.) retention azotemia, production azotemia (cachexia, leukemia, increased physical activity, etc.), liver dysfunction, pregnancy, low protein diet, phosphorus poisoning, acromegaly, malabsorption syndrome [Andrushkevich]                                                                                                                                                                                                                                                           | 5.0                                                                                                                    | –    | 1.8 – 7.1                  | Hosten            | $\text{mmol}\cdot\text{l}^{-1}$ |
| 113 | <i>Vis</i>  | Blood viscosity           | Heat stress [Keatinge], hypertension [Letcher]                                                                                                                                                                                                                                                                                                                                                                                                                                                                                                                                                                       | $1.23 \cdot \left(1 - \frac{Hct}{99}\right)^{-n}$ $n = a + b \cdot e^{-c \cdot Hct}$ $a = 1.7, b = 9.86,$ $c = 0.0607$ | Hund | $4.66 \pm 0.72^{17}$       | Furukawa          | sP                              |

<sup>17</sup> Values for a shear rate of  $100 \text{ s}^{-1}$ . Experimental data [Brooks] used to derive the viscosity formula in [Hund] correspond to shear rates above  $100 \text{ s}^{-1}$ , when the viscosity is practically unchanged. Typical ranges of shear rates:  $20\text{--}200 \text{ s}^{-1}$  for veins,  $300\text{--}800 \text{ s}^{-1}$  for large arteries,  $500\text{--}1600 \text{ s}^{-1}$  for arterioles [Kroll].

|     |                     |                                                                                    |                                     |                                         |                     |                               |          |                                          |
|-----|---------------------|------------------------------------------------------------------------------------|-------------------------------------|-----------------------------------------|---------------------|-------------------------------|----------|------------------------------------------|
| 114 | $Vis_{norm}$        | Mean normal blood viscosity                                                        | –                                   | 4.65 <sup>18</sup>                      | Hund                | 4.66 ± 0.72                   | Furukawa | sP                                       |
| 115 | $X_{PRC\_PRA}$      | Equilibrium ratio of plasma renin activity to plasma renin concentration           | –                                   | 1.016666                                | Hallow 2014         | –                             | –        | fmol·min <sup>-1</sup> ·pg <sup>-1</sup> |
| 116 | $Y_{ALVLO}$         | Basic conductivity of systemic microvessels (arterioles, capillaries and venules)  | Peripheral vascular spasm [S-D]     | 1.363 (1.2)                             | FP (Proshin MATLAB) | –                             | –        | ml·s <sup>-1</sup> ·mmHg <sup>-1</sup>   |
| 117 | $Y_{ARVRO}$         | Basic conductivity of pulmonary microvessels (arterioles, capillaries and venules) | Pulmonary vasospasm [S-D]           | 15.0 (4.8)                              | FP (Proshin MATLAB) | –                             | –        | ml·s <sup>-1</sup> ·mmHg <sup>-1</sup>   |
| 118 | $Y_{HLAL}$          | Basic conductivity of the aortic valve and systemic arteries                       | Aortic stenosis [S-D]               | 7.0 (13.515)                            | FP (Proshin MATLAB) | –                             | –        | ml·s <sup>-1</sup> ·mmHg <sup>-1</sup>   |
| 119 | $Y_{HRAR}$          | Basic conductivity of the pulmonary valve and arteries                             | Pulmonary valve stenosis [S-D]      | 57.0 (15.225)                           | FP (Proshin MATLAB) | –                             | –        | ml·s <sup>-1</sup> ·mmHg <sup>-1</sup>   |
| 120 | $Y_{VLHRO}$         | Basic conductivity of the tricuspid valve and systemic veins                       | Tricuspid valve stenosis [S-D]      | 90.0 (120.0)                            | FP (Proshin MATLAB) | –                             | –        | ml·s <sup>-1</sup> ·mmHg <sup>-1</sup>   |
| 121 | $Y_{VRHLO}$         | Basic conductivity of the mitral valve and pulmonary veins                         | Mitral stenosis [S-D]               | 57.0 (40.0)                             | FP (Proshin MATLAB) | –                             | –        | ml·s <sup>-1</sup> ·mmHg <sup>-1</sup>   |
| 122 | $\xi_{map}$         | Effect of mean arterial pressure on the aldosterone secretion                      | –                                   | 1.0                                     | Karaaslan 2005      | –                             | –        | –                                        |
| 123 | $\tau_{MD\_renin}$  | Constant for macula densa sodium flow effect on renin secretion rate               | –                                   | 0.0959 (2.0)                            | FP (Hallow 2017a)   | –                             | –        | –                                        |
| 124 | $\Phi_{md\_sod\_0}$ | Nominal value of macula densa sodium flow rate                                     | –                                   | 3.320 (0.7980)                          | FP (Hallow 2017a)   | –                             | –        | mEq·min <sup>-1</sup>                    |
| 125 | $\Phi_{sodin}$      | Sodium intake                                                                      | –                                   | 0.0565 (0.1260)                         | FP (Karaaslan 2005) | 0.035 – 0.174                 | Luft     | mEq·min <sup>-1</sup>                    |
| 126 | $\Phi_{win\_norm}$  | Normal value of water intake                                                       | –                                   | 0.0019                                  | –                   | 0.0019 ± 0.0007 <sup>19</sup> | Malisova | l·min <sup>-1</sup>                      |
| 127 | $\omega_{AL\_nom}$  | Nominal unstressed volume of systemic arteries                                     | Vasospasm (vascular collapse) [S-D] | $k_{AL} \cdot V_{AL}(0) \approx 573.82$ | –                   | –                             | –        | ml                                       |
| 128 | $\omega_{AR\_nom}$  | Nominal unstressed volume of pulmonary arteries                                    | Pulmonary vasospasm [S-D]           | $k_{AR} \cdot V_{AR}(0) \approx 139.21$ | –                   | –                             | –        | ml                                       |

<sup>18</sup> The value given by the viscosity formula proposed by Hund et al. [Hund] for hematocrit of 40%.

<sup>19</sup> 2.75 ± 1.01 l/day

|     |               |                                      |                                                                               |                                          |   |                   |   |    |
|-----|---------------|--------------------------------------|-------------------------------------------------------------------------------|------------------------------------------|---|-------------------|---|----|
| 129 | $\omega_{HL}$ | Unstressed LV volume <sup>20</sup>   | LV hypertrophy [S-D], heart disease [Senzaki], hypertension [Kelly], [Kass]   | $k_{HL} \cdot V_{HL}(0) = 0.0$           | – | $0.0 - 42.0^{20}$ | – | ml |
| 130 | $\omega_{HR}$ | Unstressed RV volume <sup>20</sup>   | RV hypertrophy [S-D], pulmonary hypertension [Trip]                           | $k_{HR} \cdot V_{HR}(0) = 0.0$           | – | $0.0 - 42.0^{20}$ | – | ml |
| 131 | $\omega_{VL}$ | Unstressed volume of systemic veins  | Congestion in the veins: varicose veins, congestive heart failure, etc. [S-D] | $k_{VL} \cdot V_{VL}(0) \approx 3443.90$ | – | –                 | – | ml |
| 132 | $\omega_{VR}$ | Unstressed volume of pulmonary veins | Congestion in the pulmonary veins: pulmonary edema, RV failure, etc. [S-D]    | $k_{VR} \cdot V_{VR}(0) \approx 305.83$  | – | –                 | – | ml |

<sup>20</sup> The variable  $\omega_{HL}$  (or  $\omega_{HR}$ ) corresponds to the LV (RV) volume  $V_{HL}$  ( $V_{HR}$ ) at zero diastolic pressure  $P_{HL\_D}$  ( $P_{HR\_D}$ ), and defines a volume-axis intercept of the end-diastolic pressure-volume relation (EDPVR) curve [Paeme]. Theoretically, for a healthy heart, the corresponding end-systolic pressure-volume relation (ESPVR) curve has the same volume intercept ( $V_0$ ) [Bastos], [Paeme]. Therefore, to assign the reference ranges for  $\omega_{HL}$  and  $\omega_{HR}$ , we used the estimates found in the literature for the linear (unless otherwise stated below) ESPVR curves. Figure 6 of the article [Kelly] shows that the LV value  $V_0$  in a young normotensive is approximately  $-5.0$  to  $0.0$  ml, which is consistent with the value  $\omega_{HL} = 0.0$  in the [Rosalina] and [Paeme] models. In [Hayward], for 11 subjects with normal LV function, the values  $V_0$  are negative:  $-32.5 \pm 3.2$  ml. The work [Kass] gives estimate  $-32.5 \pm 18.6$  ml of the LV value  $V_0$  for 6 patients with normal coronary arteriography and ventriculography, which taking into account the normalization to LV end-diastolic volumes presented for all patients results in the range  $-0.82$  to  $0.0$  for  $k_{HL}$ . The author of the article [Shoucri, 2013] considered the non-linear ESPVR curve and found the LV values  $16.62 - 51.37$  ml of  $V_0$  ( $0.15 - 0.28$  for  $k_{HL}$ ) in 10 normal patients. A similar estimate for 9 normal subjects is in another work by the same author:  $33.8 - 61.1$  ml ( $0.19 - 0.28$  for  $k_{HL}$ ) [Shoucri, 2015]. The article [Dell'Italia] provides an estimate  $24 - 89$  ml of the RV values  $V_0$  ( $0.20 - 0.43$  for  $k_{HR}$ ) in 9 patients with normal coronary anatomy and ventricular function. In work [Brown, 1988], for 8 patients with normal RV function, the values  $V_0$  were  $-8$  to  $28$  ml/m<sup>2</sup> ( $-0.12$  to  $0.40$  for  $k_{HR}$ ). Note that in patients with heart disease, the ranges of  $V_0$  for the LV and the RV can vary significantly. So in the work [Senzaki], an estimate of  $V_0$  for the LV in 87 patients with normal or myopathic hearts is  $-100$  to  $200$  ml, and in the article [Trip], for patients with pulmonary hypertension, the range  $-8$  to  $171$  ml is given for the RV values  $V_0$ . Based on the above, in the current work, we considered the normal range  $0.0 - 0.3$  for  $k_{HL}$  and  $k_{HR}$ , which taking into account the normal initial volumes  $V_{HL} = V_{HR} = 140$  ml gives  $0.0 - 42.0$  ml for  $\omega_{HL}$  and  $\omega_{HR}$ .

**Table A4.** List of the model variables.

| №   | Variables              | Entity                                                     | Pathological conditions and factors affecting the value                                                                                                                                                                                                                                                          | Values                    |                                                      |                           | Units                 |
|-----|------------------------|------------------------------------------------------------|------------------------------------------------------------------------------------------------------------------------------------------------------------------------------------------------------------------------------------------------------------------------------------------------------------------|---------------------------|------------------------------------------------------|---------------------------|-----------------------|
|     |                        |                                                            |                                                                                                                                                                                                                                                                                                                  | Equilibrium <sup>21</sup> | Initial (to generate virtual patients) <sup>22</sup> | Norms <sup>23</sup>       |                       |
| 001 | <i>ANG17</i>           | Plasma angiotensin-(1-7) concentration                     | Hypertension, pre-eclampsia, hypertrophic myocardial disease, congestive heart failure, myocardial infarct, chronic renal diseases, hepatic cirrhosis, diabetic nephropathy, gestational diabetes [Ribeiro-Oliveira]                                                                                             | 14.1233                   | 23.0                                                 | 22.9 ± 8.8 [Ferrario]     | fmol·ml <sup>-1</sup> |
| 002 | <i>ANGI</i>            | Plasma angiotensin I concentration                         | Hymenoptera venom anaphylaxis [Hermann]                                                                                                                                                                                                                                                                          | 7.5052                    | 7.5 [Hallow, 2017a]                                  | 8.2 ± 5.4 [Nussberger]    | fmol·ml <sup>-1</sup> |
| 003 | <i>ANGII</i>           | Plasma angiotensin II concentration                        | Type 1 diabetes [Bojestig], aldosterone level [Wang], hymenoptera venom anaphylaxis [Hermann]                                                                                                                                                                                                                    | 4.7180                    | 4.75 [Hallow, 2017a]                                 | 5.2 ± 1.9 [Nussberger]    | fmol·ml <sup>-1</sup> |
| 004 | <i>ANGIV</i>           | Plasma angiotensin IV concentration                        | –                                                                                                                                                                                                                                                                                                                | 1.3330                    | 0.0                                                  | –                         | fmol·ml <sup>-1</sup> |
| 005 | <i>AT1_ANGII</i>       | Concentration of AT1-bound angiotensin II                  | –                                                                                                                                                                                                                                                                                                                | 16.0637                   | 16.63 [Hallow, 2017a]                                | –                         | fmol·ml <sup>-1</sup> |
| 006 | <i>AT2_ANGII</i>       | Concentration of AT2-bound angiotensin II                  | –                                                                                                                                                                                                                                                                                                                | 5.3092                    | 4.16 [Hallow, 2017a]                                 | –                         | fmol·ml <sup>-1</sup> |
| 007 | <i>C<sub>adh</sub></i> | Plasma concentration of antidiuretic hormone (vasopressin) | Hypertension [Cowley], change in blood osmolality [Hammer]                                                                                                                                                                                                                                                       | 3.2746                    | –                                                    | 1.0 – 13.3 [Yarmohammadi] | pg·ml <sup>-1</sup>   |
| 008 | <i>C<sub>al</sub></i>  | Plasma aldosterone concentration                           | Salt intake [Ishimitsu], [Wambach], hypertension, concentric LV hypertrophy, atrial fibrillation, obesity, chronic kidney disease, high triglycerides, metabolic syndrome [Buglioni], ascites in hepatic cirrhosis [Kuiper], primary and secondary aldosteronism [Glinicki], type 1 diabetes [Škrčić], race [Tu] | 108.2091                  | –                                                    | 70 – 300 [Fischbach]      | pg·ml <sup>-1</sup>   |

<sup>21</sup> Equilibrium values of the model within the normal ranges for a healthy person (an accuracy of 10<sup>-4</sup>, the exact values can be found in the BioUML implementation of the model in the website: <https://gitlab.sirius-web.org/virtual-patient/blood-pressure-regulation>).

<sup>22</sup> The initial values of variables calculated using differential equations or discrete events. They can be used for generation of virtual patients.

<sup>23</sup> Data range or mean ± SD.

|     |                  |                                                                     |                                                                                                                                                                                                                                                                         |          |                          |                                                 |                                |
|-----|------------------|---------------------------------------------------------------------|-------------------------------------------------------------------------------------------------------------------------------------------------------------------------------------------------------------------------------------------------------------------------|----------|--------------------------|-------------------------------------------------|--------------------------------|
| 009 | $C_{amp}$        | Plasma concentration of atrial natriuretic peptide (atriopeptin)    | Type 1 diabetes [Bojestig], salt intake, hypertension [Ishimitsu], [Wambach], congestive heart failure, chronic renal failure [Nozuki], plasma aldosterone level in hypertension [Cannone], ventricular pacing [Zullo]                                                  | 43.7338  | –                        | 7.4 – 152.0<br>[Cannone]<br>[Nozuki]            | $\text{ng}\cdot\text{l}^{-1}$  |
| 010 | $C_M$            | Plasma protein mean concentration within the glomerular capillaries | –                                                                                                                                                                                                                                                                       | 7.6064   | –                        | –                                               | $\text{g}\cdot\text{l}^{-1}$   |
| 011 | $C_{sod}$        | Serum sodium concentration                                          | Hypovolaemia (burns, diarrhoea, vomiting, acute and chronic renal disease, etc.), hypervolaemia (congestive cardiac failure, cirrhosis with ascites, chronic renal failure, etc.), euvolaemia (hypothyroidism, water intoxication, diabetes insipidus, etc.) [Reynolds] | 143.1384 | –                        | 137 – 147<br>[Payne]                            | $\text{mEq}\cdot\text{l}^{-1}$ |
| 012 | $CO$             | Cardiac output                                                      | Hypertension, exercise [Cl  roux], positive-pressure ventilation [Kyhl]                                                                                                                                                                                                 | 4.9503   | –                        | 2.51 – 9.00<br>(age 18+)<br>[Cattermole]        | $\text{l}\cdot\text{min}^{-1}$ |
| 013 | $Cycle_{Length}$ | Cardiac cycle length (RR-interval)                                  | –                                                                                                                                                                                                                                                                       | 0.7578   | 0.85 [Proshin<br>MATLAB] | M: 0.624 – 1.284<br>F: 0.600 – 1.213<br>[Mason] | s                              |
| 014 | $Cycle_{Time}$   | Time of the current cardiac cycle                                   | –                                                                                                                                                                                                                                                                       | 0.5673   | 0.0                      | –                                               | s                              |
| 015 | $DO_2$           | Oxygen debt                                                         | –                                                                                                                                                                                                                                                                       | 10.8205  | 0.0 [Proshin<br>MATLAB]  | –                                               | ml                             |
| 016 | $DTS_L$          | LV systolic mismatch                                                | –                                                                                                                                                                                                                                                                       | 0.0      | –                        | –                                               | –                              |
| 017 | $DTS_R$          | RV systolic mismatch                                                | –                                                                                                                                                                                                                                                                       | 0.0      | –                        | –                                               | –                              |
| 018 | $EF$             | Ejection fraction                                                   | Cardiomyopathy, coronary artery disease [Pagani], chronic heart failure [Dushina]                                                                                                                                                                                       | 62.2167  | –                        | $\geq 50$<br>[Pfisterer]                        | %                              |
| 019 | $F_{ALVL}$       | Blood flow through systemic microvessels                            | –                                                                                                                                                                                                                                                                       | 76.3198  | –                        | –                                               | $\text{ml}\cdot\text{s}^{-1}$  |
| 020 | $F_{ARVR}$       | Blood flow through pulmonary microvessels                           | –                                                                                                                                                                                                                                                                       | 58.4373  | –                        | –                                               | $\text{ml}\cdot\text{s}^{-1}$  |

|     |                |                                                      |                                                                                                                                                                                 |          |   |                                                       |                    |
|-----|----------------|------------------------------------------------------|---------------------------------------------------------------------------------------------------------------------------------------------------------------------------------|----------|---|-------------------------------------------------------|--------------------|
| 021 | $F_{HLAL}$     | Blood flow through the aortic valve                  | Exercise in healthy individuals and patients with aortic valve substitutes [Blais] as well as aortic stenosis [Burwash], [Otto], severe aortic stenosis [Johnson]               | 0.0      | – | Mean flow rate <sup>24</sup> :<br>269 ± 53<br>[Blais] | ml·s <sup>-1</sup> |
| 022 | $F_{HLAL\_p}$  | Peak flow rate $F_{HLAL}$                            | Exercise in patients with aortic stenosis [Otto]                                                                                                                                | 405.5433 | – | 512 ± 165<br>[Kyhl]                                   | ml·s <sup>-1</sup> |
| 023 | $F_{HRAR}$     | Blood flow through the pulmonary valve               | Exercise [Wright, 2018]                                                                                                                                                         | 0.0      | – | Mean flow rate:<br>320 ± 117<br>[Wright, 2018]        | ml·s <sup>-1</sup> |
| 024 | $F_{HRAR\_p}$  | Peak flow rate $F_{HRAR}$                            | –                                                                                                                                                                               | 514.0842 | – | 611 ± 182<br>[Kyhl]                                   | ml·s <sup>-1</sup> |
| 025 | $F_{VLHR}$     | Blood flow through the tricuspid valve <sup>25</sup> | Age, gender [Maceira, 2006b], positive-pressure ventilation [Kyhl]                                                                                                              | 50.1525  | – | –                                                     | ml·s <sup>-1</sup> |
| 026 | $F_{VLHR\_ap}$ | Active peak $F_{VLHR}$ <sup>25</sup>                 | Similar to $F_{VLHR}$                                                                                                                                                           | 358.6257 | – | 29 – 770 <sup>26</sup><br>[Maceira, 2006b]            | ml·s <sup>-1</sup> |
| 027 | $F_{VLHR\_ep}$ | Early peak $F_{VLHR}$ <sup>25</sup>                  | Similar to $F_{VLHR}$                                                                                                                                                           | 494.3659 | – | 105 – 753 <sup>26</sup><br>[Maceira, 2006b]           | ml·s <sup>-1</sup> |
| 028 | $F_{VRHL}$     | Blood flow through the mitral valve <sup>27</sup>    | Age, gender [Maceira, 2006a], hypobaric hypoxia [Holloway], positive-pressure ventilation [Kyhl]                                                                                | 34.9546  | – | –                                                     | ml·s <sup>-1</sup> |
| 029 | $F_{VRHL\_ap}$ | Active peak $F_{VRHL}$ <sup>27</sup>                 | Similar to $F_{VRHL}$                                                                                                                                                           | 286.8198 | – | 77 – 497 <sup>26</sup><br>[Maceira, 2006a]            | ml·s <sup>-1</sup> |
| 030 | $F_{VRHL\_ep}$ | Early peak $F_{VRHL}$ <sup>27</sup>                  | Similar to $F_{VRHL}$                                                                                                                                                           | 673.2094 | – | 178 – 1000 <sup>26</sup><br>[Maceira, 2006a]          | ml·s <sup>-1</sup> |
| 031 | $FF$           | Filtration fraction                                  | Cardiac dysfunction, secondary to pulmonary hypertension [Damman], early postpartum period [Lafayette], age with hypertension [Bauer], hydropenia with hypertension [Willassen] | 0.1551   | – | 0.19 ± 0.04<br>[Škrtić]                               | –                  |

<sup>24</sup> Mean transvalvular flow rate is the quotient of stroke volume and systolic ejection time [Blais].

<sup>25</sup> The rate of the RV filling through the tricuspid valve is characterized by the early peak after the valve opening at early diastole and the active peak at the moment of the right atrial contraction. These peaks can be estimated from the time derivative of the RV volume by cardiovascular magnetic resonance [Maceira, 2006b].

<sup>26</sup> Men and women aged 20 to 59 years.

<sup>27</sup> The rate of the LV filling through the mitral valve in diastole is characterized by two peaks [Caudron], [Boogers], [Zhang, 2019], which can be estimated from the time derivative of the LV volume by cardiovascular magnetic resonance [Maceira, 2006a]. In normal subjects, the LV inflow is greatest immediately after opening of the mitral valve (early peak), the left atrial contraction is responsible for smaller inflow (active peak) [Caudron].

|     |                |                              |                                                                                                                                                                                                                                                                                                                             |         |                          |                                             |                         |
|-----|----------------|------------------------------|-----------------------------------------------------------------------------------------------------------------------------------------------------------------------------------------------------------------------------------------------------------------------------------------------------------------------------|---------|--------------------------|---------------------------------------------|-------------------------|
| 032 | $G_{AL}$       | Systemic arterial elastance  | Aortic valve stenosis [Laskey, 2009], congestive heart failure secondary to idiopathic dilated cardiomyopathy [Laskey, 1990], diabetes mellitus, hypertension [Haluska], idiopathic dilated cardiomyopathy, coronary artery disease, hypertrophic cardiomyopathy, RV disease [Chemla, 1998], age $\geq 65$ years [Fujimoto] | 0.9186  | –                        | 0.33 – 1.00 <sup>28</sup><br>[Laskey, 1990] | mmHg·ml <sup>-1</sup>   |
| 033 | $G_{AR}$       | Pulmonary arterial elastance | Pulmonary hypertension [Thenappan]                                                                                                                                                                                                                                                                                          | 0.1873  | –                        | 0.08 – 0.26 <sup>29</sup><br>[Thenappan]    | mmHg·ml <sup>-1</sup>   |
| 034 | $G_{VL}$       | Systemic venous elastance    | –                                                                                                                                                                                                                                                                                                                           | 0.0666  | –                        | –                                           | mmHg·ml <sup>-1</sup>   |
| 035 | $G_{VR}$       | Pulmonary venous elastance   | –                                                                                                                                                                                                                                                                                                                           | 0.0662  | –                        | –                                           | mmHg·ml <sup>-1</sup>   |
| 036 | $GFR$          | Glomerular filtration rate   | Values of right atrial pressure and renal blood flow [Damman], acute and chronic kidney disease [Levey], [Juretzko], early postpartum period [Lafayette], cirrhosis [Wong]                                                                                                                                                  | 0.1102  | –                        | 0.060 – 0.135<br>[Levin],<br>[Cachat]       | l·min <sup>-1</sup>     |
| 037 | $g_{O_2}$      | Oxygen consumption           | –                                                                                                                                                                                                                                                                                                                           | 3.8816  | –                        | $\approx 4.2$<br>[Treacher]                 | ml·s <sup>-1</sup>      |
| 038 | $H$            | Neurohumoral factor          | –                                                                                                                                                                                                                                                                                                                           | 1.3114  | 1.17 [Proshin<br>MATLAB] | –                                           | s <sup>-1</sup>         |
| 039 | $Heart_{Rate}$ | Heart rate                   | Age, gender, race [Ostchega], type 1 diabetes [Škrtić], exercise [Wright, 2018], [Lenz], positive-pressure ventilation [Kyh]l                                                                                                                                                                                               | 79.1721 | –                        | 60 – 100<br>[Ostchega]                      | beats·min <sup>-1</sup> |

<sup>28</sup> Total arterial compliance (TAC) is the inverse of arterial stiffness [Papaioannou], which we used to estimate the values of  $G_{AL}$ . We found the following ranges of TAC (in ml/mmHg) obtained by various methods of assessment in control subjects without cardiovascular disease:

- [Haluska], 82 individuals:  $1.59 \pm 0.50$  (pulse-pressure method),  $2.26 \pm 0.74$  (area method),  $2.47 \pm 0.74$  (stroke volume/pulse-pressure method).
- [Fujimoto], stroke volume/pulse-pressure method:  $1.8 \pm 0.6$  (14 individuals aged 21–34 years),  $1.8 \pm 0.5$  (19 individuals aged 35–49 years),  $2.0 \pm 0.6$  (23 individuals aged 50–64 years),  $1.2 \pm 0.3$  (14 individuals with age  $\geq 65$  years).
- [Chemla, 1998], 7 individuals:  $1.84 \pm 0.76$  (area method),  $1.91 \pm 0.76$  (stroke volume/pulse-pressure method).
- [Laskey, 1990], 11 individuals:  $0.752\text{--}1.700 \cdot 10^{-3}$  cm<sup>5</sup>/dyn (monoexponential aortic diastolic pressure decay),  $0.782\text{--}2.287 \cdot 10^{-3}$  cm<sup>5</sup>/dyn (Windkessel model) – taking into account the coefficient 1328 [Gómez] for converting units to ml/mmHg these are ranges 1.00–2.26 and 1.04–3.00 respectively.

Based on these data, we considered the range of 1.00–3.00 ml/mmHg for the total arterial compliance and the range of 0.33 – 1.00 mmHg/MLI for  $G_{AL}$ .

<sup>29</sup> The range of values of the pulmonary arterial compliance (the inverse of the pulmonary arterial stiffness, which we used to estimate the values of  $G_{AR}$ ) is 3.8 – 12.0 ml/mmHg [Thenappan].



|     |              |                                              |                                                                                                                                                                                                                            |           |                             |                                                   |                                                  |
|-----|--------------|----------------------------------------------|----------------------------------------------------------------------------------------------------------------------------------------------------------------------------------------------------------------------------|-----------|-----------------------------|---------------------------------------------------|--------------------------------------------------|
| 040 | $K_{FG}$     | Filtration coefficient                       | –                                                                                                                                                                                                                          | 0.0052    | –                           | 0.0039–0.0162<br>[Hoang]                          | $l \cdot \text{min}^{-1} \cdot \text{mmHg}^{-1}$ |
| 041 | $K_L$        | Inotropic factor of the LV                   | –                                                                                                                                                                                                                          | 0.6250    | –                           | –                                                 | –                                                |
| 042 | $K_R$        | Inotropic factor of the RV                   | –                                                                                                                                                                                                                          | 0.6250    | –                           | –                                                 | –                                                |
| 043 | $LA_{PULSE}$ | Left atrial pulse-wave                       | –                                                                                                                                                                                                                          | 0.0       | –                           | –                                                 | mmHg                                             |
| 044 | $M_{sod}$    | Total exchangeable sodium                    | Sodium Intake [Brown, 1970], edema due to heart disease [Farber], [Knud], hepatic disease with edema and/or ascites, renal disease with edema [Farber], open intracardiac operations [Pacifico], hypothyroidism [Surveyor] | 2831.3985 | 2850                        | 2040 – 3950<br>2837±500 <sup>30</sup><br>[Farber] | mEq                                              |
| 045 | $MAP$        | Mean arterial pressure                       | –                                                                                                                                                                                                                          | 90.0275   | –                           | 70 – 105<br>[Doenyas-Barak]                       | mmHg                                             |
| 046 | $N_{al}$     | Normalized aldosterone concentration         | –                                                                                                                                                                                                                          | 1.2730    | 1.0<br>[Karaaslan,<br>2005] | –                                                 | –                                                |
| 047 | $N_{als}$    | Normalized aldosterone secretion rate        | –                                                                                                                                                                                                                          | 1.2730    | –                           | –                                                 | –                                                |
| 048 | $nB$         | Baroreceptor activity                        | –                                                                                                                                                                                                                          | 0.6607    | –                           | –                                                 | –                                                |
| 049 | $nD$         | Weariness receptor activity                  | –                                                                                                                                                                                                                          | 0.1506    | –                           | –                                                 | –                                                |
| 050 | $nH$         | Myocardial sympathetic inotropic sensitivity | –                                                                                                                                                                                                                          | 0.3316    | –                           | –                                                 | –                                                |
| 051 | $nS$         | Stress receptor activity                     | Stress mode [S-D]                                                                                                                                                                                                          | 0.1780    | –                           | 0.0 – 1.0 [Proshin]                               | –                                                |
| 052 | $nSum$       | Cardiac center activity                      | –                                                                                                                                                                                                                          | 1.4041    | –                           | –                                                 | –                                                |
| 053 | $nV$         | Respiratory receptor activity                | –                                                                                                                                                                                                                          | 0.3413    | –                           | –                                                 | –                                                |
| 054 | $osmolality$ | Blood osmolality                             | –                                                                                                                                                                                                                          | 285.2374  | –                           | 275 – 295 [Fogarty]                               | $\text{mOsm} \cdot \text{kg}^{-1}$               |
| 055 | $P_{AL}$     | Systemic arterial pressure                   | –                                                                                                                                                                                                                          | 89.8166   | –                           | –                                                 | mmHg                                             |
| 056 | $P_{AR}$     | Pulmonary arterial pressure                  | –                                                                                                                                                                                                                          | 13.2730   | –                           | –                                                 | mmHg                                             |
| 057 | $P_{AR\_D}$  | Diastolic pulmonary arterial pressure        | Cardiomyopathy, coronary artery disease [Pagani], exercise [Wright, 2018]                                                                                                                                                  | 12.0825   | –                           | 4 – 12<br>[Marini], [Pagani]                      | mmHg                                             |
| 058 | $P_{AR\_S}$  | Systolic pulmonary arterial pressure         | Cardiomyopathy, coronary artery disease [Pagani], exercise [Wright, 2018]                                                                                                                                                  | 18.5647   | –                           | 15 – 30<br>[Marini], [Pagani]                     | mmHg                                             |
| 059 | $P_D$        | Diastolic blood pressure                     | Exhaustive exercise-induced tissue hypoxia [Lenz]                                                                                                                                                                          | 77.9518   | 80                          | < 90<br>[Oparil]                                  | mmHg                                             |

<sup>30</sup> The value  $M_{sod}$  is determined by the dilution of radioisotopic sodium <sup>22</sup>N or <sup>24</sup>N. In [Farber], the mean value ± SD is 2896 ± 479 mEq. However, if these values are calculated directly from the data provided by the authors for 27 control individuals, the estimate is 2837 ± 500 mEq.

|     |             |                                       |                                                                                                                                                                                                                                     |          |                      |                                    |                                                          |
|-----|-------------|---------------------------------------|-------------------------------------------------------------------------------------------------------------------------------------------------------------------------------------------------------------------------------------|----------|----------------------|------------------------------------|----------------------------------------------------------|
| 060 | $P_{gh}$    | Glomerular hydrostatic pressure       | Type 1 diabetes [Škrtić]                                                                                                                                                                                                            | 59.1569  | –                    | 48.0 – 63.0 [Guberina]             | mmHg                                                     |
| 061 | $P_{go}$    | Glomerular capillary oncotic pressure | Type 1 diabetes [Škrtić], early postpartum period [Lafayette]                                                                                                                                                                       | 28.0322  | 27.3                 | $27.3 \pm 2.6$ [Škrtić]            | mmHg                                                     |
| 062 | $P_{HL}$    | LV pressure                           | –                                                                                                                                                                                                                                   | 9.0599   | –                    | –                                  | mmHg                                                     |
| 063 | $P_{HL\_D}$ | LV diastolic pressure                 | Cardiomyopathy, coronary artery disease [Pagani], diastolic heart dysfunction due to essential hypertension [Stefanadis]                                                                                                            | 9.0599   | –                    | 3 – 12 [Pagani]                    | mmHg                                                     |
| 064 | $P_{HL\_S}$ | LV systolic pressure                  | Cardiomyopathy, coronary artery disease [Pagani], diastolic heart dysfunction due to essential hypertension [Stefanadis]                                                                                                            | 134.9507 | 130 [Proshin MATLAB] | 100 – 140 [Pagani]                 | mmHg                                                     |
| 065 | $P_{HR}$    | RV pressure                           | –                                                                                                                                                                                                                                   | 4.8451   | –                    | –                                  | mmHg                                                     |
| 066 | $P_{HR\_D}$ | RV diastolic pressure                 | Cardiomyopathy, coronary artery disease [Pagani], exercise [Wright, 2018]                                                                                                                                                           | 4.8451   | –                    | 2 – 8 [Pagani]                     | mmHg                                                     |
| 067 | $P_{HR\_S}$ | RV systolic pressure                  | Cardiomyopathy, coronary artery disease [Pagani], exercise [Wright, 2018]                                                                                                                                                           | 20.9558  | 20                   | 15 – 30 [Pagani]                   | mmHg                                                     |
| 068 | $P_{ra}$    | Normalized right atrial pressure      | –                                                                                                                                                                                                                                   | 0.8620   | –                    | –                                  | mmHg                                                     |
| 069 | $P_S$       | Systolic blood pressure               | Extracellular fluid volume [Faucon], type 1 diabetes and renal hyperfiltration [Škrtić], exhaustive exercise-induced tissue hypoxia [Lenz]                                                                                          | 114.1788 | 120                  | < 140 [Oparil]                     | mmHg                                                     |
| 070 | $P_{VL}$    | Systemic venous pressure              | –                                                                                                                                                                                                                                   | 5.3039   | –                    | 2 – 8 <sup>31</sup> [Klingensmith] | mmHg                                                     |
| 071 | $P_{VR}$    | Pulmonary venous pressure             | Cardiomyopathy, coronary artery disease [Pagani]                                                                                                                                                                                    | 9.4499   | –                    | 3 – 20 <sup>32</sup>               | mmHg                                                     |
| 072 | $P_{RA}$    | Plasma renin activity                 | Type 1 diabetes [Bojestig], [Škrtić], [Valabhji], race [Tu], saline infusion [Ishimitsu], exhaustive exercise-induced tissue hypoxia [Lenz], primary and secondary aldosteronism, hypertension [Glinicki], aldosterone level [Wang] | 27.8513  | –                    | 15.0 – 31.7 [Valabhji]             | $\text{fmol} \cdot \text{ml}^{-1} \cdot \text{min}^{-1}$ |

<sup>31</sup> This is the reference range for the central venous pressure (right atrial pressure).

<sup>32</sup> The value of  $P_{VR}$  cannot be measured directly. The pulmonary capillary wedge pressure (PCWP) can be used for the indirect estimation. The normal range of PCWP is 2–15 mmHg [Klingensmith]. The mean value of  $P_{VR}$  is intermediate between the mean PCWP and the mean value of  $P_{AR}$ , and is approximately 30% higher than the PCWP [Chaliki] (shown for dogs). Therefore, we assumed 3 – 20 mmHg as the range for  $P_{VR}$ .

|     |                            |                                                              |                                                                                                                                                                            |           |                          |                             |                           |
|-----|----------------------------|--------------------------------------------------------------|----------------------------------------------------------------------------------------------------------------------------------------------------------------------------|-----------|--------------------------|-----------------------------|---------------------------|
| 073 | <i>PRC</i>                 | Plasma renin concentration                                   | Race [Tu], sodium intake [Wambach], primary and secondary aldosteronism, hypertension [Glinicki], chronic kidney disease [Juretzko]                                        | 27.3948   | <i>PRC<sub>nom</sub></i> | 3.42 – 69.4 [Perschel]      | pg·ml <sup>-1</sup>       |
| 074 | <i>R<sub>a</sub></i>       | Resistance of afferent vessels (arteries and arterioles)     | –                                                                                                                                                                          | 26.0578   | –                        | –                           | mmHg·min·ml <sup>-1</sup> |
| 075 | <i>R<sub>a_dyne</sub></i>  | <i>R<sub>a</sub></i> in dyn·s·sm <sup>-5</sup>               | Type 1 diabetes [Škrtić]                                                                                                                                                   | 2076.2867 | –                        | 1555 ± 635 [App. B]         | dyn·s·sm <sup>-5</sup>    |
| 076 | <i>R<sub>aa</sub></i>      | Single-afferent arteriole resistance                         | –                                                                                                                                                                          | 1.7746E7  | –                        | –                           | mmHg·min·l <sup>-1</sup>  |
| 077 | <i>R<sub>aa_0</sub></i>    | Nominal single-afferent arteriole resistance                 | –                                                                                                                                                                          | 0.9317E7  | –                        | –                           | mmHg·min·l <sup>-1</sup>  |
| 078 | <i>R<sub>e</sub></i>       | Resistance of all efferent arterioles                        | –                                                                                                                                                                          | 32.9348   | –                        | –                           | mmHg·min·ml <sup>-1</sup> |
| 079 | <i>R<sub>e_dyne</sub></i>  | <i>R<sub>e</sub></i> in dyn·s·sm <sup>-5</sup>               | –                                                                                                                                                                          | 2624.2428 | –                        | 2270 ± 364 [App. B]         | dyn·s·sm <sup>-5</sup>    |
| 080 | <i>R<sub>ea</sub></i>      | Single-efferent arteriole resistance                         | –                                                                                                                                                                          | 9.0571E7  | –                        | –                           | mmHg·min·l <sup>-1</sup>  |
| 081 | <i>R<sub>ea_0</sub></i>    | Nominal single-efferent arteriole resistance                 | –                                                                                                                                                                          | 4.0073E7  | –                        | –                           | mmHg·min·l <sup>-1</sup>  |
| 082 | <i>R<sub>preglom</sub></i> | Resistance of interlobar, arcuate, and interlobular arteries | –                                                                                                                                                                          | 19.6049   | –                        | 10.0 – 20.0 [Hallow, 2017a] | mmHg·min·l <sup>-1</sup>  |
| 083 | <i>R<sub>sec</sub></i>     | Renin secretion rate                                         | –                                                                                                                                                                          | 1.5824    | –                        | –                           | –                         |
| 084 | <i>RA<sub>PULSE</sub></i>  | Right atrial pulse-wave                                      | –                                                                                                                                                                          | 0.0       | –                        | –                           | mmHg                      |
| 085 | <i>RBF</i>                 | Renal blood flow                                             | Type 1 diabetes and renal hyperfiltration [Cherney], [Škrtić], hydropenia with hypertension [Willassen], cardiac dysfunction, secondary to pulmonary hypertension [Damman] | 1.1847    | –                        | 0.623 – 1.730 [Bax]         | l·min <sup>-1</sup>       |
| 086 | <i>RPF</i>                 | Renal plasma flow                                            | Cardiac dysfunction, secondary to pulmonary hypertension [Damman], cirrhosis [Wong], type 1 diabetes and renal hyperfiltration [Cherney], [Škrtić]                         | 0.7108    | –                        | 0.628 ± 0.162 [Škrtić]      | l·min <sup>-1</sup>       |
| 087 | <i>RSNA</i>                | Renal sympathetic nerve activity                             | –                                                                                                                                                                          | 1.2179    | –                        | –                           | –                         |
| 088 | <i>RVR</i>                 | Renal vascular resistance                                    | Type 1 diabetes and renal hyperfiltration [Cherney], [Škrtić], hypertension, age with hypertension [Bauer], cirrhosis [Wong]                                               | 70.9276   | –                        | 55.1 – 83.6 [App. B]        | mmHg·min·l <sup>-1</sup>  |

|     |                                       |                                  |                                                                                                                                                                         |           |                      |                                      |                        |
|-----|---------------------------------------|----------------------------------|-------------------------------------------------------------------------------------------------------------------------------------------------------------------------|-----------|----------------------|--------------------------------------|------------------------|
| 089 | <i>SV</i>                             | LV stroke volume                 | Age [Cain], hypertension, exercise in hypertensive [Cl roux] and healthy individuals [Wright, 2018], hypobaric hypoxia [Holloway], positive-pressure ventilation [Kyh]l | 62.5264   | 83.0                 | 39.1 – 115.3 (age 18+) [Cattermole]  | ml                     |
| 090 | <i>Systole</i>                        | Total actual systole indicator   | –                                                                                                                                                                       | 0.0       | –                    | –                                    | –                      |
| 091 | <i>Systole<sub>L</sub></i>            | Actual LV systole indicator      | –                                                                                                                                                                       | 0.0       | 1.0 [Proshin MATLAB] | –                                    | –                      |
| 092 | <i>Systole<sub>L_Exp</sub></i>        | Nominal LV systole indicator     | –                                                                                                                                                                       | 0.0       | –                    | –                                    | –                      |
| 093 | <i>Systole<sub>Length_L</sub></i>     | Actual LV systole duration       | –                                                                                                                                                                       | 0.2642    | –                    | –                                    | s                      |
| 094 | <i>Systole<sub>Length_L_Exp</sub></i> | Nominal LV systole duration      | –                                                                                                                                                                       | 0.2642    | –                    | –                                    | s                      |
| 095 | <i>Systole<sub>Length_R</sub></i>     | Actual RV systole duration       | –                                                                                                                                                                       | 0.2642    | –                    | –                                    | s                      |
| 096 | <i>Systole<sub>Length_R_Exp</sub></i> | Nominal RV systole duration      | –                                                                                                                                                                       | 0.2642    | –                    | –                                    | s                      |
| 097 | <i>Systole<sub>R</sub></i>            | Actual RV systole indicator      | –                                                                                                                                                                       | 0.0       | 1.0 [Proshin MATLAB] | –                                    | –                      |
| 098 | <i>Systole<sub>R_Exp</sub></i>        | Nominal RV systole indicator     | –                                                                                                                                                                       | 0.0       | –                    | –                                    | –                      |
| 099 | <i>TBW</i>                            | Total body water <sup>33</sup>   | Weight, height, age, gender [Skrabal, 1973], [Deurenberg], hypothyroid [Surveyor]                                                                                       | 37.7037   | 40.0                 | 24.45 – 56.63 <sup>34</sup> [Hoffer] | l                      |
| 100 | <i>TPR</i>                            | Total peripheral resistance      | Hypertension, exercise [Cl roux]                                                                                                                                        | 18.1861   | –                    | 12.5 – 22.5 [Daly]                   | mmHg·min <sup>-1</sup> |
| 101 | <i>V</i>                              | Total blood volume <sup>35</sup> | Weight, height [Feldschuh]                                                                                                                                              | 4853.9658 | –                    | 3061 – 6092 [Wennesland]             | ml                     |
| 102 | <i>V<sub>AL</sub></i>                 | Systemic arterial blood volume   | –                                                                                                                                                                       | 612.5806  | 0.13·V [Hall]        | –                                    | ml                     |

<sup>33</sup> Tritium oxide (<sup>3</sup>H<sub>2</sub>O, T<sub>2</sub>O), deuterium oxide (<sup>2</sup>H<sub>2</sub>O, D<sub>2</sub>O) and antipyrine are markers for measuring the total body water [Hall]. D<sub>2</sub>O gives a fairly accurate estimate [Moore, 1946] (tested in rabbits). Measurement with antipyrine is associated with a larger error [Ljunggren]. <sup>3</sup>H<sub>2</sub>O gives the same water volume as D<sub>2</sub>O [Prentice]. In addition to methods associated with the injection of these markers into the organism, non-invasive methods can also be used: Dual-energy X-ray absorptiometry, air displacement plethysmography, nuclear magnetic resonance spectroscopy, and bioelectrical impedance analysis [Roumelioti]. The result of the latter correlates well with the <sup>3</sup>H<sub>2</sub>O space [Hoffer], but on average gives a slightly less value than the D<sub>2</sub>O space [Smith], [Raimann].

<sup>34</sup> The following *TBW* estimates obtained in healthy individuals were found in the literature: 37.09 – 56.63 (20 individuals, tritium) [Hoffer], 35.82 – 51.53 (18 men, deuterium), 24.45 – 35.47 (14 women, deuterium) [Pichler]. The mean *TBW* values for different men and women age groups are given in [Chumlea].

<sup>35</sup> The indicator for measuring blood volume is Cr-labeled red blood cells, or this volume can be calculated as Plasma volume/(1 – Hematocrit) [Hall]. The latter formula is used, for example, in [Gibson], where plasma volume is determined using the dye T-1824 (Evans blue) administered intravenously. The corresponding estimate for the blood volume is 2990 – 6980 ml.

|     |                                     |                                          |                                                                                        |           |                                         |                                                       |    |
|-----|-------------------------------------|------------------------------------------|----------------------------------------------------------------------------------------|-----------|-----------------------------------------|-------------------------------------------------------|----|
| 103 | $V_{AR}$                            | Pulmonary arterial blood volume          | –                                                                                      | 157.6286  | $0.035 \cdot V^{36}$<br>[Gazioglu]      | –                                                     | ml |
| 104 | $V_{ecf}$                           | Extracellular fluid volume <sup>37</sup> | Weight, height, age, gender [Deurenberg], open intracardiac operations [Pacifco]       | 16.6504   | –                                       | –                                                     | l  |
| 105 | $V_{HL}$                            | LV blood volume                          | –                                                                                      | 88.7840   | $0.03 \cdot V$                          | –                                                     | ml |
| 106 | $V_{HL\_KD}$                        | LV end-diastolic volume                  | Age, gender [Maceira, 2006a], [Cain], [Hudsmith], positive-pressure ventilation [Kyhl] | 100.4978  | 140.0<br>[Proshin<br>MATLAB]            | M: 67 – 155<br>W: 56 – 104<br>[Lang]                  | ml |
| 107 | $V_{HL\_KS}$                        | LV end-systolic volume                   | Age, gender [Maceira, 2006a], [Cain], [Hudsmith], positive-pressure ventilation [Kyhl] | 37.9714   | –                                       | M: 22 – 58<br>W: 19 – 49<br>[Lang]                    | ml |
| 108 | $V_{HR}$                            | RV blood volume                          | –                                                                                      | 83.0649   | $0.03 \cdot V$                          | –                                                     | ml |
| 109 | $V_{HR\_KD}$                        | RV end-diastolic volume                  | Age, gender [Hudsmith], [Maceira, 2006b], positive-pressure ventilation [Kyhl]         | 100.4978  | 140.0<br>[Proshin<br>MATLAB]            | M: 124 – 256<br>W: 78 – 218<br>[Hudsmith]             | ml |
| 110 | $V_{HR\_KS}$                        | RV end-systolic volume                   | Age, gender [Hudsmith], [Maceira, 2006b], positive-pressure ventilation [Kyhl]         | 37.9714   | –                                       | M: 38 – 118<br>W: 20 – 92<br>[Hudsmith]               | ml |
| 111 | $V_{VL}$                            | Systemic venous blood volume             | –                                                                                      | 3493.4664 | $0.71 \cdot V^{38}$<br>[Hall], [Magder] | ~ 2000 – 3500<br>[Hall]                               | ml |
| 112 | $V_{VR}$                            | Pulmonary venous blood volume            | –                                                                                      | 418.4412  | $0.065 \cdot V^{39}$<br>[Gazioglu]      | –                                                     | ml |
| 113 | $V_{AR} + V_{VR}$                   | Pulmonary blood volume                   | –                                                                                      | 576.0699  | –                                       | ~ $0.09 \cdot V - 0.10 \cdot V$<br>[Hall], [Gazioglu] | ml |
| 114 | $V_{AR} + V_{VR} + V_{HR} + V_{HL}$ | Cardiopulmonary blood volume             | –                                                                                      | 747.9188  | –                                       | ~ $0.153 \cdot V$<br>[Levinson]                       | ml |
| 115 | $VO_2$                              | Venous oxygen content                    | –                                                                                      | 0.1369    | 0.15 [Proshin<br>MATLAB]                | 0.095 – 0.168<br>[Hattori]                            | –  |

<sup>36</sup> 35% of the value  $V_{AR} + V_{VR}$ .

<sup>37</sup> There are substantial differences in estimates of the extracellular fluid volume  $V_{ecf}$  depending on the exogenous markers (usually radioactive compounds) used for the measurement [Roumelioti]. The use of radiosulfate in [Walser] gives the range of 7.6 – 15.9 liters. The use of radiobromine in [Tarazi] leads to the range of 13.9 – 21.4 liters. The estimation of  $V_{ecf}$  can be also performed by the modern methods [Roumelioti]: evaluation of body composition (e.g. bioimpedance analysis [Dou], [Raimann]); MRI; simultaneous measurement of  $TBW$  and potassium; estimation of  $GFR$  using exogenous markers with extracellular distribution, etc.

<sup>38</sup> 64% are from veins, 7% are from arterioles and capillaries.

<sup>39</sup> 45% of the value  $V_{AR} + V_{VR}$  are from veins, 20% are from capillaries.

|     |                                                                |                                                                                                                                              |                                                                                                                                                                                                                                                        |          |   |                                              |                                                    |
|-----|----------------------------------------------------------------|----------------------------------------------------------------------------------------------------------------------------------------------|--------------------------------------------------------------------------------------------------------------------------------------------------------------------------------------------------------------------------------------------------------|----------|---|----------------------------------------------|----------------------------------------------------|
| 116 | $Y_{ALVL}$                                                     | Conductivity of systemic microvessels (venules, capillaries and arterioles)                                                                  | –                                                                                                                                                                                                                                                      | 1.5989   | – | –                                            | $\text{ml}\cdot\text{s}^{-1}\cdot\text{mmHg}^{-1}$ |
| 117 | $Y_{ARVR}$                                                     | Conductivity of pulmonary microvessels (venules, capillaries and arterioles)                                                                 | –                                                                                                                                                                                                                                                      | 15.2889  | – | –                                            | $\text{ml}\cdot\text{s}^{-1}\cdot\text{mmHg}^{-1}$ |
| 118 | $Y_{VLHR}$                                                     | Conductivity of the tricuspid valve and systemic veins                                                                                       | –                                                                                                                                                                                                                                                      | 109.3040 | – | –                                            | $\text{ml}\cdot\text{s}^{-1}\cdot\text{mmHg}^{-1}$ |
| 119 | $Y_{VRHL}$                                                     | Conductivity of the mitral valve and pulmonary veins                                                                                         | –                                                                                                                                                                                                                                                      | 89.6326  | – | –                                            | $\text{ml}\cdot\text{s}^{-1}\cdot\text{mmHg}^{-1}$ |
| 120 | $\frac{1}{Y_{HLAL}} + \frac{1}{Y_{ALVL}} + \frac{1}{Y_{VLHR}}$ | Systemic vascular resistance (can be estimated by total peripheral resistance <i>TPR</i> )                                                   | Aortic valve stenosis [Laskey, 2009], congestive heart failure secondary to idiopathic dilated cardiomyopathy [Laskey, 1990], cardiomyopathy, coronary artery disease [Pagani], diastolic heart dysfunction due to essential hypertension [Stefanadis] | 0.7774   | – | 0.5271 – 1.2048 <sup>40</sup> [Klingensmith] | $\text{s}\cdot\text{mmHg}\cdot\text{ml}^{-1}$      |
| 121 | $\frac{1}{Y_{HRAR}} + \frac{1}{Y_{ARVR}} + \frac{1}{Y_{VRHL}}$ | Pulmonary vascular resistance                                                                                                                | Mitral or aortic valve disease [Gazioglu], cardiomyopathy, coronary artery disease [Pagani], diastolic heart dysfunction due to essential hypertension [Stefanadis], exercise [Wright, 2018], pulmonary hypertension [Gan]                             | 0.0941   | – | 0.0151 – 0.0979 <sup>41</sup> [Klingensmith] | $\text{s}\cdot\text{mmHg}\cdot\text{ml}^{-1}$      |
| 122 | $\alpha_{map}$                                                 | Effect of mean arterial pressure on renal sympathetic nerve activity                                                                         | –                                                                                                                                                                                                                                                      | 1.2264   | – | –                                            | –                                                  |
| 123 | $\alpha_{rap}$                                                 | Effect of right atrial pressure on renal sympathetic nerve activity                                                                          | –                                                                                                                                                                                                                                                      | 0.9931   | – | –                                            | –                                                  |
| 124 | $\beta_{rsna}$                                                 | Effect of renal sympathetic nerve activity on afferent arteriole resistance and resistance of interlobar, arcuate, and interlobular arteries | –                                                                                                                                                                                                                                                      | 1.3269   | – | –                                            | –                                                  |

<sup>40</sup> 700–1600  $\text{dyn}\cdot\text{s}\cdot\text{cm}^{-5}$  [Klingensmith] using the factor 1/1328 for the units conversion to  $\text{s}\cdot\text{mmHg}\cdot\text{ml}^{-1}$  [Gómez].

<sup>41</sup> 20–130  $\text{dyn}\cdot\text{s}\cdot\text{cm}^{-5}$  [Klingensmith] using the factor 1/1328 for the units conversion to  $\text{s}\cdot\text{mmHg}\cdot\text{ml}^{-1}$  [Gómez].

|     |                                                                                         |                                                                                         |                                                                                                               |        |   |                                                      |   |
|-----|-----------------------------------------------------------------------------------------|-----------------------------------------------------------------------------------------|---------------------------------------------------------------------------------------------------------------|--------|---|------------------------------------------------------|---|
| 125 | $\gamma_{at}$                                                                           | Effect of AT1-bound angiotensin II on $\eta_{pt\_sodreab}$                              | –                                                                                                             | 0.9973 | – | –                                                    | – |
| 126 | $\gamma_{filsod}$                                                                       | Effect of filtered sodium load on $\eta_{pt\_sodreab}$                                  | –                                                                                                             | 1.0876 | – | –                                                    | – |
| 127 | $\gamma_{rsna}$                                                                         | Effect of renal sympathetic nerve activity on $\eta_{pt\_sodreab}$                      | –                                                                                                             | 1.0114 | – | –                                                    | – |
| 128 | $\eta_{cd\_sodreab}$                                                                    | Fractional collecting duct sodium reabsorption                                          | –                                                                                                             | 0.9404 | – | –                                                    | – |
| 129 | $\eta_{dt\_sodreab}$                                                                    | Fractional distal tubule sodium reabsorption                                            | –                                                                                                             | 0.5093 | – | –                                                    | – |
| 130 | $\eta_{pt\_sodreab}$                                                                    | Fractional sodium reabsorption in the proximal tubule and the loop of Henle             | Cirrhosis [Simón], race [Bochud], type 1 diabetes [Hannedouche], acute ischemic renal failure [Suzuki]        | 0.8776 | – | M: 0.795 ± 0.083<br>W: 0.793 ± 0.084<br>[Seidlerová] | – |
| 131 | $\eta_{dt\_sodreab} + \eta_{cd\_sodreab} - \eta_{dt\_sodreab} \cdot \eta_{cd\_sodreab}$ | Fractional sodium reabsorption in the distal tubule and subsequent parts of the nephron | Race [Bochud], type 1 diabetes [Hannedouche], insulin infusion [Skøtt], acute ischemic renal failure [Suzuki] | 0.9707 | – | M: 0.946 ± 0.032<br>W: 0.950 ± 0.031<br>[Seidlerová] | – |
| 132 | $\lambda_{amp}$                                                                         | Effect of atriopeptin on $n_{cd\_sodreab}$                                              | –                                                                                                             | 0.9984 | – | –                                                    | – |
| 133 | $\lambda_{dt}$                                                                          | Effect of distal tubule sodium outflow on $n_{cd\_sodreab}$                             | –                                                                                                             | 1.0465 | – | –                                                    | – |
| 134 | $\mu_{adh}$                                                                             | Effect of vasopressin concentration on tubular water reabsorption rate                  | –                                                                                                             | 0.8903 | – | –                                                    | – |
| 135 | $v_{AT1\_ANGII}$                                                                        | Effect of AT1-bound angiotensin II on renin secretion rate                              | –                                                                                                             | 1.0424 | – | –                                                    | – |
| 136 | $v_{MD\_sod}$                                                                           | Effect of macula densa sodium flow on renin secretion rate                              | –                                                                                                             | 1.1425 | – | –                                                    | – |
| 137 | $v_{RSNA}$                                                                              | Effect of renal sympathetic nerve activity on renin secretion rate                      | –                                                                                                             | 1.1501 | – | –                                                    | – |
| 138 | $\xi_{at}$                                                                              | Effect of angiotensin hormone on aldosterone secretion rate                             | –                                                                                                             | 1.2730 | – | –                                                    | – |
| 139 | $\xi_{k\_sod}$                                                                          | Effect of potassium concentration on aldosterone secretion rate                         | –                                                                                                             | 1.0000 | – | –                                                    | – |

|     |                      |                                                                                                           |                                                                                                                                                                |         |                         |                                                                       |                       |
|-----|----------------------|-----------------------------------------------------------------------------------------------------------|----------------------------------------------------------------------------------------------------------------------------------------------------------------|---------|-------------------------|-----------------------------------------------------------------------|-----------------------|
| 140 | $\Sigma_{myo}$       | Myogenic autoregulation signal                                                                            | –                                                                                                                                                              | 0.9883  | 1.0                     | –                                                                     | –                     |
| 141 | $\Sigma_{igf}$       | Tubuloglomerular feedback signal                                                                          | –                                                                                                                                                              | 0.6459  | 1.0<br>[Karaaslan 2005] | –                                                                     | –                     |
| 142 | $\Phi_{cd\_sodreab}$ | Absolute collecting duct sodium reabsorption rate                                                         | –                                                                                                                                                              | 0.8911  | –                       | –                                                                     | mEq·min <sup>-1</sup> |
| 143 | $\Phi_{dt\_sod}$     | Distal tubule sodium outflow                                                                              | –                                                                                                                                                              | 0.9476  | –                       | –                                                                     | mEq·min <sup>-1</sup> |
| 144 | $\Phi_{dt\_sodreab}$ | Absolute distal tubule sodium reabsorption rate                                                           | –                                                                                                                                                              | 0.9836  | –                       | –                                                                     | mEq·min <sup>-1</sup> |
| 145 | $\Phi_{filsod}$      | Amount of sodium filtered from the glomerulus to the proximal tubule per unit time (filtered sodium load) | Cirrhosis [Wong], acute ischemic renal failure [Suzuki]                                                                                                        | 15.7808 | –                       | 13.0 – 19.0 <sup>42</sup><br>[Natarajan],<br>[Hannedouche],<br>[Boer] | mEq·min <sup>-1</sup> |
| 146 | $\Phi_{md\_sod}$     | Macula densa sodium flow                                                                                  | –                                                                                                                                                              | 1.9312  | –                       | –                                                                     | mEq·min <sup>-1</sup> |
| 147 | $\Phi_{pt\_sodreab}$ | Absolute proximal tubular sodium reabsorption rate                                                        | –                                                                                                                                                              | 13.8496 | –                       | –                                                                     | mEq·min <sup>-1</sup> |
| 148 | $\Phi_{t\_wreab}$    | Tubular water reabsorption rate                                                                           | –                                                                                                                                                              | 0.1088  | –                       | –                                                                     | l·min <sup>-1</sup>   |
| 149 | $\Phi_u$             | Urine flow rate                                                                                           | Type 1 diabetes and renal hyperfiltration [Cherney]                                                                                                            | 0.0015  | –                       | 0.0011 ± 0.0005<br>(1.65 ± 0.70 l/day)<br>[Malisova]                  | l·min <sup>-1</sup>   |
| 150 | $\Phi_{u\_sod}$      | Urine sodium flow                                                                                         | Essential hypertension [Cowley], [Ferrario], salt intake [Ishimitsu], extracellular fluid volume [Faucon], type 1 diabetes and renal hyperfiltration [Cherney] | 0.0565  | –                       | 0.097 ± 0.049<br>(140 ± 70 mEq/day)<br>[Letcher]                      | mEq·min <sup>-1</sup> |
| 151 | $\Phi_{win}$         | Water intake                                                                                              | –                                                                                                                                                              | 0.0015  | –                       | 0.0019 ± 0.0007<br>(2.75 ± 1.01 l/day)<br>[Malisova]                  | l·min <sup>-1</sup>   |
| 152 | $\Psi_{al}$          | Effect of aldosterone concentration on fractional distal tubule sodium reabsorption                       | –                                                                                                                                                              | 1.0186  | –                       | –                                                                     | –                     |

<sup>42</sup> The ranges for healthy individuals (mmol/min): 15.4 ± 2.0 (low-salt diet), 17.1 ± 2.4 (high-salt diet) [Natarajan]; 18.11 ± 1.88 [Hannedouche], 15.7±2.1 [Boer].



|     |                       |                                                                                                    |   |          |   |   |    |
|-----|-----------------------|----------------------------------------------------------------------------------------------------|---|----------|---|---|----|
| 153 | $\Psi_{AT1\_aa}$      | Effect of AT1-bound angiotensin II on afferent arteriole resistance                                | – | 2.2484   | – | – | –  |
| 154 | $\Psi_{AT1\_ALVL}$    | Effect of AT1-bound angiotensin II on blood flow through the systemic microvessels                 | – | 1.7702   | – | – | –  |
| 155 | $\Psi_{AT1\_Baro}$    | Effect of AT1-bound angiotensin II on baroreceptor activity                                        | – | 0.9882   | – | – | –  |
| 156 | $\Psi_{AT1\_ea}$      | Effect of AT1-bound angiotensin II on efferent arteriole resistance                                | – | 2.2601   | – | – | –  |
| 157 | $\Psi_{AT1\_preglom}$ | Effect of AT1-bound angiotensin II on resistance of interlobar, arcuate, and interlobular arteries | – | 1.4949   | – | – | –  |
| 158 | $\Psi_{AT1\_Stress}$  | Effect of AT1-bound angiotensin II on stress receptor activity                                     | – | 0.9954   | – | – | –  |
| 159 | $\omega_{AL}$         | Unstressed volume of systemic arteries                                                             | – | 514.8097 | – | – | ml |
| 160 | $\omega_{AR}$         | Unstressed volume of pulmonary arteries                                                            | – | 86.7566  | – | – | ml |

## APPENDIX B. DERIVATION OF THE FORMULA FOR THE RENAL BLOOD FLOW CALCULATION

The following vessels define the total renal vascular resistance  $RVR$  [Hall]:

- A. interlobar, arcuate, and interlobular arteries;
- B. afferent arterioles;
- C. glomerular capillaries;
- D. efferent arterioles;
- E. peritubular capillaries;
- F. interlobar, interlobular, and arcuate veins.

**Table B1.** Determination of the renal vascular resistance as the sum of resistances of separate vessels. The column "Clinical measurements" indicates whether the corresponding study gives a clinical estimation of these resistances in healthy individuals or not.

| Reference       | Clinical measurements | Vessels |   |   |   |   |   |
|-----------------|-----------------------|---------|---|---|---|---|---|
|                 |                       | A       | B | C | D | E | F |
| Karaaslan, 2005 | –                     | –       | + | – | + | – | – |
| Karaaslan, 2014 | –                     | –       | + | – | + | – | – |
| Hallow, 2014    | –                     | +       | + | – | + | – | – |
| Hallow, 2017a   | –                     | +       | + | – | + | + | – |
| Gómez, 1951     | +                     | +       |   | + |   | + |   |
| Škrtić, 2015    | +                     | +       |   | + |   | + |   |

According to [Gómez], the  $RVR$  value, defined as the ratio of the difference between mean arterial pressure ( $MAP$ ) and renal venous pressure  $P_v$  to renal blood flow ( $RBF$ ), can be represented as the sum of three components:

$$RVR = \frac{MAP - P_v}{RBF} = R_a + \frac{RBF - GFR}{RBF} \cdot R_e + R_v, \quad (1)$$

where  $R_a$  is the resistance of afferent vessels (arteries and arterioles),  $R_e$  denotes the resistance of efferent arterioles,  $R_v$  corresponds to the resistance of renal veins,  $GFR$  is the glomerular filtration rate, and the factor  $(RBF - GFR)/RBF$  characterizes the contribution to  $RVR$  of the glomerular filtrate which is reabsorbed by the peritubular capillaries. To determine  $R_a$ ,  $R_e$  and  $R_v$ , the mean pressure values in glomerular ( $P_{gh}$ ) and peritubular ( $P_t$ ) capillaries are used:

$$R_a = \frac{MAP - P_{gh}}{RBF}, \quad R_e = \frac{P_{gh} - P_t}{RBF - GFR}, \quad R_v = \frac{P_t - P_v}{RBF}. \quad (2)$$

Thus, the resistances of these capillaries are respectively subsumed in the calculated values of  $R_a$  and  $R_e$ , as well as  $R_e$  and  $R_v$ .

The  $GFR$  value is defined depending on the hydrostatic pressure in the Bowman's space  $P_B$  and the oncotic pressure  $P_{go}$  with the constant  $K_{FG} = 0.0867 \text{ ml} \cdot \text{s}^{-1} \cdot \text{mmHg}^{-1}$  [Škrtić]:

$$GFR = K_{FG} \cdot (P_{gh} - P_B - P_{go}). \quad (3)$$

The study [Gómez] makes the assumption that  $P_t \approx P_B + P_{go}$ , which in the combination with (2) and (3) gives the following equation for  $R_e$ :

$$R_e = \frac{GFR}{K_{FG} \cdot (RBF - GFR)}. \quad (4)$$

Since later studies showed that this assumption is incorrect [Digne-Malcolm], we did not use the data obtained by the formula (4) in articles [Gómez] and [Škrtić] as reference values. Instead, we

estimated  $R_a$ ,  $R_e$ , and  $R_v$  using formulas (2) and (3) with constants  $P_{go} = 25$  mmHg,  $P_B = 10$  mmHg [Gómez],  $P_i = 25$  mmHg, and  $P_v = 6$  mmHg [Digne-Malcolm] for renal hemodynamic parameters in 8 healthy volunteers [van der Bel]. We used the value 1328 [Gómez] as the conversion factor of  $RVR$  units from  $\text{mmHg}\cdot\text{s}\cdot\text{ml}^{-1}$  to  $\text{dyn}\cdot\text{s}\cdot\text{cm}^{-5}$ . The estimation results are shown in Table B2.

**Table B2.** Estimation of  $R_a$ ,  $R_e$  and  $R_v$  using parameters of renal hemodynamics in 8 healthy volunteers [van der Bel].

| №    | van der Bel <i>et al.</i> , 2016 |               |               | Design parameters |                                |                                |                                |                   |
|------|----------------------------------|---------------|---------------|-------------------|--------------------------------|--------------------------------|--------------------------------|-------------------|
|      | MAP<br>mmHg                      | GFR<br>ml/min | RBF<br>ml/min | $P_{gh}$<br>mmHg  | $R_a$<br>dyn·s/cm <sup>5</sup> | $R_e$<br>dyn·s/cm <sup>5</sup> | $R_v$<br>dyn·s/cm <sup>5</sup> | RVR<br>mmHg·min/l |
| 1    | 88                               | 124           | 1257.1        | 58.84             | 1848                           | 2379                           | 1204                           | 65.2              |
| 2    | 85                               | 104           | 944.4         | 54.99             | 2532                           | 2843                           | 1603                           | 83.6              |
| 3    | 80                               | 138           | 1333.3        | 61.53             | 1104                           | 2435                           | 1135                           | 55.5              |
| 4    | 84                               | 151           | 1680.0        | 64.03             | 947                            | 2034                           | 901                            | 46.4              |
| 5    | 74                               | 101           | 1233.3        | 54.42             | 1265                           | 2070                           | 1228                           | 55.1              |
| 6    | 86                               | 110           | 1075.0        | 56.15             | 2213                           | 2572                           | 1408                           | 74.4              |
| 7    | 83                               | 89            | 1383.3        | 52.11             | 1779                           | 1669                           | 1094                           | 55.7              |
| 8    | 78                               | 147           | 1560.0        | 63.26             | 753                            | 2157                           | 970                            | 46.2              |
| mean | 82                               | 121           | 1308.3        | 58.16             | 1555                           | 2270                           | 1193                           | 60.3              |
| SD   | 5                                | 23            | 239.9         | 4.42              | 635                            | 364                            | 228                            | 13.3              |

From the formulas (1) and (2), we find the equations for  $RBF$  and  $P_{gh}$ :

$$RBF = \frac{MAP - P_v + GFR \cdot R_e}{R_a + R_e + R_v}, \quad P_{gh} = MAP - RBF \cdot R_a.$$

Taking into account the formula (3), we obtain:

$$RBF = \frac{MAP - P_v + K_{FG} \cdot R_e \cdot (MAP - P_B - P_{go})}{R_a + R_e + R_v + K_{FG} \cdot R_e \cdot R_a}.$$

When modeling a healthy person, we assume that  $R_v$  is the constant equal to the mean normal value of  $1193 \text{ dyn}\cdot\text{s}\cdot\text{cm}^{-5} \approx 15 \text{ mmHg}\cdot\text{min}\cdot\text{l}^{-1}$  (Table B2).

## APPENDIX C. MODELING THE PATIENTS WITH CARDIOVASCULAR DISEASES

**Table C1.** List of the fitted parameters with normal and abnormal search intervals used to generate equilibrium states corresponding to patients with cardiovascular diseases.

| №  | Parameter, notation in the model                            | Ranges/values     |                             | Units                   | Justification of ranges                                                                                                                                                                                                                                                                                                                                                                                                                                                           |
|----|-------------------------------------------------------------|-------------------|-----------------------------|-------------------------|-----------------------------------------------------------------------------------------------------------------------------------------------------------------------------------------------------------------------------------------------------------------------------------------------------------------------------------------------------------------------------------------------------------------------------------------------------------------------------------|
|    |                                                             | Normal            | Abnormal                    |                         |                                                                                                                                                                                                                                                                                                                                                                                                                                                                                   |
| 01 | Total metabolic intensity, $A_1$                            | 0.00032 – 0.00128 | –                           | ml <sup>-1</sup>        | The normal initial value $A_1 = 0.0008 \text{ ml}^{-1}$ with deviation of 60%, which is the allowable fluctuation in basal metabolic rate (closely related to oxygen consumption) in people with the same weight [Henry].                                                                                                                                                                                                                                                         |
| 02 | Sympathetic sensitivity of systemic microvessels, $A_3$     | 0.1               | Hypertension<br>0.1 – 0.6   | ml·mmHg <sup>-1</sup>   | Parameter $A_3$ is used to calculate conductivity of systemic microvessels $Y_{ALVL}$ , which contributes most to systemic vascular resistance $SVR = 1/Y_{HLAL} + 1/Y_{ALVL} + 1/Y_{VLHR}$ . An increase of $A_3$ to $0.6 \text{ ml} \cdot \text{mmHg}^{-1}$ without changing the other parameters leads in the model to growing $SVR$ to $1.5 \text{ s} \cdot \text{mmHg} \cdot \text{ml}^{-1}$ , the typical value in patients with hypertension [Stefanadis], [Prys-Roberts]. |
| 03 | Sympathetic sensitivity of pulmonary microvessels, $A_{13}$ | 0.65              | PH<br>0.65 – 3.90           | ml·mmHg <sup>-1</sup>   | Pulmonary hypertension (PH) is related to the chronic elevation of pulmonary vascular resistance ( $PVR$ ) [Chemla, 2002]. One way to enlarge $PVR$ in the model (as in the case of $SVR$ ) is the increase of the $A_{13}$ value. By analogy with $A_3$ , we considered a possible change in $A_{13}$ up to 6 times of the normal value.                                                                                                                                         |
| 04 | Systemic arterial tone, $A_9$                               | 0.07              | Hypertension<br>0.07 – 0.09 | mmHg·s·ml <sup>-1</sup> | Sustained increases in arterial tone are an essential component in the development of hypertension [Amberg]. Thus, we assumed an increase in the normal value of $A_9$ up to 25%.                                                                                                                                                                                                                                                                                                 |
| 05 | Pulmonary arterial tone, $A_{19}$                           | 0.02              | PH<br>0.02 – 0.04           | mmHg·s·ml <sup>-1</sup> | By analogy with the parameter $A_9$ , we assumed a possible increase in the normal value of $A_{19}$ in patients with PH.                                                                                                                                                                                                                                                                                                                                                         |
| 06 | Normal vasopressin level, $C_{adh, norm}$                   | 1.0 – 13.3        | –                           | pg·ml <sup>-1</sup>     | The normal range [Yarmohammadi].                                                                                                                                                                                                                                                                                                                                                                                                                                                  |
| 07 | Normal aldosterone level, $C_{al, norm}$                    | 70 – 300          | –                           | pg·ml <sup>-1</sup>     | The normal range [Fischbach].                                                                                                                                                                                                                                                                                                                                                                                                                                                     |
| 08 | Normal atriopeptin level, $C_{anp, norm}$                   | 7.4 – 152.0       | –                           | ng·l <sup>-1</sup>      | The normal ranges: 27–152 ng·l <sup>-1</sup> [Nozuki], 7.4–15.7 ng·l <sup>-1</sup> [Cannone].                                                                                                                                                                                                                                                                                                                                                                                     |
| 09 | Oxygen capacity of hemoglobin, $C_H$                        | 1.32 – 1.39       | –                           | ml·g <sup>-1</sup>      | The normal range [Dijkhuizen].                                                                                                                                                                                                                                                                                                                                                                                                                                                    |
| 10 | Serum potassium, $C_K$                                      | 3.5 – 5.5         | –                           | mEq·l <sup>-1</sup>     | The normal range [Rastegar].                                                                                                                                                                                                                                                                                                                                                                                                                                                      |
| 11 | Afferent arteriole diameter, $d_{aa}$                       | 8.7 – 23.9        | –                           | μm                      | Neal et al. estimated the value of $d_{aa}$ for normal human glomeruli at physiological hydrostatic and oncotic pressures at $21.5 \pm 2.4 \text{ μm}$ [Neal]. Hill et al. give values of $15.7 \pm 4.9 \text{ μm}$ for hypertensive patients with proteinuria and/or azotemia, with no evidence of other renal disease, and $13.4 \pm 4.7 \text{ μm}$ for normotensive nondiabetic patients, aged 37 – 85 years [Hill].                                                          |

|    |                                                               |                              |                                                                             |                                  |                                                                                                                                                                                                                                                                                                                                                                                                                                                                                                                                                                                                                                                      |
|----|---------------------------------------------------------------|------------------------------|-----------------------------------------------------------------------------|----------------------------------|------------------------------------------------------------------------------------------------------------------------------------------------------------------------------------------------------------------------------------------------------------------------------------------------------------------------------------------------------------------------------------------------------------------------------------------------------------------------------------------------------------------------------------------------------------------------------------------------------------------------------------------------------|
| 12 | Efferent arteriole diameter, $d_{ea}$                         | 12.2 – 20.1                  | –                                                                           | $\mu\text{m}$                    | The value of $d_{ea}$ was estimated at $15.9 \pm 2.4 \mu\text{m}$ [Neal]. We assumed a possible deviation from this range by 10%.                                                                                                                                                                                                                                                                                                                                                                                                                                                                                                                    |
| 13 | Action threshold of the Frank-Starling law, $FS_{threshold0}$ | 0.0 – 40.0                   | –                                                                           | ml                               | Parameter $FS_{threshold0}$ is an auxiliary characteristic describing the pump function of the ventricle. The range was taken from the application "Physiological Avatar" (version 2020.9.14.0) on the website <a href="https://physiological-avatar.azurewebsites.net/index.aspx">https://physiological-avatar.azurewebsites.net/index.aspx</a> .                                                                                                                                                                                                                                                                                                   |
| 14 | Basic systemic arterial elastance, $G_{ALO}$                  | 0.33 – 1.00                  | Hypertension<br>0.33 – 1.67<br>CHF, LVH<br>0.33 – 2.38<br>PH<br>0.71 – 1.43 | $\text{mmHg}\cdot\text{ml}^{-1}$ | The normal range of systemic arterial compliance (SAC), the inverse of systemic arterial stiffness [Papaioannou], used for $G_{ALO}$ evaluation, is $1.00 - 3.00 \text{ ml}\cdot\text{mmHg}^{-1}$ (Table A4). In hypertensive patients, SAC is reduced on average by 40% [Haluska]. SAC in patients with CHF: $1.2 - 1.7 \text{ ml}\cdot\text{mmHg}^{-1}$ in low $PVR$ ( $<200 \text{ dyn}\cdot\text{s}\cdot\text{cm}^{-5}$ ), and $0.7 - 1.4 \text{ ml}\cdot\text{mmHg}^{-1}$ in high $PVR$ [Melenovsky]. In healthy subjects and patients with miscellaneous cardiac diseases SAC is $0.42 - 2.63 \text{ ml}\cdot\text{mmHg}^{-1}$ [Chemla, 2017]. |
| 15 | Basic pulmonary arterial elastance, $G_{ARO}$                 | 0.08 – 0.26                  | CHF<br>0.08 – 0.50<br>PH<br>0.26 – 2.50                                     | $\text{mmHg}\cdot\text{ml}^{-1}$ | The normal range of pulmonary arterial compliance (PAC), the inverse of pulmonary arterial stiffness, used for the $G_{ARO}$ evaluation, is $3.8 - 12.0 \text{ ml}\cdot\text{mmHg}^{-1}$ in normal subjects, and $0.4 - 3.8 \text{ ml}\cdot\text{mmHg}^{-1}$ in patients with PH [Thenappan]. PAC in patients with heart failure: $2.0 - 3.3 \text{ ml}\cdot\text{mmHg}^{-1}$ in low $PVR$ ( $<200 \text{ dyn}\cdot\text{s}\cdot\text{cm}^{-5}$ ), $0.8 - 1.5 \text{ ml}\cdot\text{mmHg}^{-1}$ in high $PVR$ [Melenovsky].                                                                                                                           |
| 16 | LV wall elasticity, $G_{HL}$                                  | 0.01 – 0.43                  | Hypertension<br>0.02 – 0.72                                                 | $\text{mmHg}\cdot\text{ml}^{-1}$ | The normal range of $G_{HL}$ in the relaxation phase in subjects without cardiovascular disease is $0.01-0.43$ ( $0.16 \pm 0.11$ ) $\text{mmHg}\cdot\text{ml}^{-1}$ [Zhang, 2008]. In hypertensive patients, the LV wall compliance (the inverse of stiffness [Zhang, 2008]) is decreased by about 40% [Safar, 1985]. The range of $G_{HR}$ values is taken similarly to $G_{HL}$ .                                                                                                                                                                                                                                                                  |
| 17 | RV wall elasticity, $G_{HR}$                                  |                              |                                                                             |                                  |                                                                                                                                                                                                                                                                                                                                                                                                                                                                                                                                                                                                                                                      |
| 18 | Basic elasticity of systemic veins, $G_{VLO}$                 | 0.01 – 0.05                  | –                                                                           | $\text{mmHg}\cdot\text{ml}^{-1}$ | The normal value of $G_{VLO}$ by the [Proshin] model is $0.0375 \text{ mmHg}\cdot\text{ml}^{-1}$ . According to our estimates for a healthy person, this value is $0.0108 \text{ mmHg}\cdot\text{ml}^{-1}$ . As the normal range of variations, we assumed the interval $0.01 - 0.05 \text{ mmHg}\cdot\text{ml}^{-1}$ . The normal range of $G_{VRO}$ is done similarly to $G_{VLO}$ .                                                                                                                                                                                                                                                               |
| 19 | Basic elasticity of pulmonary veins, $G_{VRO}$                |                              |                                                                             |                                  |                                                                                                                                                                                                                                                                                                                                                                                                                                                                                                                                                                                                                                                      |
| 20 | Plasma glucose, $glucose$                                     | 3.9 – 6.1                    | –                                                                           | $\text{mmol}\cdot\text{l}^{-1}$  | The normal range [Dedov].                                                                                                                                                                                                                                                                                                                                                                                                                                                                                                                                                                                                                            |
| 21 | Hematocrit, $Hct$                                             | M: 40 – 54<br>W: 36 – 48     | –                                                                           | %                                | The normal range [Billett] for mens (M) and womens (W).                                                                                                                                                                                                                                                                                                                                                                                                                                                                                                                                                                                              |
| 22 | Hemoglobin, $He$                                              | M: 140 – 180<br>W: 120 – 160 | –                                                                           | $\text{g}\cdot\text{l}^{-1}$     | The normal range [Billett] for mens (M) and womens (W).                                                                                                                                                                                                                                                                                                                                                                                                                                                                                                                                                                                              |
| 23 | Baroreceptor sensitivity, $Heart_{Baro}$                      | 0.60                         | Atherosclerosis<br>0.45 – 0.60                                              | –                                | The baroreflex decreases with carotid and coronary atherosclerosis [Ziegler]. Therefore, we assumed a possible decrease in the $Heart_{Baro}$ value by 25% for this group of patients.                                                                                                                                                                                                                                                                                                                                                                                                                                                               |
| 24 | Cardiac center basic activity, $Heart_{Base}$                 | 0.01 – 1.00                  | –                                                                           | –                                | The fitted normal value of $Heart_{Base}$ is given in Table A3. As a range of values we assumed the interval from 0.01 to 1.00.                                                                                                                                                                                                                                                                                                                                                                                                                                                                                                                      |

|    |                                                          |                     |                                     |                                                  |                                                                                                                                                                                                                                                                                                                                                                                                                                                                                                                                                                   |
|----|----------------------------------------------------------|---------------------|-------------------------------------|--------------------------------------------------|-------------------------------------------------------------------------------------------------------------------------------------------------------------------------------------------------------------------------------------------------------------------------------------------------------------------------------------------------------------------------------------------------------------------------------------------------------------------------------------------------------------------------------------------------------------------|
| 25 | The $\omega_{AL}/V_{AL}$ ratio, $k_{AL}$                 | 0.7 – 1.0           | –                                   | –                                                | A stressed component of blood volume, which determines flow, is about 30% [Magder]. Thus, as the range of $k_{AL}$ , $k_{AR}$ , $k_{VL}$ , and $k_{VR}$ we considered the interval from 0.7 to 1.0.                                                                                                                                                                                                                                                                                                                                                               |
| 26 | The $\omega_{AR}/V_{AR}$ ratio, $k_{AR}$                 |                     |                                     |                                                  |                                                                                                                                                                                                                                                                                                                                                                                                                                                                                                                                                                   |
| 27 | The $\omega_{VL}/V_{VL}$ ratio, $k_{VL}$                 |                     |                                     |                                                  |                                                                                                                                                                                                                                                                                                                                                                                                                                                                                                                                                                   |
| 28 | The $\omega_{VR}/V_{VR}$ ratio, $k_{VR}$                 |                     |                                     |                                                  |                                                                                                                                                                                                                                                                                                                                                                                                                                                                                                                                                                   |
| 29 | The $\omega_{HL}/V_{HL}$ ratio, $k_{HL}$                 | 0.0 – 0.3           | CHF<br>0.0 – 0.7                    | –                                                | The normal range is explained in Table A3. As the range in patients with heart diseases we considered the interval 0.0 – 0.7.                                                                                                                                                                                                                                                                                                                                                                                                                                     |
| 30 | The $\omega_{HR}/V_{HR}$ ratio, $k_{HR}$                 |                     |                                     |                                                  |                                                                                                                                                                                                                                                                                                                                                                                                                                                                                                                                                                   |
| 31 | Normal filtration coefficient, $K_{FG,0}$                | 0.0039 – 0.0162     | –                                   | $l \cdot \text{min}^{-1} \cdot \text{mmHg}^{-1}$ | The normal range estimated in healthy volunteers [Hoang].                                                                                                                                                                                                                                                                                                                                                                                                                                                                                                         |
| 32 | Aortic regurgitation (AR) coefficient, $K_{HLAL}$        | 0.0                 | AR: 0.0 – 0.3                       | –                                                | The normal value of coefficients is 0.0. In patients with some valve regurgitation, the corresponding parameter takes values 0.0 – 0.3 [S-D]. We divided this range depending on the regurgitation stage: 0.0 – 0.1 (mild), 0.1 – 0.2 (moderate), 0.2 – 0.3 (severe).                                                                                                                                                                                                                                                                                             |
| 33 | Pulmonary regurgitation (PR) coefficient, $K_{HRAR}$     |                     | PR: 0.0 – 0.3                       |                                                  |                                                                                                                                                                                                                                                                                                                                                                                                                                                                                                                                                                   |
| 34 | Tricuspid regurgitation (TR) coefficient, $K_{VLHR}$     |                     | TR: 0.0 – 0.3                       |                                                  |                                                                                                                                                                                                                                                                                                                                                                                                                                                                                                                                                                   |
| 35 | Mitral regurgitation (MR) coefficient, $K_{VRHL}$        |                     | MR: 0.0 – 0.3                       |                                                  |                                                                                                                                                                                                                                                                                                                                                                                                                                                                                                                                                                   |
| 36 | LV inotropic status, $K_{LO}$                            | 0.5 – 0.8           | CHF, LVH<br>0.4 – 0.8               | –                                                | The normal range and the range in patients with chronic heart failure (CHF) are given in [Solodyannikov]. We used the same range as for CHF in patients with LV hypertrophy (LVH). Parameter fitting of the model to physiology values of patients with PH and the reduced value (about 25%) of ejection fraction [Wright, 2017] gives values of 0.2 – 0.3 for $K_{LO}$ and $K_{RO}$ .                                                                                                                                                                            |
| 37 | RV inotropic status, $K_{RO}$                            |                     | PH<br>0.2 – 0.8                     |                                                  |                                                                                                                                                                                                                                                                                                                                                                                                                                                                                                                                                                   |
| 38 | Afferent arteriole length, $L_{aa}$                      | 101 – 123           | –                                   | $\mu\text{m}$                                    | The normal value 112 $\mu\text{m}$ of $L_{aa}$ is taken from [Neal]. As a possible range of fluctuations, we assumed the deviation from this value by 10%.                                                                                                                                                                                                                                                                                                                                                                                                        |
| 39 | Efferent arteriole length, $L_{ea}$                      | 124 – 152           | –                                   | $\mu\text{m}$                                    | The normal value 138 $\mu\text{m}$ of $L_{ea}$ is taken from [Neal]. As a possible range of fluctuations, we assumed the deviation from this value by 10%.                                                                                                                                                                                                                                                                                                                                                                                                        |
| 40 | Initial value of total exchangeable sodium, $M_{sod}(0)$ | 2040 – 3950         | –                                   | mEq                                              | The initial value range of $M_{sod}$ in healthy humans is taken from the work [Farber].                                                                                                                                                                                                                                                                                                                                                                                                                                                                           |
| 41 | Number of nephrons in the kidneys, $N_{nephrons}$        | $1.50E6$ – $3.00E6$ | Hypertension<br>$0.80E6$ – $2.75E6$ | –                                                | The average number of glomeruli in one human kidney is 895,711, with an overall 12.8-fold range from 210,332 to 2,702,079 [Bertram]. Our estimate of the normal value of two kidneys in a healthy person is $N_{nephrons} = 2.75E6$ (Table A3). Patients with hypertension could have 30% fewer glomeruli than individuals without this disease, with an average of approximately 600,000 glomeruli per kidney [Hoy]. As the lower bound of $N_{nephrons}$ , we took this value multiplied by two and reduced by the standard deviation given in the study [Hoy]. |

|    |                                                                                      |             |                            |                          |                                                                                                                                                                                                                                                                                                                                                                                                                                                                                                                                                                                                          |
|----|--------------------------------------------------------------------------------------|-------------|----------------------------|--------------------------|----------------------------------------------------------------------------------------------------------------------------------------------------------------------------------------------------------------------------------------------------------------------------------------------------------------------------------------------------------------------------------------------------------------------------------------------------------------------------------------------------------------------------------------------------------------------------------------------------------|
| 42 | Normal fractional distal tubule sodium reabsorption, $n_{\epsilon_{dt}}$             | 0.3 – 0.7   | –                          | –                        | As the normal range of $n_{\epsilon_{dt}}$ we considered the interval from 0.3 to 0.7. This parameter is fitted so that the value $n_{\epsilon_{dt}} + n_{\eta_{cd}} - n_{\eta_{cd}} \cdot n_{\epsilon_{dt}}$ remains within the normal range 0.78 – 0.98 (Table C2).                                                                                                                                                                                                                                                                                                                                    |
| 43 | Normal fractional collecting duct sodium reabsorption, $n_{\eta_{cd}}$               | 0.6 – 1.0   | –                          | –                        | As the normal range of $n_{\eta_{cd}}$ , we considered the interval from 0.6 to 1.0. This parameter is fitted so that the value $n_{\epsilon_{dt}} + n_{\eta_{cd}} - n_{\eta_{cd}} \cdot n_{\epsilon_{dt}}$ remains within the normal range 0.78 – 0.98 (Table C2).                                                                                                                                                                                                                                                                                                                                      |
| 44 | Normal fractional proximal sodium reabsorption, $n_{\eta_{pt}}$                      | 0.67 – 0.97 | –                          | –                        | The normal estimates: $0.795 \pm 0.083$ (mans), $0.793 \pm 0.084$ (womans) [Seidlerová], $0.77 \pm 0.09$ (young), $0.87 \pm 0.06$ (elderly) [Fliser]. Randomly recruited 95 nuclear families of black South African ancestry: 0.908 – 0.958, and 103 nuclear families of white Belgian ancestry: 0.759 – 0.863 [Bochud]. Randomly recruited 317 untreated subjects from a white population: $0.892 \pm 0.054$ in low and $0.903 \pm 0.051$ in high sodium excretion [Jin].                                                                                                                               |
| 45 | Hydrostatic pressure in the Bowman's space, $P_B$                                    | 10 – 15     | –                          | mmHg                     | The normal range [Digne-Malcolm].                                                                                                                                                                                                                                                                                                                                                                                                                                                                                                                                                                        |
| 46 | Glomerular hydrostatic pressure, $P_{gh, norm}$                                      | 48.0 – 63.0 | –                          | mmHg                     | The normal estimates: $59.6 \pm 2.7$ mmHg [Škrtić], $54.3 \pm 4.5$ [Tsuda], 48.0 – 63.0 [Guberina].                                                                                                                                                                                                                                                                                                                                                                                                                                                                                                      |
| 47 | Initial value of glomerular capillary oncotic pressure, $P_{go}(0)$                  | 23.6 – 34.0 | –                          | mmHg                     | The value of $P_{go}$ in healthy individuals: $27.3 \pm 2.6$ mmHg [Škrtić], $26.0 \pm 2.4$ mmHg [Chagnac], $30.0 \pm 4.0$ mmHg [Guasch].                                                                                                                                                                                                                                                                                                                                                                                                                                                                 |
| 48 | Renal venous pressure, $P_v$                                                         | 6.0         | Hypertension<br>2.0 – 6.0  | mmHg                     | The normal value $P_v = 6$ mmHg is taken from [Digne-Malcolm]. In patients with essential hypertension, $P_v$ is decreased by more than 50% [Willassen]. Therefore, as the lower bound of this parameter we used 2 mmHg.                                                                                                                                                                                                                                                                                                                                                                                 |
| 49 | Normal plasma renin concentration, $PRC_{nom}$                                       | 3.42 – 69.4 | –                          | pg·ml <sup>-1</sup>      | The normal range [Perschel].                                                                                                                                                                                                                                                                                                                                                                                                                                                                                                                                                                             |
| 50 | Nominal resistance of interlobar, arcuate and interlobular arteries, $R_{preglom_0}$ | 7.0 – 20.0  | Hypertension<br>7.0 – 28.0 | mmHg·min·l <sup>-1</sup> | Hallow et al. give the normal range for $R_{preglom_0}$ of 10.0 – 20.0 mmHg·min·l <sup>-1</sup> [Hallow, 2017a], and consider 40% increase in the nominal value (from 14.0 to 19.6 mmHg·min·l <sup>-1</sup> ) in salt-resistant hypertensive patients [Hallow, 2017b]. The parameter estimation of our model resulted in the normal nominal value of 10.0 mmHg·min·l <sup>-1</sup> , and, therefore, we assumed the normal range of 7.0 – 20.0 mmHg·min·l <sup>-1</sup> . As the range in hypertensive patients, we considered 7.0 – 28.0 mmHg·min·l <sup>-1</sup> with 40% increase in the upper bound. |
| 51 | Renal venous resistance, $R_v$                                                       | 11.3 – 20.1 | –                          | mmHg·min·l <sup>-1</sup> | The estimate of $R_v$ in healthy persons is given in Appendix B.                                                                                                                                                                                                                                                                                                                                                                                                                                                                                                                                         |
| 52 | Body oxygen demand, $RO_{20}$                                                        | 2.52 – 5.88 | –                          | ml·s <sup>-1</sup>       | The average value of $RO_{20}$ is approximately 4.2 ml·s <sup>-1</sup> [Treacher]. We considered the deviation of this value by 40%.                                                                                                                                                                                                                                                                                                                                                                                                                                                                     |

|    |                                                                         |                                             |                                                                   |                                     |                                                                                                                                                                                                                                                                                                                                                                                                                                                                                                                                                                                                                                                                       |
|----|-------------------------------------------------------------------------|---------------------------------------------|-------------------------------------------------------------------|-------------------------------------|-----------------------------------------------------------------------------------------------------------------------------------------------------------------------------------------------------------------------------------------------------------------------------------------------------------------------------------------------------------------------------------------------------------------------------------------------------------------------------------------------------------------------------------------------------------------------------------------------------------------------------------------------------------------------|
| 53 | Arterial oxygen saturation, $SpO_2$                                     | 0.95 – 0.99                                 | Hypertension, CHF, PH<br>0.92 – 0.99                              | –                                   | $SpO_2$ is normally 95 – 99% [Goldberg]. As the lower bound in patients with cardiovascular diseases, we took the practical lower threshold to rule out hypoxaemia [Beasley].                                                                                                                                                                                                                                                                                                                                                                                                                                                                                         |
| 54 | Total protein, $TP$                                                     | 60.0 – 86.0                                 | –                                                                 | $g \cdot l^{-1}$                    | The normal ranges: 60.0 – 80.0 $g \cdot l^{-1}$ [Busher], 66.0 – 86.0 $g \cdot l^{-1}$ [Gardner].                                                                                                                                                                                                                                                                                                                                                                                                                                                                                                                                                                     |
| 55 | Plasma urea concentration, $urea$                                       | 1.8 – 7.1                                   | –                                                                 | $mmol \cdot l^{-1}$                 | The normal range [Hosten].                                                                                                                                                                                                                                                                                                                                                                                                                                                                                                                                                                                                                                            |
| 56 | Initial value of total body water, $TBW(0)$                             | $f(0.9 \cdot N_{BV}) - f(1.1 \cdot N_{BV})$ | CHF, class III/IV:<br>$f(0.9 \cdot N_{BV}) - f(1.4 \cdot N_{BV})$ | 1                                   | As the range of total blood volume ( $V$ ) in normal humans, we considered $N_{BV} \pm 10\%$ with the value $N_{BV}$ defined by the Nadler equation [Nadler]. In patients with NYHA classes III-IV, we used an increased upper bound of $V$ (up to 40%) [Miller]. We calculated the initial $TBW$ by the formula $f(x) = (x - 650)/111.5$ [Moore, 1967].                                                                                                                                                                                                                                                                                                              |
| 57 | Initial value of venous oxygen content, $VO_2(0)$                       | 0.0855 – 0.1848                             | –                                                                 | –                                   | $VO_2$ is normally 9.5 – 16.8 mL/dL [Hattori]. We considered additional deviation from this range by 10%.                                                                                                                                                                                                                                                                                                                                                                                                                                                                                                                                                             |
| 58 | Equilibrium ratio of $PRA$ to $PRC$ , $X_{PRC\_PRA}$                    | 0.61 – 1.42                                 | –                                                                 | $fmol \cdot min^{-1} \cdot pg^{-1}$ | The normal value of $X_{PRC\_PRA} = 1.016666 fmol \cdot min^{-1} \cdot pg^{-1}$ is given in [Hallow, 2014]. We assumed a deviation from this value of $\pm 40\%$ as the fluctuation range.                                                                                                                                                                                                                                                                                                                                                                                                                                                                            |
| 59 | Basic conductivity of systemic microvessels, $Y_{ALVLO}$                | 1.363                                       | Hypertension<br>CHF<br>PH<br>0.5 – 2.0                            | $ml \cdot s^{-1} \cdot mmHg^{-1}$   | Hypertension is associated with the $SVR$ elevation [Stefanadis], [Prys-Roberts], which can be caused by the decline in $Y_{ALVLO}$ . If we take $Y_{ALVLO} = 0.5 ml \cdot s^{-1} \cdot mmHg^{-1}$ instead of the normal value $1.363 ml \cdot s^{-1} \cdot mmHg^{-1}$ in the model, the $SVR$ level increases to the value $1.1 s \cdot mmHg \cdot ml^{-1}$ closed to the upper bound of the norm [Klingensmith]. In patients with PH and NYHA class III the value of $SVR$ can be also increased [Opitz]. Thus, as the reasonable range of values in patients with cardiovascular diseases we considered the interval $0.5 - 2.0 ml \cdot s^{-1} \cdot mmHg^{-1}$ . |
| 60 | Basic conductivity of pulmonary microvessels, $Y_{ARVRO}$               | 9.0 – 21.0                                  | LVH, PH<br>1.0 – 21.0                                             | $ml \cdot s^{-1} \cdot mmHg^{-1}$   | According to our estimates, the normal value of $Y_{ARVRO}$ is $15.0 ml \cdot s^{-1} \cdot mmHg^{-1}$ . We accept a deviation by $\pm 40\%$ . Without changing the other model parameters, such deviation gives the normal interval $0.074 - 0.138 s \cdot mmHg \cdot ml^{-1}$ for $PVR$ (see acceptable clinical evaluations of $PVR$ in Table C2). LVH and PH associated with the increased $PVR$ [Stefanadis], [Gan]. Thus, for these diseases, we considered the $Y_{ARVRO}$ range of $1.0 - 21.0 ml \cdot s^{-1} \cdot mmHg^{-1}$ resulting in the $PVR$ interval of $0.074 - 1.058 s \cdot mmHg \cdot ml^{-1}$ .                                                |
| 61 | Basic conductivity of the pulmonary valve and arteries, $Y_{HRAR}$      | 57.0                                        | PH<br>5.0 – 70.0                                                  | $ml \cdot s^{-1} \cdot mmHg^{-1}$   | We estimate $Y_{HRAR}$ in patients with PH and increased value of $PVR = 1/Y_{HRAR} + 1/Y_{ARVR} + 1/Y_{VRHL}$ . As the range of fluctuations, we used the interval of $5.0 - 70.0 ml \cdot s^{-1} \cdot mmHg^{-1}$ .                                                                                                                                                                                                                                                                                                                                                                                                                                                 |
| 62 | Basic conductivity of the mitral valve and pulmonary veins, $Y_{VRHLO}$ | 57.0                                        | LVDD<br>PH<br>5.0 – 70.0                                          | $ml \cdot s^{-1} \cdot mmHg^{-1}$   | The value of $Y_{VRHLO}$ directly affects transmitral flow $F_{VRHL}$ . Therefore, we varied this parameter in the case of patients with the LV diastolic dysfunction (LVDD), when $F_{VRHL}$ is altered [Caudron], [Kawaji]. We also estimate $Y_{VRHLO}$ in patients with PH and increased value of $PVR = 1/Y_{HRAR} + 1/Y_{ARVR} + 1/Y_{VRHL}$ . As the range of fluctuations, we used the interval of $5.0 - 70.0 ml \cdot s^{-1} \cdot mmHg^{-1}$ .                                                                                                                                                                                                             |



|    |                                                                     |                   |   |                       |                                                                                                                                                                                                          |
|----|---------------------------------------------------------------------|-------------------|---|-----------------------|----------------------------------------------------------------------------------------------------------------------------------------------------------------------------------------------------------|
| 63 | Nominal value of macula densa sodium flow rate, $\Phi_{md\_sod\_0}$ | 1.0 – 4.0         | – | mEq·min <sup>-1</sup> | According to our estimates for a healthy person, the value of $\Phi_{md\_sod\_0}$ is 3.32 mEq·min <sup>-1</sup> . As the fluctuation range, we considered the interval 1.0 – 4.0 mEq·min <sup>-1</sup> . |
| 64 | Sodium intake, $\Phi_{sodin}$                                       | 0.0280 – 0.2088   | – | mEq·min <sup>-1</sup> | The normal range 0.035 – 0.174 mEq·min <sup>-1</sup> is taken from the study [Luft]. We assumed a possible deviation from this range by 20%.                                                             |
| 65 | Normal value of water intake, $\Phi_{win\_norm}$                    | 0.00096 – 0.00312 | – | l·min <sup>-1</sup>   | The average statistical range estimate is $0.0019 \pm 0.0007$ l·min <sup>-1</sup> [Malisova]. We assumed a possible deviation from this range by 20%.                                                    |

**Table C2.** List of constraints imposed on the clinically measurable variables in patients with cardiovascular diseases and used in the model.

| №  | Variables, notation in the model  | Constraints   |                                                                                                                                                            | Units                 | Justification of constraints                                                                                                                                                                                                                                                                                                                                                                                                                                                                                                                                                                                                                                                                                                                                                                                                                                                                                                                                                      |
|----|-----------------------------------|---------------|------------------------------------------------------------------------------------------------------------------------------------------------------------|-----------------------|-----------------------------------------------------------------------------------------------------------------------------------------------------------------------------------------------------------------------------------------------------------------------------------------------------------------------------------------------------------------------------------------------------------------------------------------------------------------------------------------------------------------------------------------------------------------------------------------------------------------------------------------------------------------------------------------------------------------------------------------------------------------------------------------------------------------------------------------------------------------------------------------------------------------------------------------------------------------------------------|
|    |                                   | Normal        | Abnormal                                                                                                                                                   |                       |                                                                                                                                                                                                                                                                                                                                                                                                                                                                                                                                                                                                                                                                                                                                                                                                                                                                                                                                                                                   |
| 01 | Arterial oxygen content, $AO_2$   | 0.145 – 0.244 | –                                                                                                                                                          | –                     | The normal range [Hattori].                                                                                                                                                                                                                                                                                                                                                                                                                                                                                                                                                                                                                                                                                                                                                                                                                                                                                                                                                       |
| 02 | Plasma angiotensin (1-7), $ANG17$ | 14.1 – 31.7   | Hypertension<br>12.7 – 34.9                                                                                                                                | fmol·ml <sup>-1</sup> | The normal estimate is $22.9 \pm 8.8$ fmol·ml <sup>-1</sup> [Ferrario]. We extended the bounds by 10% in the case of hypertensive patients.                                                                                                                                                                                                                                                                                                                                                                                                                                                                                                                                                                                                                                                                                                                                                                                                                                       |
| 03 | Plasma angiotensin I, $ANGI$      | 2.8 – 13.6    | Hypertension<br>2.5 – 15.0                                                                                                                                 | fmol·ml <sup>-1</sup> | The normal estimate is $8.2 \pm 5.4$ fmol·ml <sup>-1</sup> [Nussberger]. We extended the bounds by 10% in the case of hypertensive patients.                                                                                                                                                                                                                                                                                                                                                                                                                                                                                                                                                                                                                                                                                                                                                                                                                                      |
| 04 | Plasma angiotensin II, $ANGII$    | 3.3 – 7.1     | CHF<br>3.3 – 14.0                                                                                                                                          | fmol·ml <sup>-1</sup> | The normal estimate is $5.2 \pm 1.9$ fmol·ml <sup>-1</sup> [Nussberger]. Patients with CHF: $4.2 – 14.0$ pmol·l <sup>-1</sup> [Smilde].                                                                                                                                                                                                                                                                                                                                                                                                                                                                                                                                                                                                                                                                                                                                                                                                                                           |
| 05 | Plasma vasopressin, $C_{adh}$     | 1.0 – 13.3    | CHF, class III/IV<br>1.0 – 23.3                                                                                                                            | pg·ml <sup>-1</sup>   | The normal range is given in [Yarmohammadi]. The estimations in patients with severe congestive heart failure and primary cardiomyopathy (classes III to IV, NYHA): $3.9 \pm 1.0$ and $14.5 \pm 8.8$ pg·ml <sup>-1</sup> [Riegger].                                                                                                                                                                                                                                                                                                                                                                                                                                                                                                                                                                                                                                                                                                                                               |
| 06 | Plasma aldosterone, $C_{al}$      | 70 – 300      | –                                                                                                                                                          | pg·ml <sup>-1</sup>   | The normal range [Fischbach].                                                                                                                                                                                                                                                                                                                                                                                                                                                                                                                                                                                                                                                                                                                                                                                                                                                                                                                                                     |
| 07 | Plasma atriopeptin, $C_{anp}$     | 7.4 – 152.0   | CHF, class I<br>37.1 – 152.0<br>CHF, class II<br>56.0 – 152.0<br>CHF, class III<br>161.0 – 253.0<br>CHF, class IV<br>257.0 – 838.0<br>CRF<br>133.0 – 305.0 | ng·l <sup>-1</sup>    | Normal ranges: $27 – 152$ ng·l <sup>-1</sup> [Nozuki], $7.4 – 15.7$ ng·l <sup>-1</sup> [Cannone], $20 \pm 7$ ng·l <sup>-1</sup> [Wei], $35.4 \pm 4.6$ ng·l <sup>-1</sup> [Kato]. There is no significant difference in plasma atriopeptin levels between man and woman [Nozuki]. Patients with congestive heart failure (CHF), NYHA I: $42.9 \pm 5.8$ ng·l <sup>-1</sup> [Kato], NYHA I-II: $68 \pm 12$ ng·l <sup>-1</sup> [Wei], NYHA III: $217 \pm 36$ ng·l <sup>-1</sup> , NYHA III-IV: $209 \pm 48$ ng·l <sup>-1</sup> [Wei], NYHA IV: $571 \pm 267$ ng·l <sup>-1</sup> [Nozuki]. Patients with chronic renal failure (CRF): $219 \pm 86$ ng·l <sup>-1</sup> [Nozuki]. The following diseases do not result in a significant difference of atriopeptin levels from the norm [Nozuki]: atrial fibrillation, pacemaker implantation, lung disease, chronic glomerulonephritis, nephrotic syndrome, essential hypertension [Cannone], liver disease and cerebrovascular disease. |
| 08 | Plasma sodium, $C_{sod}$          | 137 – 147     | –                                                                                                                                                          | mEq·l <sup>-1</sup>   | The normal range [Payne].                                                                                                                                                                                                                                                                                                                                                                                                                                                                                                                                                                                                                                                                                                                                                                                                                                                                                                                                                         |

|    |                                               |                                |                                                                           |                                    |                                                                                                                                                                                                                                                         |
|----|-----------------------------------------------|--------------------------------|---------------------------------------------------------------------------|------------------------------------|---------------------------------------------------------------------------------------------------------------------------------------------------------------------------------------------------------------------------------------------------------|
| 09 | Cardiac output, $CO$                          | 2.51 – 9.00                    | –                                                                         | $l \cdot \text{min}^{-1}$          | The normal range (age 18+) was taken from [Cattermole]. Patients with essential hypertension: $3.90 \pm 1.08 l \cdot \text{min}^{-1}$ [Cl  roux], $7.17 \pm 1.58 l \cdot \text{min}^{-1}$ [Safar, 1976].                                                |
| 10 | Ejection fraction, $EF$                       | 50 – 80                        | CHF<br>30 – 80<br>PH<br>20 – 80                                           | %                                  | The normal value is $EF \geq 50$ [Pfisterer]. In normal active subjects, $EF$ is reached 70 – 80% [Saghiv]. In patients with CHF, $EF$ can be reduced to 30% [Dushina]. In patients with PH, $EF$ can achieve 20% [Wright, 2017].                       |
| 11 | Systemic microvessels blood flow, $F_{ALVL}$  | > 0.0                          | –                                                                         | $\text{ml} \cdot \text{s}^{-1}$    | The constraint characterizes the movement of blood from the aorta to the right atrium strictly in one direction.                                                                                                                                        |
| 12 | Pulmonary microvessels blood flow, $F_{ARVR}$ | > 0.0                          | –                                                                         | $\text{ml} \cdot \text{s}^{-1}$    | The constraint characterizes the movement of blood from the pulmonary artery to the left atrium strictly in one direction.                                                                                                                              |
| 13 | Transaortic flow peak rate, $F_{HLAL_p}$      | 347.0 – 677.0                  | –                                                                         | $\text{ml} \cdot \text{s}^{-1}$    | The normal estimate is $512 \pm 165 \text{ ml} \cdot \text{s}^{-1}$ [Kyhl].                                                                                                                                                                             |
| 14 | Transpulmonary flow peak rate, $F_{HRAR_p}$   | 264.5 – 793.0                  | –                                                                         | $\text{ml} \cdot \text{s}^{-1}$    | The range of values was chosen in accordance with estimates in healthy individuals: $611 \pm 182 \text{ ml} \cdot \text{s}^{-1}$ [Kyhl], $463 \pm 71 \text{ ml} \cdot \text{s}^{-1}$ [Widya], $332.9 \pm 68.4 \text{ ml} \cdot \text{s}^{-1}$ [Macedo]. |
| 15 | Active peak RV filling rate, $F_{VLHR_{ap}}$  | M: 23 – 947<br>W: 54 – 680     | –                                                                         | $\text{ml} \cdot \text{s}^{-1}$    | As bounds, we considered the minimum and maximum values received for mans and womans for all ages (20–79 years) in the population of 120 individuals [Maceira, 2006b].                                                                                  |
| 16 | Early peak RV filling rate, $F_{VLHR_{ep}}$   | M: 8 – 814<br>W: -17 – 701     | –                                                                         | $\text{ml} \cdot \text{s}^{-1}$    |                                                                                                                                                                                                                                                         |
| 17 | $F_{VLHR_{ep}}/F_{VLHR_{ap}}$                 | M: -0.5 – 2.5<br>W: -0.4 – 2.5 | –                                                                         | –                                  |                                                                                                                                                                                                                                                         |
| 18 | Active peak LV filling rate, $F_{VRHL_{ap}}$  | M: 99 – 647<br>W: 58 – 508     | –                                                                         | $\text{ml} \cdot \text{s}^{-1}$    | As bounds, we considered the minimum and maximum values received for mans and womans for all ages (20–79 years) in the population of 120 individuals [Maceira, 2006a].                                                                                  |
| 19 | Early peak LV filling rate, $F_{VRHL_{ep}}$   | M: 21 – 1034<br>W: -13 – 967   | –                                                                         | $\text{ml} \cdot \text{s}^{-1}$    |                                                                                                                                                                                                                                                         |
| 20 | $F_{VRHL_{ep}}/F_{VRHL_{ap}}$                 | M: 0.3 – 5.9<br>W: 0.3 – 6.6   | –                                                                         | –                                  |                                                                                                                                                                                                                                                         |
| 21 | Systemic arterial elastance, $G_{AL}$         | 0.33 – 1.00                    | Hypertension<br>0.33 – 1.67<br>CHF, LVH<br>0.33 – 2.38<br>PH: 0.71 – 1.43 | $\text{mmHg} \cdot \text{ml}^{-1}$ | See parameter $G_{AL0}$ in Table C1 for details.                                                                                                                                                                                                        |
| 22 | Pulmonary arterial elastance, $G_{AR}$        | 0.08 – 0.26                    | CHF<br>0.08 – 0.50<br>PH: 0.26 – 2.50                                     | $\text{mmHg} \cdot \text{ml}^{-1}$ | See parameter $G_{AR0}$ in Table C1 for details.                                                                                                                                                                                                        |

|    |                                                                                                                                                           |               |                                                                                   |                           |                                                                                                                                                                                                                                                                                                                                                                                                                                                                                 |
|----|-----------------------------------------------------------------------------------------------------------------------------------------------------------|---------------|-----------------------------------------------------------------------------------|---------------------------|---------------------------------------------------------------------------------------------------------------------------------------------------------------------------------------------------------------------------------------------------------------------------------------------------------------------------------------------------------------------------------------------------------------------------------------------------------------------------------|
| 23 | Glomerular filtration rate, $GFR$                                                                                                                         | 0.060 – 0.135 | CHF<br>0.046 – 0.135<br>CRF<br>0.030 – 0.135                                      | $l \cdot \text{min}^{-1}$ | $GFR$ is normally (in the absence of evidence of kidney damage) 60 – 135 ml/min/1.73 m <sup>2</sup> [Levin], [Cachat]. Patients with CHF: $74 \pm 28$ ml/min/1.73 m <sup>2</sup> [Smilde]. As a lower bound in patients with chronic renal failure (CRF), we used 30 ml/min/1.73 m <sup>2</sup> [Levin].                                                                                                                                                                        |
| 24 | Heart rate, $Heart_{Rate}$                                                                                                                                | 60 – 100      | –                                                                                 | beats·min <sup>-1</sup>   | The normal range [Ostchega].                                                                                                                                                                                                                                                                                                                                                                                                                                                    |
| 25 | Total exchangeable sodium, $M_{sod}$                                                                                                                      | 2040 – 3950   | –                                                                                 | mEq                       | The normal range [Farber].                                                                                                                                                                                                                                                                                                                                                                                                                                                      |
| 26 | Normal fractional sodium reabsorption in the distal tubule and subsequent parts of the nephron, $n_{e\_dt} + n_{\eta\_cd} - n_{\eta\_cd} \cdot n_{e\_dt}$ | 0.78 – 0.98   | –                                                                                 | –                         | The normal estimates: $0.946 \pm 0.032$ (mans), $0.950 \pm 0.031$ (womans) [Seidlerová], $0.96 \pm 0.02$ (young), $0.92 \pm 0.06$ (elderly) [Fliser]. Randomly recruited 95 nuclear families of black South African ancestry: $0.850 - 0.948$ , and 103 nuclear families of white Belgian ancestry: $0.930 - 0.966$ [Bochud]. Randomly recruited 317 untreated subjects from a white population: $0.931 \pm 0.044$ in low and $0.859 \pm 0.074$ in high sodium excretion [Jin]. |
| 27 | Plasma osmolality, $osmolality$                                                                                                                           | 275 – 295     | –                                                                                 | mOsmol·kg <sup>-1</sup>   | The normal range [Fogarty].                                                                                                                                                                                                                                                                                                                                                                                                                                                     |
| 28 | Diastolic pulmonary arterial pressure, $P_{AR\_D}$                                                                                                        | 4.0 – 12.0    | CHF, class I<br>4.0 – 20.2<br>CHF, class II-IV<br>7.0 – 20.2<br>PH<br>12.3 – 50.0 | mmHg                      | Normal: 4.0 – 12.0 mmHg [Marini], [Pagani]. Evaluation in 882 healthy volunteers: $8.8 \pm 3.0$ mmHg [Kovacs]. Patients with isolated LVDD and NYHA class II/III: $11.0 \pm 4.0$ mmHg [Kasner, 2012]. Patients with NYHA class II: $14.4 \pm 5.8$ mmHg; patients with PH and NYHA class II/III: $22.4 \pm 10.1$ mmHg [Murch]. Patients with PH: $37.0 \pm 13.0$ mmHg [Gan].                                                                                                     |
| 29 | Systolic pulmonary arterial pressure, $P_{AR\_S}$                                                                                                         | 15.0 – 30.0   | CHF<br>14.0 – 44.2<br>PH<br>37.4 – 107.0                                          | mmHg                      | Normal: 15.0 – 30.0 mmHg [Marini], [Pagani]. Evaluation in 882 healthy humans: $20.8 \pm 4.4$ mmHg [Kovacs]. Patients with isolated LV diastolic dysfunction and NYHA class II/III: $22.0 \pm 8.0$ mmHg [Kasner, 2012]. Patients with NYHA class II: $35.4 \pm 8.8$ mmHg; patients with PH and NYHA class II/III: $60.2 \pm 22.8$ mmHg [Murch]. Patients with PH: $84.0 \pm 23.0$ mmHg [Gan].                                                                                   |
| 30 | Diastolic blood pressure, $P_D$                                                                                                                           | < 90          | Hypertension<br>> 90                                                              | mmHg                      | Definitions of hypertension based on the 2013 European Society of Hypertension and European Society of Cardiology guidelines [Oparil].                                                                                                                                                                                                                                                                                                                                          |
| 31 | Glomerular hydrostatic pressure, $P_{gh}$                                                                                                                 | 48.0 – 63.0   | –                                                                                 | mmHg                      | The normal estimates: $59.6 \pm 2.7$ mmHg [Škrčić], $54.3 \pm 4.5$ [Tsuda], 48.0 – 63.0 [Guberina].                                                                                                                                                                                                                                                                                                                                                                             |
| 32 | Glomerular capillary oncotic pressure, $P_{go}$                                                                                                           | 23.6 – 34.0   | –                                                                                 | mmHg                      | The range is given in Table C1 for the initial value of the parameter.                                                                                                                                                                                                                                                                                                                                                                                                          |

|    |                                                                                                      |             |                                                                                                                     |      |                                                                                                                                                                                                                                                                                                                                                                                                                                                                                                                                                                                                                                                                                                                        |
|----|------------------------------------------------------------------------------------------------------|-------------|---------------------------------------------------------------------------------------------------------------------|------|------------------------------------------------------------------------------------------------------------------------------------------------------------------------------------------------------------------------------------------------------------------------------------------------------------------------------------------------------------------------------------------------------------------------------------------------------------------------------------------------------------------------------------------------------------------------------------------------------------------------------------------------------------------------------------------------------------------------|
| 33 | LV diastolic pressure,<br>$P_{HL\_D}$                                                                | 3.0 – 12.0  | Hypertension<br>1.0 – 18.0<br>CHF, class I/II<br>1.0 – 18.9<br>CHF, class III/IV<br>4.3 – 18.9<br>LVH<br>1.0 – 20.0 | mmHg | Normal: 3 – 12 mmHg [Pagani]. The minimal LV pressure in patients without heart failure symptoms and with normal ejection fraction: 0.9 – 3.2 mmHg; in patients with heart failure (NYHA class II/III) and normal ejection fraction: 4.3 – 9.4 mmHg [Kasner, 2007]. LV end-diastolic pressure in patients with heart failure (NYHA class II/III) and normal ejection fraction: 12.0 – 18.9 mmHg [Kasner, 2007]. The same pressure in 313 patients without coronary artery disease, but with the possible hypertension (37.1% of patients) or diabetes mellitus (8.3%): $9.58 \pm 5.78$ mmHg [Du]. Evaluation in untreated hypertensive patients with LVH – $15 \pm 5$ mmHg, and without it – $15 \pm 3$ mmHg [Antony]. |
| 34 | LV systolic pressure,<br>$P_{HL\_S}$                                                                 | 100 – 140   | CHF<br>100 – 154<br>Hypertension<br>100 – 186<br>LVH<br>100 – 200                                                   | mmHg | Normal: 100 – 140 mmHg [Pagani]. Peak value in patients with diastolic heart dysfunction (concentric LVH) due to essential hypertension: $162.46 \pm 8.21$ mmHg [Stefanadis]. Evaluation in untreated hypertensive patients with LVH – $184 \pm 16$ mmHg, and without it – $172 \pm 14$ mmHg [Antony]. LV end-systolic pressure in patients with heart failure (NYHA class II/III) and normal ejection fraction: 116 – 154 mmHg [Kasner, 2007].                                                                                                                                                                                                                                                                        |
| 35 | RV diastolic pressure,<br>$P_{HR\_D}$                                                                | 2.0 – 8.0   | Hypertension<br>0.0 – 10.0<br>CHF<br>0.0 – 12.0<br>PH<br>8.0 – 22.0                                                 | mmHg | Normal: 2 – 8 mmHg [Pagani]. Evaluation of RV end-diastolic pressure in patients with uncomplicated, asymptomatic essential hypertension: 1.0 – 10.0 mmHg [Ferlinz]. Patients with isolated LVDD and NYHA class II/III: $6.0 \pm 6.0$ mmHg [Kasner, 2012]. Patients with PH: $15.0 \pm 7.0$ mmHg [Gan].                                                                                                                                                                                                                                                                                                                                                                                                                |
| 36 | RV systolic pressure,<br>$P_{HR\_S}$                                                                 | 15.0 – 30.0 | CHF, class I/II<br>15.0 – 40.0<br>CHF, class III/IV<br>20.0 – 40.0<br>PH<br>62.0 – 110.0                            | mmHg | Normal: 15.0 – 30.0 mmHg [Pagani]. Patients with isolated LVDD and NYHA class II/III: $30.0 \pm 10.0$ mmHg [Kasner, 2012]. Patients with PH: $86.0 \pm 24.0$ mmHg [Gan].                                                                                                                                                                                                                                                                                                                                                                                                                                                                                                                                               |
| 37 | Systolic blood pressure,<br>$P_S$                                                                    | < 140       | Hypertension<br>> 140                                                                                               | mmHg | Definitions of hypertension based on the 2013 European Society of Hypertension and European Society of Cardiology guidelines [Oparil].                                                                                                                                                                                                                                                                                                                                                                                                                                                                                                                                                                                 |
| 38 | Systemic venous pressure (central venous pressure, approximation of right atrial pressure), $P_{VL}$ | 2.0 – 8.0   | Hypertension<br>1.0 – 10.0<br>CHF<br>1.0 – 12.0<br>PH<br>5.0 – 20.0                                                 | mmHg | Normal: 2 – 8 mmHg [Klingensmith]. Mean value in patients with uncomplicated, asymptomatic essential hypertension: 1.0 – 10.0 mmHg [Ferlinz]. Patients with PH: $10.0 \pm 5.0$ mmHg [Gan]. Patients with acute decompensated heart failure: 6.0 – 18.0 mmHg [Sperry]. Patients with heart failure: $6.4 \pm 5.7$ mmHg in low $PVR$ ( $<200$ dyn·s·cm <sup>-5</sup> ), $8.7 \pm 3.7$ mmHg in high $PVR$ [Melenovsky]. Patients with primary PH and NYHA class III: $13.0 \pm 7.0$ mmHg [Opitz]. Patients with normal LV ejection fraction and exertional dyspnea: 3.0 – 16.0 [Nagueh].                                                                                                                                  |

|    |                                                                            |                                     |                                                                 |                                                      |                                                                                                                                                                                                                                                                                                                                                                                                                                                                                                                                                                 |
|----|----------------------------------------------------------------------------|-------------------------------------|-----------------------------------------------------------------|------------------------------------------------------|-----------------------------------------------------------------------------------------------------------------------------------------------------------------------------------------------------------------------------------------------------------------------------------------------------------------------------------------------------------------------------------------------------------------------------------------------------------------------------------------------------------------------------------------------------------------|
| 39 | Pulmonary venous pressure, $P_{VR}$                                        | 3.0 – 20.0                          | –                                                               | mmHg                                                 | The normal range is given in Table A4.                                                                                                                                                                                                                                                                                                                                                                                                                                                                                                                          |
| 40 | Plasma renin activity, $PRA$                                               | 15.0 – 31.7                         | Hypertension<br>12.0 – 38.0                                     | $\text{fmol}\cdot\text{ml}^{-1}\cdot\text{min}^{-1}$ | The normal range is 0.9 – 1.9 pmol/ml/h [Valabhji]. In the case of hypertensive patients, we extended the bounds by 20%.                                                                                                                                                                                                                                                                                                                                                                                                                                        |
| 41 | Plasma renin concentration, $PRC$                                          | 3.42 – 69.4                         | –                                                               | $\text{pg}\cdot\text{ml}^{-1}$                       | The normal range [Perschel].                                                                                                                                                                                                                                                                                                                                                                                                                                                                                                                                    |
| 42 | Resistance of afferent vessels (arteries and arterioles), $R_{a\_dyne}$    | 753 – 6863                          | Hypertension<br>3000 – 25000                                    | $\text{dyn}\cdot\text{s}\cdot\text{cm}^{-5}$         | The normal estimates: 753 – 2532 $\text{dyn}\cdot\text{s}\cdot\text{cm}^{-5}$ (Appendix B), $4629.3 \pm 2233.2$ $\text{dyn}\cdot\text{s}\cdot\text{cm}^{-5}$ [Tsuda]. In patients with essential hypertension, $R_{a\_dyne}$ is, on average, five times higher than in normotensive subjects [Gómez].                                                                                                                                                                                                                                                           |
| 43 | Resistance of efferent arterioles, $R_{e\_dyne}$                           | 1350 – 3400                         | –                                                               | $\text{dyn}\cdot\text{s}\cdot\text{cm}^{-5}$         | Evaluation in healthy individuals (1669 – 2843 $\text{dyn}\cdot\text{s}\cdot\text{cm}^{-5}$ ) is given in Appendix B. In addition, we considered a deviation from this range by 20%.                                                                                                                                                                                                                                                                                                                                                                            |
| 44 | Resistance of interlobar, arcuate and interlobular arteries, $R_{preglom}$ | 7.0 – 20.0                          | Hypertension<br>7.0 – 28.0                                      | $\text{mmHg}\cdot\text{min}\cdot\text{l}^{-1}$       | The range is given in Table C1 for the parameter $R_{preglom_0}$ .                                                                                                                                                                                                                                                                                                                                                                                                                                                                                              |
| 45 | Renal blood flow, $RBF$                                                    | 0.623 – 1.730                       | CHF<br>0.304 – 1.730                                            | $\text{l}\cdot\text{min}^{-1}$                       | The normal range is provided in the work [Bax]. Patients with CHF: $465 \pm 161$ ml/min/1.73 m <sup>2</sup> [Smilde].                                                                                                                                                                                                                                                                                                                                                                                                                                           |
| 46 | Renal vascular resistance, $RVR$                                           | 55.0 – 84.0                         | Hypertension<br>55.0 – 190.0<br>CHF<br>55.0 – 230.0             | $\text{mmHg}\cdot\text{min}\cdot\text{l}^{-1}$       | Evaluation in healthy individuals is derived in Appendix B. In patients with essential hypertension, the $RVR$ value can rise to 190 $\text{mmHg}\cdot\text{min}\cdot\text{l}^{-1}$ [Bauer]. Patients with CHF: 150 – 230 $\text{mmHg}\cdot\text{min}\cdot\text{l}^{-1}$ [Smilde].                                                                                                                                                                                                                                                                              |
| 47 | Total blood volume, $V$                                                    | $0.9\cdot N_{BV} - 1.1\cdot N_{BV}$ | CHF, class<br>III/IV: $0.9\cdot N_{BV} - 1.4\cdot N_{BV}$       | ml                                                   | As the normal range of $V$ , we considered $N_{BV} \pm 10\%$ , where $N_{BV}$ is the estimation calculated by the Nadler equation [Nadler]. In patients with NYHA classes III-IV, the value of $V$ can exceed the expected normal volume by an average 40% [Miller].                                                                                                                                                                                                                                                                                            |
| 48 | LV end-diastolic volume, $V_{HL\_KD}$                                      | M: 67 – 155<br>W: 56 – 104          | CHF, class I/II<br>56 – 353<br>CHF, class<br>III/IV<br>93 – 621 | ml                                                   | The normal range is given in [Lang]. Patients with PH and NYHA class I-III: $86 \pm 30$ ml [Finsberg]. Patients with congestive heart failure due to nonischemic dilated cardiomyopathy (NYHA II/III): $312 \pm 41$ ml [Tkacova]. Patients with advanced heart failure (NYHA class III/IV) caused by idiopathic dilated cardiomyopathy (IDC) or ischemic cardiomyopathy (IsC) and a prolonged QRS complex: 93 – 423 ml [Stellbrink]. Patients with congestive heart failure (NYHA I-IV, mainly III) and IDC: $521 \pm 100$ ml, or IsC: $309 \pm 34$ ml [Mehta]. |
| 49 | LV end-systolic volume, $V_{HL\_KS}$                                       | M: 22 – 58<br>W: 19 – 49            | CHF, class I-II<br>16 – 281<br>CHF, class<br>III/IV<br>70 – 526 | ml                                                   | The normal range [Lang]. Patients with PH and NYHA class I-III: $37 \pm 21$ ml [Finsberg]. Patients with congestive heart failure due to nonischemic dilated cardiomyopathy (NYHA II/III): $246 \pm 35$ ml [Tkacova]. Patients with advanced heart failure (NYHA class III/IV) caused by IDC or IsC and a prolonged QRS complex: 70 – 396 ml [Stellbrink]. Patients with congestive heart failure (NYHA I-IV, mainly III) and IDC: $430 \pm 96$ ml, or IsC: $236 \pm 29$ ml [Mehta].                                                                            |

|    |                                                                         |                             |                                                                                                              |                             |                                                                                                                                                                                                                                                                                                                                                                                                                                                                                                                                                                                                                                                                                                                                                                                                                                                                                                                                                                                                                                                                                                                                                                                                         |
|----|-------------------------------------------------------------------------|-----------------------------|--------------------------------------------------------------------------------------------------------------|-----------------------------|---------------------------------------------------------------------------------------------------------------------------------------------------------------------------------------------------------------------------------------------------------------------------------------------------------------------------------------------------------------------------------------------------------------------------------------------------------------------------------------------------------------------------------------------------------------------------------------------------------------------------------------------------------------------------------------------------------------------------------------------------------------------------------------------------------------------------------------------------------------------------------------------------------------------------------------------------------------------------------------------------------------------------------------------------------------------------------------------------------------------------------------------------------------------------------------------------------|
| 50 | RV end-diastolic volume,<br>$V_{HR\_KD}$                                | M: 124 – 256<br>W: 78 – 218 | CHF, class I-II<br>62 – 256<br>CHF, class<br>III/IV<br>93 – 604                                              | ml                          | The normal range is given in [Hudsmith]. Patients with PH and NYHA class I-III: $134 \pm 72$ ml [Finsberg]. Patients with congestive heart failure (NYHA I-IV, mainly III) and IDC: $527 \pm 77$ ml, or IsC: $490 \pm 54$ ml [Mehta].                                                                                                                                                                                                                                                                                                                                                                                                                                                                                                                                                                                                                                                                                                                                                                                                                                                                                                                                                                   |
| 51 | RV end-systolic volume,<br>$V_{HR\_KS}$                                 | M: 38 – 118<br>W: 20 – 92   | CHF, class I-II<br>23 – 159<br>CHF, class<br>III/IV<br>70 – 478                                              | ml                          | The normal range is given in [Hudsmith]. Patients with PH and NYHA class I-III: $91 \pm 68$ ml [Finsberg]. Patients with congestive heart failure (NYHA I-IV, mainly III) and IDC: $400 \pm 78$ ml, or IsC: $370 \pm 44$ ml [Mehta].                                                                                                                                                                                                                                                                                                                                                                                                                                                                                                                                                                                                                                                                                                                                                                                                                                                                                                                                                                    |
| 52 | Venous oxygen content,<br>$VO_2$                                        | 0.0855 –<br>0.1848          | –                                                                                                            | –                           | The normal range can be found in [Hattori]. We considered additional deviation from this range by 10%.                                                                                                                                                                                                                                                                                                                                                                                                                                                                                                                                                                                                                                                                                                                                                                                                                                                                                                                                                                                                                                                                                                  |
| 53 | Systemic vascular<br>resistance,<br>$1/Y_{HLAL}+1/Y_{ALVL}+1/Y_{VLHR}$  | 0.5271 –<br>1.2048          | Hypertension<br>0.5271 – 1.9608<br>CHF<br>0.5271 – 2.8366<br>LVH<br>0.5271 – 1.5493<br>PH<br>0.6416 – 2.3991 | s·mmHg·<br>ml <sup>-1</sup> | Normal: $0.5271 – 1.2048$ s·mmHg·ml <sup>-1</sup> [Klingensmith] (using the conversion factor 1/1328 from dyn·s·cm <sup>-5</sup> to s·mmHg·ml <sup>-1</sup> [Gómez]). Hypertensive elderly patients: $1.6762 \pm 0.2846$ s·mmHg·ml <sup>-1</sup> [Prys-Roberts]. Patients with diastolic heart dysfunction (concentric LVH) due to essential hypertension: $1.3946 \pm 0.1547$ s·mmHg·ml <sup>-1</sup> [Stefanadis]. Patients with congestive heart failure: $0.7108 – 1.6634$ s·mmHg·ml <sup>-1</sup> [Laskey, 1990], $1.710 – 2.352$ s·mmHg·ml <sup>-1</sup> [Sobol]. Patients with primary PH and NYHA class III: $1.7515 \pm 0.6476$ s·mmHg·ml <sup>-1</sup> [Opitz]. Hypertensive patients with congestive heart failure: $1.434 – 3.774$ s·mmHg·ml <sup>-1</sup> [Sobol]. Patients with heart failure: $1.2116 \pm 0.3780$ s·mmHg·ml <sup>-1</sup> in low PVR (<200 dyn·s·cm <sup>-5</sup> ), $1.3178 \pm 0.4164$ s·mmHg·ml <sup>-1</sup> in high PVR [Melenovsky]. Patients with PH with below threshold PVR: $0.6416 – 0.9337$ s·mmHg·ml <sup>-1</sup> [Ratwatte]. Healthy subjects and patients with miscellaneous cardiac diseases: $0.7410 – 2.8366$ s·mmHg·ml <sup>-1</sup> [Chemla, 2017]. |
| 54 | Pulmonary vascular<br>resistance,<br>$1/Y_{HRAR}+1/Y_{ARVR}+1/Y_{VRHL}$ | 0.0151 –<br>0.1353          | LVH<br>0.0151 – 0.3080<br>PH<br>0.1320 – 1.2071                                                              | s·mmHg·<br>ml <sup>-1</sup> | Normal: $0.0151 – 0.0979$ s·mmHg·ml <sup>-1</sup> [Klingensmith] (using the conversion factor 1/1328 from dyn·s·cm <sup>-5</sup> to s·mmHg·ml <sup>-1</sup> [Gómez]). Evaluation in 10 healthy subjects [Stefanadis]: $0.0989 \pm 0.0364$ s·mmHg·ml <sup>-1</sup> . Patients with diastolic heart dysfunction (concentric LVH) due to essential hypertension: $0.2497 \pm 0.0583$ s·mmHg·ml <sup>-1</sup> [Stefanadis]. Patients with heart failure: $0.0828 – 0.1288$ s·mmHg·ml <sup>-1</sup> in low PVR (<200 dyn·s·cm <sup>-5</sup> ), $0.2229 – 0.4571$ s·mmHg·ml <sup>-1</sup> in high PVR [Melenovsky]. Patients with PH: $0.7523 \pm 0.4548$ s·mmHg·ml <sup>-1</sup> [Gan]. Patients with PH and left heart disease: $0.1320 – 0.6300$ s·mmHg·ml <sup>-1</sup> [Wright, 2017] (using the conversion 1WU = min·mmHg·l <sup>-1</sup> [Kwan]).                                                                                                                                                                                                                                                                                                                                                      |
| 55 | Fractional proximal<br>sodium reabsorption,<br>$\eta_{pt\_sodreab}$     | 0.67 – 0.97                 | –                                                                                                            | –                           | The normal range is given in Table C1 for the parameter $n_{n\_pt}$ . Estimations in elderly hypertensive: $0.86 \pm 0.07$ , and elderly with heart failure: $0.87 \pm 0.0$ [Fliser].                                                                                                                                                                                                                                                                                                                                                                                                                                                                                                                                                                                                                                                                                                                                                                                                                                                                                                                                                                                                                   |

|    |                                                                                                                                                                                     |                   |   |                           |                                                                                                                                                                                                                                        |
|----|-------------------------------------------------------------------------------------------------------------------------------------------------------------------------------------|-------------------|---|---------------------------|----------------------------------------------------------------------------------------------------------------------------------------------------------------------------------------------------------------------------------------|
| 56 | Fractional sodium reabsorption in the distal tubule and subsequent parts of the nephron,<br>$\eta_{dt\_sodreab} + \eta_{cd\_sodreab} - \eta_{dt\_sodreab} \cdot \eta_{cd\_sodreab}$ | 0.78 – 0.98       | – | –                         | The normal range is given for the expression $n_{\epsilon\_dt} + n_{n\_cd} - n_{n\_cd} \cdot n_{\epsilon\_dt}$ above. Estimations in elderly hypertensive: $0.93 \pm 0.05$ , and elderly with heart failure: $0.89 \pm 0.07$ [Fliser]. |
| 57 | Water intake, $\Phi_{win}$                                                                                                                                                          | 0.00096 – 0.00312 | – | $l \cdot \text{min}^{-1}$ | The average statistical range estimate is $0.0019 \pm 0.0007 l \cdot \text{min}^{-1}$ [Malisova]. We assumed a possible deviation from this range by 20%.                                                                              |

## REFERENCES

- Admiraal PJ, Danser AH, Jong MS, Pieterman H, Derkx FH, Schalekamp MA (1993) Regional angiotensin II production in essential hypertension and renal artery stenosis. *Hypertension* 21:173–184.
- Andrushkevich VV (2006) Blood biochemical parameters, their reference values, reasons for level change in serum. Novosibirsk. 28 p. (In Russ.)
- Antony I, Nitenberg A, Foulst JM, Aptekar E (1993) Coronary vasodilator reserve in untreated and treated hypertensive patients with and without left ventricular hypertrophy. *Journal of the American College of Cardiology* 22(2):514–520.
- Amberg GC, Bonev AD, Rossow CF, Nelson MT, Santana LF (2003) Modulation of the molecular composition of large conductance, Ca(2+) activated K(+) channels in vascular smooth muscle during hypertension. *The Journal of Clinical Investigation* 112(5):717–724.
- Ardaillou R, Chansel D, Chatziantoniou C, Dussaule JC (1999) Mesangial AT1 receptors: expression, signaling, and regulation. *Journal of the American Society of Nephrology Suppl* 11:S40–S46.
- Bastos MB, Burkhoff D, Maly J, Daemen J, den Uil CA, Ameloot K, Lenzen M, Mahfoud F, Zijlstra F, Schreuder JJ, Van Mieghem NM (2020) Invasive left ventricle pressure-volume analysis: overview and practical clinical implications. *European Heart Journal* 41:1286–1297.
- Bauer JH, Brooks CS, Burch RN (1982) Renal function and hemodynamic studies in low- and normal-renin essential hypertension. *Archives of Internal Medicine* 142:1317–1323.
- Bax L, Bakker CJG, Klein WM, Blanken N, Beutler JJ, Mali WPTRM (2005) Renal blood flow measurements with use of phase-contrast magnetic resonance imaging: normal values and reproducibility. *Journal of Vascular and Interventional Radiology* 16:807–814.
- Beasley R, Chien J, Douglas J, Eastlake L, Farah C, King G, Moore R, Pilcher J, Richards M, Smith S, Walters H (2015) Thoracic Society of Australia and New Zealand oxygen guidelines for acute oxygen use in adults: 'Swimming between the flags'. *Respirology* 20:1182–1191.
- Bertram JF, Douglas-Denton RN, Diouf B, Hughson MD, Hoy WE (2011) Human nephron number: implications for health and disease. *Pediatric Nephrology* 26:1529–1533.
- Bhagat CI, Garcia-Webb P, Fletcher E, Beilby JP (1984) Calculated vs measured plasma osmolalities revisited. *Clinical Chemistry* 30(10):1703–1705.
- Bhella PS, Hastings JL, Fujimoto N, Shibata S, Carrick-Ranson G, Palmer MD, Boyd KN, Adams-Huet B, Levine BD (2014) Impact of lifelong exercise "dose" on left ventricular compliance and distensibility. *Journal of the American College of Cardiology* 64(12):1257–1266.
- Billett HH (1990) Hemoglobin and hematocrit. In: *Clinical methods: The history, physical, and laboratory examinations*. 3rd edition. Editors: Walker HK, Hall WD, Hurst JW. Boston: Butterworths.
- Blais C, Pibarot P, Dumesnil JG, Garcia D, Chen D, Durand LG (2001) Comparison of valve resistance with effective orifice area regarding flow dependence. *American Journal of Cardiology* 88:45–52.
- Blantz RC, Konnen KS, Tucker BJ (1976) Angiotensin II effects upon the glomerular microcirculation and ultrafiltration coefficient of the rat. *The Journal of Clinical Investigation* 57:419–434.
- Bochud M, Staessen JA, Maillard M, Mazeko MJ, Kuznetsova T, Woodiwiss A, Richart T, Norton G, Thijs L, Elston R, Burnier M (2009) Ethnic differences in proximal and distal tubular sodium reabsorption are heritable in black and white populations. *Journal of Hypertension* 27:606–612.



- Boer WH, Koomans HA, Dorhout Mees EJ (1987) Lithium clearance during the paradoxical natriuresis of hypotonic expansion in man. *Kidney International* 32:376–381.
- Bojestig M, Nystrom FH, Arnqvist HJ, Ludvigsson J, Karlberg BE (2000) The renin-angiotensin-aldosterone system is suppressed in adults with Type 1 diabetes. *Journal of the Renin-Angiotensin-Aldosterone System* 1:353–356.
- Bollag WB (2014) Regulation of aldosterone synthesis and secretion. *Comprehensive Physiology* 4:1017–1055.
- Boogers MJ, van Werkhoven JM, Schuijf JD, Delgado V, El-Naggar HM, Boersma E, Nucifora G, van der Geest RJ, Paelinck BP, Kroft LJ, Reiber JH, de Roos A, Bax JJ, Lamb HJ (2011) Feasibility of diastolic function assessment with cardiac CT: feasibility study in comparison with tissue Doppler imaging. *JACC: Cardiovascular Imaging* 4(3):246–256.
- Brasch H, Sieroslowski L, Dominiak P (1993) Angiotensin II increases norepinephrine release from atria by acting on angiotensin subtype 1 receptors. *Hypertension* 22:699–704.
- Brooks DE, Goodwin JW, Seaman GV (1970) Interactions among erythrocytes under shear. *Journal of Applied Physiology* 28(2):172–177.
- Brown WJr, Brown FK, Krishan I (1970) Exchangeable sodium and blood volume in normotensive and hypertensive humans on high and low sodium intake. *Circulation* 43:508–519.
- Brown KA, Ditchey RV (1988) Human right ventricular end-systolic pressure–volume relation defined by maximal elastance. *Circulation* 78:81–91.
- Buglioni A, Cannone V, Cataliotti A, Sangaralingham SJ, Heublein DM, Scott CG, Bailey KR, Rodeheffer RJ, Dessì-Fulgheri P, Sarzani R, Burnett JcJr (2015) Circulating aldosterone and natriuretic peptides in the general community: relationship to cardiorenal and metabolic disease. *Hypertension* 65(1):45–53.
- Burkhoff D, Mirsky I, Suga H (2005) Assessment of systolic and diastolic ventricular properties via pressure-volume analysis: a guide for clinical, translational, and basic researchers. *American Journal of Physiology-Heart and Circulatory Physiology* 289:H501–H512.
- Burwash IG, Pearlman AS, Kraft CD, Miyake-Hull C, Healy NL, Otto CM (1994) Flow dependence of measures of aortic stenosis severity during exercise. *Journal of the American College of Cardiology* 24(5):1342–1350.
- Busher JT (1990) Serum albumin and globulin. In: *Clinical methods: The history, physical, and laboratory examinations*. 3rd edition. Editors: Walker HK, Hall WD, Hurst JW. Boston: Butterworths.
- Cachat F, Combescure C, Cauderay M, Girardin E, Chehade H (2015) A systematic review of glomerular hyperfiltration assessment and definition in the medical literature. *Clinical Journal of the American Society of Nephrology* 10:382–389.
- Cain PA, Ahl R, Hedstrom E, Ugander M, Allansdotter-Johnsson A, Friberg P, Arheden H (2009) Age and gender specific normal values of left ventricular mass, volume and function for gradient echo magnetic resonance imaging: a cross sectional study. *BMC Medical Imaging* 9:2.
- Cannone V, Buglioni A, Sangaralingham SJ, Scott C, Bailey KR, Rodeheffer R, Redfield MM, Sarzani R, Burnett Jr JC (2018) Aldosterone, hypertension, and antihypertensive therapy: insights from a general population. *Mayo Clinic Proceedings* 93(8):980–990.
- Cattermole GN, Leung PY, Ho GY, Lau PW, Chan CP, Chan SS, Smith BE, Graham CA, Rainer TH (2017) The normal ranges of cardiovascular parameters measured using the ultrasonic cardiac output monitor. *Physiological Reports* 5(6):e13195.

- Caudron J, Fares J, Bauer F, Dacher JN (2011) Evaluation of left ventricular diastolic function with cardiac MR imaging. *RadioGraphics* 31:239–261.
- Chagnac A, Weinstein T, Korzets A, Ramadan E, Hirsch J, Gafer U (2000) Glomerular hemodynamics in severe obesity. *American Journal of Physiology-Renal Physiology* 278:F817–F822.
- Chaliki HP, Hurrell DG, Nishimura RA, Reinke RA, Appleton CP (2002) Pulmonary venous pressure: relationship to pulmonary artery, pulmonary wedge, and left atrial pressure in normal, lightly sedated dogs. *Catheterization and Cardiovascular Interventions* 56:432–438.
- Chemla D, Hébert JL, Coirault C, Zamani K, Suard I, Colin P, Lecarpentier Y (1998) Total arterial compliance estimated by stroke volume-to-aortic pulse pressure ratio in humans. *American Journal of Physiology* 274:H500–H505.
- Chemla D, Castelain V, Hervé P, Lecarpentier Y, Brimiouille S (2002) Haemodynamic evaluation of pulmonary hypertension. *Eur Respir J* 20: 1314–1331.
- Chemla D, Lau EMT, Hervé P, Millasseau S, Brahimi M, Zhu K, Sattler C, Garcia G, Attal P, Nitenberg A (2017) Influence of critical closing pressure on systemic vascular resistance and total arterial compliance: A clinical invasive study. *Arch Cardiovasc Dis* 110(12):659–666.
- Chen XL, Bayliss DA, Fern RJ, Barrett PQ (1999) A role for T-type  $Ca^{2+}$  channels in the synergistic control of aldosterone production by ANG II and  $K^{+}$ . *American Journal of Physiology* 276:F674–F683.
- Cherney DZ, Perkins BA, Soleymanlou N, Maione M, Lai V, Lee A, Fagan NM, Woerle HJ, Johansen OE, Broedl UC, von Eynatten M (2014) Renal hemodynamic effect of sodium-glucose cotransporter 2 inhibition in patients with type 1 diabetes mellitus. *Circulation* 129:587–597.
- Chumlea WC, Guo SS, Zeller CM, Reo NV, Siervogel RM (1999) Total body water data for white adults 18 to 64 years of age: the Fels Longitudinal Study. *Kidney International* 56:244–252.
- Cléroux J, Kouamé N, Nadeau A, Coulombe D, Lacourcière Y (1992) Aftereffects of exercise on regional and systemic hemodynamics in hypertension. *Hypertension* 19(2):183–191.
- Consigny PM (1991) Vascular smooth muscle contraction and relaxation: pathways and chemical modulation. *Journal of Vascular and Interventional Radiology* 2(3):309–317.
- Cowley AWJr, Cushman WC, Quillen EWJr, Skelton MM, Langford HG (1981) Vasopressin elevation in essential hypertension and increased responsiveness to sodium intake. *Hypertension* 3:I93–I100.
- Daly WJ, Bondurant S (1962) The effects of oxygen breathing on heart rate, blood pressure, and cardiac index of normal men-resting, with reactive hyperaemia, and after atropine. *Journal of Clinical Investigation* 41(1):126–132.
- Damman K, Navis G, Smilde TD, Voors AA, van der Bij W, van Veldhuisen DJ, Hillege HL (2007) Decreased cardiac output, venous congestion and the association with renal impairment in patients with cardiac dysfunction. *European Journal of Heart Failure* 9:872–878.
- Dedov II, Shestakova MV, Mayorov AYu, editors (2017) Algorithms of specialized medical care for diabetes mellitus patients. 8-th Edition. Moscow: UP Print, 112 p. (In Russ.)
- Dehaven JC, Shapiro NZ (1970) Simulation of the renal effects of antidiuretic hormone (ADH) in man. *Journal of Theoretical Biology* 28:261–286.
- Dell'Italia LJ, Walsh RA (1988) Application of a time varying elastance model to right ventricular performance in man. *Cardiovascular Research* 22:864–874.
- Derckx FH, Wenting GJ, Man in't Veld AJ, Verhoeven RP, Schalekamp MA (1978) Control of enzymatically inactive renin in man under various pathological conditions: implications for the

- interpretation of renin measurements in peripheral and renal venous plasma. *Clinical Science and Molecular Medicine* 54:529–538.
- Deurenberg P, Tagliabue A, Schouten FJ (1995) Multi-frequency impedance for the prediction of extracellular water and total body water. *British Journal of Nutrition* 73:349–358.
- Digne-Malcolm H, Frise MC, Dorrington KL (2016) How do antihypertensive drugs work? Insights from studies of the renal regulation of arterial blood pressure. *Frontiers in Physiology* 7:320.
- Dijkhuizen P, Buursma A, Fongers TM, Gerding AM, Oeseburg B, Zijlstra WG (1977) The oxygen binding capacity of human haemoglobin. Hüfner's factor redetermined. *Pflügers Archiv* 369:223–231.
- Doenya-Barak K, de Abreu MHFG, Borges LE, Tavares Filho HA, Yunlin F, Yurong Z, Levin NW, Kaufman AM, Efrati S, Pereg D, Litovchik I, Fuchs S, Minha S (2019) Non-invasive hemodynamic profiling of patients undergoing hemodialysis – a multicenter observational cohort study. *BMC Nephrology* 20:347.
- Donato L, Coli A, Pasqualini R, Duce T (1972) Metabolic clearance rate of radioiodinated angiotensin II in normal men. *American Journal of Physiology* 223(5):1250–1256.
- Dorwart WV, Chalmers L (1975) Comparison of methods for calculating serum osmolality from chemical concentrations, and the prognostic value of such calculations. *Clinical Chemistry* 21(2):190–194.
- Dou Y, Zhu F, Kotanko P (2012) Assessment of extracellular fluid volume and fluid status in hemodialysis patients: current status and technical advances. *Seminars in Dialysis* 25(4):377–387.
- Du LJ, Dong PS, Jia JJ, Fan XM, Yang XM, Wang SX, Yang XS, Li ZJ, Wang HL (2015) Association between left ventricular end-diastolic pressure and coronary artery disease as well as its extent and severity. *International Journal of Clinical and Experimental Medicine* 8(10):18673–18680.
- Dushina AG, Lopina EA, Libis RA (2019) Features of chronic heart failure depending on the left ventricular ejection fraction. *Russian Journal of Cardiology* 24(Additional issue):5–9.
- Edelman IS, Leibman J, O'meara MP, Birkenfeld LW (1958) Interrelations between serum sodium concentration, serum osmolarity and total exchangeable sodium, total exchangeable potassium and total body water. *Journal of Clinical Investigation* 37(9):1236–1256.
- Farber SJ, Soberman RJ (1956) Total body water and total exchangeable sodium in edematous states due to cardiac, renal or hepatic disease. *Journal of Clinical Investigation* 35(7):779–791.
- Faucon AL, Flamant M, Metzger M, Boffa JJ, Haymann JP, Houillier P, Thervet E, Vrtovsni F, Stengel B, Geri G, Vidal-Petiot E, et al. (2019) Extracellular fluid volume is associated with incident end-stage kidney disease and mortality in patients with chronic kidney disease. *Kidney International* 96:1020–1029.
- Feldschuh J, Enson Y (1977) Prediction of the normal blood volume. Relation of blood volume to body habitus. *Circulation* 56(4):605–612.
- Ferlinz J (1980) Right ventricular performance in essential hypertension. *Circulation* 61(1):156–162.
- Ferrario CM, Martell N, Yunis C, Flack JM, Chappell MC, Brosnihan KB, Dean RH, Fernandez A, Novikov SV, Pinillas C, Luque M (1998) Characterization of angiotensin-(1-7) in the urine of normal and essential hypertensive subjects. *American Journal of Hypertension* 11:137–146.
- Finsberg H, Xi C, Zhao X, Tan JL, Genet M, Sundnes J, Lee LC, Zhong L, Wall ST (2019) Computational quantification of patient-specific changes in ventricular dynamics associated with pulmonary hypertension. *Am J Physiol Heart Circ Physiol* 317:H1363–H1375.

- Fischbach FT (2003) *Manual of laboratory and diagnostic test*, 7th ed. Philadelphia: Lippincott Williams and Wilkins.
- Fliser D, Franek E, Joest M, Block S, Mutschler E, Ritz E (1997) Renal function in the elderly: impact of hypertension and cardiac function. *Kidney Int* 51:1196–1204.
- Fogarty J, Loughrey C (2016) Hyponatraemia in hospitalised adults: a guide for the junior doctor. *The Ulster Medical Journal* 86(2):84–89.
- Fujimoto N, Hastings JL, Bhella PS, Shibata S, Gandhi NK, Carrick-Ranson G, Palmer D, Levine BD (2012) Effect of ageing on left ventricular compliance and distensibility in healthy sedentary humans. *The Journal of Physiology* 590.8:1871–1880.
- Furukawa K, Abumiya T, Sakai K, Hirano M, Osanai T, Shichinohe H, Nakayama N, Kazumata K, Aida T, Houkin K (2016) Measurement of human blood viscosity by an electromagnetic spinning sphere viscometer. *Journal of Medical Engineering and Technology* 40(6):285–292.
- Gan C, Lankhaar JW, Marcus JT, Westerhof N, Marques KM, Bronzwaer JG, Boonstra A, Postmus PE, Vonk-Noordegraaf A (2006) Impaired left ventricular filling due to right-to-left ventricular interaction in patients with pulmonary arterial hypertension. *American Journal of Physiology-Heart and Circulatory Physiology* 290:H1528–H1533.
- Gardner MD, Scott R (1980) Age- and sex-related reference ranges for eight plasma constituents derived from randomly selected adults in a Scottish new town. *Journal of Clinical Pathology* 33:380–385.
- Gazioglu K, Yu PN (1967) Pulmonary blood volume and pulmonary capillary blood volume in valvular heart disease. *Circulation* 35:701–709.
- Gibson JG, Evans WA (1937) Clinical studies of the blood volume. II. The relation of plasma and total blood volume to venous pressure, blood velocity rate, physical measurements, age and sex in NINETY normal humans. *The journal of clinical investigation* 16(3):317–328.
- Glinicki P, Jeske W, Bednarek-Papierska L, Kruszyńska A, Gietka-Czernel M, Rosłonowska E, Słowińska-Szrednicka J, Kasperlik-Zaluska A, Zgliczyński W (2015) The ratios of aldosterone/plasma renin activity (ARR) versus aldosterone/direct renin concentration (ADRR). *Journal of the Renin-Angiotensin-Aldosterone System* 16(4):1298–1305.
- Glossmann H, Baukal AJ, Catt KJ (1974) Properties of angiotensin II receptors in the bovine and rat adrenal cortex. *The Journal of Biological Chemistry* 249(3):825–834.
- Goldberg S, Ollila HM, Lin L, Sharifi H, Rico T, Andlauer O, Aran A, Bloomrosen E, Faraco J, Fang H, Mignot E (2017) Analysis of hypoxic and hypercapnic ventilatory response in healthy volunteers. *PLoS One* 12(1):e0168930.
- Gómez DM (1951) Evaluation of renal resistances, with special reference to changes in essential hypertension. *The Journal of Clinical Investigation* 30(10):1143–1155.
- Guasch A, Cua M, You W, Mitch WE (1997) Sick cell anemia causes a distinct pattern of glomerular dysfunction. *Kidney International* 51:826–833.
- Guberina H, Baumann M, Bruck H, Feldkamp T, Nürnberger J, Kribben A, Philipp T, Witzke O, Sotiropoulos G, Mitchell A (2013) Associations of smoking with alterations in renal hemodynamics may depend on sex--investigations in potential kidney donors. *Kidney Blood Press Res* 37:611–621.
- Guyton AC, Coleman TG, Granger HJ (1972) Circulation: overall regulation. *Annual Review of Physiology* 34:13–46.
- Hall JE (2011) *Guyton and Hall textbook of medical physiology*. Twelfth edition. Philadelphia: Saunders Elsevier, 1091 p.

- Hallow KM, Lo A, Beh J, Rodrigo M, Ermakov S, Friedman S, de Leon H, Sarkar A, Xiong Y, Sarangapani R, Schmidt H, Webb R, Kondic AG (2014) A model-based approach to investigating the pathophysiological mechanisms of hypertension and response to antihypertensive therapies: extending the Guyton model. *American Journal of Physiology. Regulatory, Integrative and Comparative Physiology* 306(9):R647–R662.
- Hallow KM, Gebremichael Y (2017a) A quantitative systems physiology model of renal function and blood pressure regulation: model description. *CPT: Pharmacometrics and Systems Pharmacology* 6:383–392.
- Hallow KM, Gebremichael Y (2017b) A quantitative systems physiology model of renal function and blood pressure regulation: application in salt-sensitive hypertension. *CPT: Pharmacometrics and Systems Pharmacology* 6:393–400.
- Haluska BA, Jeffriess L, Brown J, Carlier S, Marwick TH (2010) A comparison of methods for assessing total arterial compliance. *Journal of Human Hypertension* 24:254–256.
- Hammer M, Ladefoged J, Olgaard K (1980) Relationship between plasma osmolality and plasma vasopressin in human subjects. *American journal of physiology* 238:E313–E317.
- Hannedouche TP, Delgado AG, Gnionsahe DA, Boitard C, Lacour B, Grünfeld JP (1990) Renal hemodynamics and segmental tubular reabsorption in early type 1 diabetes. *Kidney International* 37:1126–1133.
- Hattori N, Bergsneider M, Wu HM, Glenn TC, Vespa PM, Hovda DA, Phelps ME, Huang SC (2004) Accuracy of a method using short inhalation of (15)O-O(2) for measuring cerebral oxygen extraction fraction with PET in healthy humans. *Journal of Nuclear Medicine* 45:765–770.
- Hayward CS, Kalnins WV, Rogers P, Feneley MP, MacDonald PS, Kelly RP (1997) Effect of inhaled nitric oxide on normal human left ventricular function. *Journal of the American College of Cardiology* 30(1):49–56.
- Henry CJ (2005) Basal metabolic rate studies in humans: measurement and development of new equations. *Public Health Nutrition* 8(7A):1133–1152.
- Hermann K, von Eschenbach CE, von Tschirschnitz M, Ring J (1993) Plasma concentrations of arginine vasopressin, oxytocin and angiotensin in patients with hymenoptera venom anaphylaxis. *Regulatory Peptides* 49:1–7.
- Hill GS, Heudes D, Jacquot C, Gauthier E, Bariéty J (2006) Morphometric evidence for impairment of renal autoregulation in advanced essential hypertension. *Kidney International* 69:823–831.
- Hoang K, Tan JC, Derby G, Blouch KL, Masek M, Ma I, Lemley KV, Myers BD (2003) Determinants of glomerular hypofiltration in aging humans. *Kidney International* 64:1417–1424.
- Hoffer EC, Meador CK, Simpson DC (1969) Correlation of whole-body impedance with total body water volume. *Journal of Applied Physiology* 27(4):531–534.
- Holloway CJ, Montgomery HE, Murray AJ, Cochlin LE, Codreanu I, Hopwood N, Johnson AW, Rider OJ, Levett DZ, Tyler DJ, Francis JM, Neubauer S, Grocott MP, Clarke K (2010) Cardiac response to hypobaric hypoxia: persistent changes in cardiac mass, function, and energy metabolism after a trek to Mt. Everest Base Camp. *The FASEB Journal* 25:792–796.
- Hosten AO (1990) BUN and Creatinine. In: *Clinical methods: The history, physical, and laboratory examinations*. 3rd edition. Editors: Walker HK, Hall WD, Hurst JW. Boston: Butterworths.
- Hoy WE, Hughson MD, Singh GR, Douglas-Denton R, Bertram JF (2006) Reduced nephron number and glomerulomegaly in Australian Aborigines: a group at high risk for renal disease and hypertension. *Kidney International* 70:104–110.

- Hudsmith LE, Petersen SE, Francis JM, Robson MD, Neubauer S (2005) Normal human left and right ventricular and left atrial dimensions using steady state free precession magnetic resonance imaging. *Journal of Cardiovascular Magnetic Resonance* 7:775–782.
- Hughes AD (1998) Molecular and cellular mechanisms of action of angiotensin II (AT1) receptors in vascular smooth muscle. *Journal of Human Hypertension* 12:275–281.
- Hund SJ, Kameneva MV, Antaki JF (2017) A quasi-mechanistic mathematical representation for blood viscosity. *Fluids* 2(1):10.
- Inada Y, Ojima M, Kanagawa R, Misumi Y, Nishikawa K, Naka T (1999) Pharmacologic properties of candesartan cilexetil – possible mechanisms of long-acting antihypertensive action. *Journal of Human Hypertension* 13(Suppl. 1):S75–S80.
- Ishimitsu T, Nishikimi T, Matsuoka H, Kangawa K, Kitamura K, Minami J, Matsuo H, Eto T (1996) Behaviour of adrenomedullin during acute and chronic salt loading in normotensive and hypertensive subjects. *Clinical Science* 91:293–298.
- Jin Y, Kuznetsova T, Maillard M, Richart T, Thijs L, Bochud M, Herregods M-C, Burnier M, Fagard R, Staessen JA (2009) Independent relations of left ventricular structure with the 24-hour urinary excretion of sodium and aldosterone. *Hypertension* 54:489–495.
- Johnson NP, Zelis JM, Tonino PAL, Houthuizen P, Bouwman RA, Brueren GRG, Johnson DT, Koolen JJ, Korsten HHM, Wijnbergen IF, Zimmermann FM, Kirkeeide RL, Pijls NHJ, Gould KL (2018) Pressure gradient vs. flow relationships to characterize the physiology of a severely stenotic aortic valve before and after transcatheter valve implantation. *European Heart Journal* 39(28):2646–2655.
- Juretzko A, Steinbach A, Hannemann A, Endlich K, Endlich N, Friedrich N, Lendeckel U, Stracke S, Rettig R (2017) Urinary angiotensinogen and renin excretion are associated with chronic kidney disease. *Kidney and Blood Pressure Research* 42:145–155.
- Karaaslan F, Denizhan Y, Kayserilioglu A, Ozcan Gulcur H (2005) Long-term mathematical model involving renal sympathetic nerve activity, arterial pressure, and sodium excretion. *Annals of Biomedical Engineering* 33(11):1607–1630.
- Karaaslan F, Denizhan Y, Hester R (2014) A mathematical model of long-term renal sympathetic nerve activity inhibition during an increase in sodium intake. *American Journal of Physiology-Regulatory Integrative and Comparative Physiology* 306:R234–R247.
- Kasner M, Westermann D, Steendijk P, Dröse S, Poller W, Schultheiss HP, Tschöpe C (2012) Left ventricular dysfunction induced by nonsevere idiopathic pulmonary arterial hypertension: a pressure-volume relationship study. *American Journal of Respiratory and Critical Care Medicine* 186(2):181–189.
- Kasner M, Westermann D, Steendijk P, Gaub R, Wilkeshoff U, Weitmann K, Hoffmann W, Poller W, Schultheiss H-P, Pauschinger M, Tschöpe C (2007) Utility of Doppler echocardiography and tissue Doppler imaging in the estimation of diastolic function in heart failure with normal ejection fraction: a comparative Doppler-conductance catheterization study. *Circulation* 116(6):637–647.
- Kass DA, Midei M, Graves W, Brinker JA, Maughan WL (1988) Use of a conductance (volume) catheter and transient inferior vena caval occlusion for rapid determination of pressure-volume relationships in man. *Catheterization and Cardiovascular Diagnosis* 15:192–202.
- Kato M, Kinugawa T, Omodani H, Osaki S, Ogino K, Hisatome I, Miyakoda H, Fujimoto Y (1996) Augmented response in plasma atrial natriuretic peptide to dynamic exercise in patients with congestive heart failure. *Japanese Circulation Journal* 60:909–916.
- Kawaji K, Codella NCF, Prince MR, Chu CW, Shakoor A, LaBounty TM, Min JK, Swaminathan RV, Devereux RB, Wang Y, Weinsaft JW (2009) Automated segmentation of routine clinical

- cardiac magnetic resonance imaging for assessment of left ventricular diastolic dysfunction. *Circulation: Cardiovascular Imaging* 2:476–484.
- Keatinge WR, Coleshaw SR, Easton JC, Cotter F, Mattock MB, Chelliah R (1986) Increased platelet and red cell counts, blood viscosity, and plasma cholesterol levels during heat stress, and mortality from coronary and cerebral thrombosis. *The American Journal of Medicine* 81:795–800.
- Kelly RP, Ting CT, Yang TM, Liu CP, Maughan WL, Chang MS, Kass DA (1992) Effective arterial elastance as index of arterial vascular load in humans. *Circulation* 86:513–521.
- Klingensmith ME, Vemuri C, Fayanju OM, Robertson JO, Samson PP, Sanford DE, editors (2016) *The Washington manual of surgery*. Seventh edition. St. Louis, Missouri: Wolters Kluwer, 984 p.
- Knud H, Olesen MD (1967) Interrelations between total exchangeable sodium, potassium, body water, and serum sodium and potassium concentrations in hyponatremic and normonatremic heart disease. *Circulation* 35:895–903.
- Kofranek J, Rusz J (2010) Restoration of Guyton's diagram for regulation of the circulation as a basis for quantitative physiological model development. *Physiological Research* 59(6):897–908.
- Kojima I, Kojima K, Rasmussen H (1985) Role of calcium fluxes in the sustained phase of angiotensin II-mediated aldosterone secretion from adrenal glomerulosa cells. *Journal of Biological Chemistry* 260(16):9177–9184.
- Kovacs G, Berghold A, Scheidl S, Olschewski H (2009) Pulmonary arterial pressure during rest and exercise in healthy subjects: a systematic review. *European Respiratory Journal* 34:888–894.
- Kroll MH, Hellums JD, McIntire LV, Schafer AI, Moake JL (1996) Platelets and shear stress. *Blood* 88(5):1525–1541.
- Kuiper JJ, Boomsma F, van Buren H, de Man R, Danser AH, van den Meiracker AH (2008) Components of the renin-angiotensin-aldosterone system in plasma and ascites in hepatic cirrhosis. *European Journal of Clinical Investigation* 38(12):939–944.
- Kwan WC, Shavelle DM, Laughrun DR (2019) Pulmonary vascular resistance index: Getting the units right and why it matters. *Clin Cardiol* 42(3):334–338.
- Kyhl K, Ahtarovski KA, Iversen K, Thomsen C, Vejlstrup N, Engstrøm T, Madsen PL (2013) The decrease of cardiac chamber volumes and output during positive-pressure ventilation. *American Journal of Physiology-Heart and Circulatory and Physiology* 305:H1004–H1009.
- Lafayette RA, Malik T, Druzin M, Derby G, Myers BD (1999) The dynamics of glomerular filtration after Caesarean section. *Journal of the American Society of Nephrology* 10:1561–1565.
- Lang RM, Bierig M, Devereux RB, Flachskampf FA, Foster E, Pellikka PA, Picard MH, Roman MJ, Seward J, Shanewise J, Solomon S, Spencer KT, Sutton MStJ, Stewart W (2006) Recommendations for chamber quantification. *European Journal of Echocardiography* 7:79–108.
- Laskey WK, Parker HG, Ferrari VA, Kussmaul WG, Noordergraaf A (1990) Estimation of total systemic arterial compliance in humans. *Journal of Applied Physiology* 69(1):112–119.
- Laskey WK, Kussmaul WG 3rd, Noordergraaf A (2009) Systemic arterial response to exercise in patients with aortic valve stenosis. *Circulation* 119:996–1004.
- Lenz T, Nadansky M, Gossmann J, Oremek G, Geiger H (1998) Exhaustive exercise-induced tissue hypoxia does not change endothelin and big endothelin plasma levels in normal volunteers. *American Journal of Hypertension* 11:1028–1031.
- Letcher RL, Chien S, Pickering TG, Sealey JE, Laragh JH (1981) Direct relationship between blood pressure and blood viscosity in normal and hypertensive subjects. Role of fibrinogen and concentration. *The American Journal of Medicine* 70:1195–1202.

- Levey AS, Becker C, Inker LA (2015) Glomerular filtration rate and albuminuria for detection and staging of acute and chronic kidney disease in adults: a systematic review. *JAMA* 313(8):837–846.
- Levin A, Stevens PE (2013) Summary of KDIGO 2012 CKD Guideline: behind the scenes, need for guidance, and a framework for moving forward. *Kidney International* 85:49–61.
- Levinson GE, Pacifico AD, Frank FM (1996) Studies of cardiopulmonary blood volume. Measurement of total cardiopulmonary blood volume in normal human subjects at rest and during exercise. *Circulation* 33:347–356.
- Ljunggren H (1955) Measurement of total body water with deuterium oxide and antipyrine. *Acta Physiologica* 33(1):69–82.
- Luft FC, Fineberg NS, Sloan RS (1982) Estimating dietary sodium intake in individuals receiving a randomly fluctuating intake. *Hypertension* 4:805–808.
- Macedo R, Prakasa K, Tichnell C, Marcus F, Calkins H, Lima JA, Bluemke DA (2007) Marked lipomatous infiltration of the right ventricle: MRI findings in relation to arrhythmogenic right ventricular dysplasia. *American Journal of Roentgenology* 188(5):W423–W427.
- Maceira AM, Prasad SK, Khan M, Pennell DJ (2006a) Normalized left ventricular systolic and diastolic function by steady state free precession cardiovascular magnetic resonance. *Journal of Cardiovascular Magnetic Resonance* 8:417–426.
- Maceira AM, Prasad SK, Khan M, Pennell DJ (2006b) Reference right ventricular systolic and diastolic function normalized to age, gender and body surface area from steady-state free precession cardiovascular magnetic resonance. *European Heart Journal* 27:2879–2888.
- Magder S (2016) Volume and its relationship to cardiac output and venous return. *Critical Care* 20:271.
- Magness RR, Cox K, Rosenfeld CR, Gant NF (1994) Angiotensin II metabolic clearance rate and pressor responses in nonpregnant and pregnant women. *American Journal of Obstetrics and Gynecology* 171:668–679.
- Malisova O, Athanasatou A, Pepa A, Husemann M, Domnik K, Braun H, Mora-Rodriguez R, Ortega JF, Fernandez-Elias VE, Kapsokefalou M (2016) Water intake and hydration indices in healthy European adults: the European hydration research study (EHRS). *Nutrients* 8:204.
- Marini JJ, Leatherman JW (2005) Pulmonary artery occlusion pressure: measurement, significance, and clinical uses. In: *Functional hemodynamic monitoring. Update in intensive care and emergency medicine* 42. Editors: Pinsky MR, Payen D. Berlin, Heidelberg: Springer.
- Mason JW, Ramseth DJ, Chanter DO, Moon TE, Goodman DB, Mendzelevski B (2007) Electrocardiographic reference ranges derived from 79,743 ambulatory subjects. *Journal of electrocardiology* 40:228–234.
- Mehta S, Liu PP, Fitzgerald FS, Allidina YK, Douglas Bradley T (2000) Effects of continuous positive airway pressure on cardiac volumes in patients with ischemic and dilated cardiomyopathy. *Am J Respir Crit Care Med* 161:128–134.
- Melenovsky V, Al-Hiti H, Kazdova L, Jabor A, Syrovatka P, Malek I, Kettner J, Kautzner J (2009) Transpulmonary B-type natriuretic peptide uptake and cyclic guanosine monophosphate release in heart failure and pulmonary hypertension: the effects of sildenafil. *J Am Coll Cardiol* 54(7):595–600.
- Miller WL, Mullan BP (2014) Understanding the heterogeneity in volume overload and fluid distribution in decompensated heart failure is key to optimal volume management: role for blood volume quantitation. *JACC Heart Fail* 2(3):298–305.



- Moore FD (1946) Determination of total body water and solids with isotopes. *Science* 104(2694):157–160.
- Moore FD (1967) Body composition and its measurement in vivo. *British Journal of Surgery* 54(13):431–435.
- Moran D, Epstein Y, Keren G, Laor A, Sherez J, Shapiro Y (1995) Calculation of mean arterial pressure during exercise as a function of heart rate. *Applied human sciences* 14(6):293–295.
- Murch SD, La Gerche A, Roberts TJ, Prior DL, MacIsaac AI, Burns AT (2015) Abnormal right ventricular relaxation in pulmonary hypertension. *Pulmonary Circulation* 5(2):370–375.
- Nadler SB, Hidalgo JU, Bloch T (1962) Prediction of blood volume in normal human adults. *Surgery* 51:224–232.
- Nagueh SF, Smiseth OA, Dokainish H, Andersen OS, Abudiab MM, Schutt RC, Kumar A, Gude E, Sato K, Harb SC, Klein AL (2018) Mean right atrial pressure for estimation of left ventricular filling pressure in patients with normal left ventricular ejection fraction: invasive and noninvasive validation. *Journal of The American Society of Echocardiography* 31:799–806.
- Natarajan AR, Eisner GM, Armando I, Browning S, Pezzullo JC, Rhee L, Dajani M, Carey RM, Jose PA (2016) The renin-angiotensin and renal dopaminergic systems interact in normotensive humans. *Journal of the American Society of Nephrology* 27:265–279.
- Neal CR, Arkill KP, Bell JS, Betteridge KB, Bates DO, Winlove CP, Salmon AHJ, Harper SJ (2018) Novel hemodynamic structures in the human glomerulus. *American Journal of Physiology-Renal Physiology* 315(5):F1370–F1384.
- Nedogoda SV, Ledyeva AA, Chumachok EV, Tsoma VV, Mazina G, Salasyuk AS, Barykina IN (2013) Randomized trial of perindopril, enalapril, losartan and telmisartan in overweight or obese patients with hypertension. *Clinical Drug Investigation* 33(8):553–561.
- Nguyen MK, Kurtz I (2003) Are the total exchangeable sodium, total exchangeable potassium and total body water the only determinants of the plasma water sodium concentration? *Nephrology Dialysis Transplantation* 18:1266–1271.
- Nozaki M, Mouri T, Itoi K, Takahashi K, Totsune K, Saito T, Yoshinaga K (1986) Plasma concentrations of atrial natriuretic peptide in various diseases. *The Tohoku Journal of Experimental Medicine* 148:439–447.
- Nussberger J, Brunner D, Keller I, Brunner HR (1992) Measurement of converting enzyme activity by antibody-trapping of generated angiotensin II. Comparison with two other methods. *American journal of hypertension* 5:393–398.
- Oparil S, Acelajado MC, Bakris GL, Berlowitz DR, Cífková R, Dominiczak AF, Grassi G, Jordan J, Poulter NR, Rodgers A, Whelton PK (2018) Hypertension. *Nature Reviews Disease Primers* 4:18014.
- Opitz CF, Wensel R, Bettmann M, Schaffarczyk R, Linscheid M, Hetzer R, Ewert R (2003) Assessment of the vasodilator response in primary pulmonary hypertension. Comparing prostacyclin and iloprost administered by either infusion or inhalation. *European Heart Journal* 24:356–365.
- Ostchega Y, Porter KS, Hughes J, Dillon CF, Nwankwo T (2011) Resting pulse rate reference data for children, adolescents, and adults: United States, 1999–2008. *National Health Statistics Reports* 41:1–16.
- Ottesen JT, Olufsen MS, Larsen JK (2004) *Applied mathematical models in human physiology*. Philadelphia: SIAM, 298 p.

- Otto CM, Pearlman AS, Kraft CD, Miyake-Hull CY, Burwash IG, Gardner CJ (1992) Physiologic changes with maximal exercise in asymptomatic valvular aortic stenosis assessed by Doppler echocardiography. *Journal of the American College of Cardiology* 20(5):1160–1167.
- Pacifico AD, Digerness S, Kirklin JW (1970) Acute alterations of body composition after open intracardiac operations. *Circulation* 41:331–341.
- Paeme S, Moorhead KT, Chase JG, Lambermont B, Kolh P, D'orio V, Pierard L, Moonen M, Lancellotti P, Dauby PC, Desaive T (2011) Mathematical multi-scale model of the cardiovascular system including mitral valve dynamics. Application to ischemic mitral insufficiency. *BioMedical Engineering OnLine* 10:86.
- Pagani ED, Alousi AA, Grant AM, Older TM, Dziuban SWJr, Allen PD (1988) Changes in myofibrillar content and Mg-ATPase activity in ventricular tissues from patients with heart failure caused by coronary artery disease, cardiomyopathy, or mitral valve insufficiency. *Circulation Research* 63(2):380–385.
- Palmer LG, Schnermann J (2015) Integrated control of Na transport along the nephron. *Clinical Journal of the American Society of Nephrology* 10(4):676–687.
- Papaioannou TG, Protogerou AD, Stergiopoulos N, Vardoulis O, Stefanadis C, Safar M, Blacher J (2014) Total arterial compliance estimated by a novel method and all-cause mortality in the elderly: the PROTEGER study. *Age* 36:1555–1563.
- Payne RB, Levell MJ (1968) Redefinition of the normal range for serum sodium. *Clinical chemistry* 14(2):172–178.
- Perschel FH, Schemer R, Seiler L, Reincke M, Deinum J, Maser-Gluth C, Mechelhoff D, Tauber R, Diederich S (2004) Rapid screening test for primary hyperaldosteronism: ratio of plasma aldosterone to renin concentration determined by fully automated chemiluminescence immunoassays. *Clinical Chemistry* 50(9):1650–1655.
- Petty WJ, Miller AA, McCoy TP, Gallagher PE, Tallant EA, Torti FM (2009) Phase I and pharmacokinetic study of angiotensin-(1-7), an endogenous antiangiogenic hormone. *Clinical Cancer Research* 15(23):7398–7404.
- Pfisterer ME, Battler A, Zaret BL (1985) Range of normal values for left and right ventricular ejection fraction at rest and during exercise assessed by radionuclide angiocardiology. *European Heart Journal* 6:647–655.
- Pichler GP, Amouzadeh-Ghadikolai O, Leis A, Skrabal F (2013) A critical analysis of whole body bioimpedance spectroscopy (BIS) for the estimation of body compartments in health and disease. *Medical Engineering and Physics* 35:616–625.
- Porthan K, Viitasalo M, Hiltunen TP, Väänänen H, Dabek J, Suonsyrjä T, Hannila-Handelberg T, Virolainen J, Nieminen MS, Toivonen L, Kontula K, Oikarinen L (2009) Short-term electrophysiological effects of losartan, bisoprolol, amlodipine, and hydrochlorothiazide in hypertensive men. *Annals of Medicine* 41(1):29–37.
- Pralong WF, Hunyady L, Várnai P, Wollheim CB, Spät A (1992) Pyridine nucleotide redox state parallels production of aldosterone in potassium-stimulated adrenal glomerulosa cells. *Proceedings of the National Academy of Sciences of the United States of America* 89:132–136.
- Prentice TC, Siri W, Berlin NI, Hyde GM, Parsons RJ, Joiner EE, Lawrence JH (1952) Studies of total body water with tritium. *Journal of Clinical Investigation* 31(4):412–418.
- Proshin AP, Solodyannikov YuV (2006) Mathematical modeling of blood circulation system and its practical application. *Automation and Remote Control* 67(2): 329–341.
- Pruett WA, Clemmer JS, Hester RL (2016) Validation of an integrative mathematical model of dehydration and rehydration in virtual humans. *Physiological Reports* 4(22):e13015.

- Prys-Roberts C, Meloche R, Foëx P (1971) Studies of anaesthesia in relation to hypertension. I. Cardiovascular responses of treated and untreated patients. *British Journal of Anaesthesia* 43:122–137.
- Raimann JG, Zhu F, Wang J, Thijssen S, Kuhlmann MK, Kotanko P, Levin NW, Kaysen GA (2013) Comparison of fluid volume estimates in chronic hemodialysis patients by bioimpedance, direct isotopic, and dilution methods. *Kidney International* 85:898–908.
- Rastegar A (1990) Serum Potassium. In: *Clinical methods: The history, physical, and laboratory examinations*. 3rd edition. Editors: Walker HK, Hall WD, Hurst JW. Boston: Butterworths.
- Ratwatt S, Anderson J, Strange G, Corrigan C, Collins N, Celermajer DS, Dwyer N, Feenstra J, Keating D, Kotlyar E, Lavender M, Whitford H, Whyte K, Williams T, Wrobel JP, Keogh A, Lau EM, PHSANZ Registry (2020) Pulmonary arterial hypertension with below threshold pulmonary vascular resistance. *Eur Respir J* 56(1):1901654.
- Reid IA (1996) Angiotensin II and baroreflex control of heart rate. *Physiology* 11(6):270–274.
- Reynolds RM, Padfield PL, Seckl JR (2006) Disorders of sodium balance. *BMJ* 332:702–705.
- Ribeiro-Oliveira AJr, Nogueira AI, Pereira RM, Boas WW, Dos Santos RA, Simões e Silva AC (2008) The renin-angiotensin system and diabetes: an update. *Vascular Health and Risk Management* 4(4):787–803.
- Riegger GA, Liebau G, Kochsiek K (1982) Antidiuretic hormone in congestive heart failure. *Am J Med* 72:49–52.
- Rodgers KE, Oliver J, diZerega GS (2006) Phase I/II dose escalation study of angiotensin 1-7 [A(1-7)] administered before and after chemotherapy in patients with newly diagnosed breast cancer. *Cancer Chemotherapy and Pharmacology* 57:559–568.
- Rosalina TT, Bouwman RA, van Sambeek MRHM, van de Vosse FN, Bovendeerd PHM (2019) A mathematical model to investigate the effects of intravenous fluid administration and fluid loss. *Journal of Biomechanics* 88:4–11.
- Roumelioti ME, Glew RH, Khitan ZJ, Rondon-Berrios H, Argyropoulos CP, Malhotra D, Raj DS, Agaba EI, Rohrscheib M, Murata GH, Shapiro JI, Tzamaloukas AH (2018) Fluid balance concepts in medicine: principles and practice. *World Journal of Nephrology* 7(1):1–28.
- Safar ME, Chau NP, Weiss YA, London GM, Milliez PL (1976) Control of cardiac output in essential hypertension. *The American Journal of Cardiology* 38:332–336.
- Safar ME, London GM (1985) Venous system in essential hypertension. *Clinical Science* 69:497–504.
- Saghiv M, Sagiv M (2017) Response of left ventricular volumes and ejection fraction during different modes of exercise in health and CAD patients. *International Journal of Clinical Cardiology* 1:51–56.
- Schmitt F, Martinez F, Brillet G, Nguyen-Khoa T, Brouard R, Sissmann J, Lacour B, Grunfeld JP (1998) Acute renal effects of AT1-receptor blockade after exogenous angiotensin II infusion in healthy subjects. *Journal of Cardiovascular Pharmacology* 31(2):314–321.
- Seidlerová J, Staessen JA, Maillard M, Nawrot T, Zhang H, Bochud M, Kuznetsova T, Richart T, Van Bortel LM, Struijker-Boudier HA, Manunta P, Burnier M, Fagard R, Filipovský J (2006) Association between arterial properties and renal sodium handling in a general population. *Hypertension* 48:609–615.
- Senzaki H, Chen C-H, Kass DA (1996) Single-beat estimation of end-systolic pressure-volume relation in humans. A new method with the potential for noninvasive application. *Circulation* 94(10):2497–2506.

- Shoucri RM (2013) Ejection fraction and ESPVR. A study from a theoretical perspective. *International Heart Journal* 54:318–327.
- Shoucri RM (2015) End-systolic pressure-volume relation, ejection fraction, and heart failure: theoretical aspect and clinical applications. *Clinical Medicine Insights: Cardiology* 9(S1):111–120.
- Simón MA, Díez J, Prieto J (1991) Abnormal sympathetic and renal response to sodium restriction in compensated cirrhosis. *Gastroenterology* 101:1354–1360.
- Skøtt P, Hother-Nielsen O, Bruun NE, Giese J, Nielsen MD, Beck-Nielsen H, Parving HH (1989) Effects of insulin on kidney function and sodium excretion in healthy subjects. *Diabetologia* 32:694–699.
- Skrabal F, Arnot RN, Joplin GF (1973) Equations for the prediction of normal values for exchangeable sodium, exchangeable potassium, extracellular fluid volume, and total body water. *British Medical Journal* 2:37–38.
- Skrabal F (1974) Half-life of plasma renin activity in normal subjects and in malignant hypertension. *Wiener klinische Wochenschrift* 52:1173–1174.
- Škrtić M, Lytvyn Y, Yang GK, Yip P, Lai V, Silverman M, Cherney DZ (2015) Glomerular haemodynamic profile of patients with Type 1 diabetes compared with healthy control subjects. *Diabetic medicine* 32:972–979.
- Smilde TDJ, Damman K, van der Harst P, Navis G, Westenbrink BD, Voors AA, Boomsma F, van Veldhuisen DJ, Hillege HL (2009) Differential associations between renal function and "modifiable" risk factors in patients with chronic heart failure. *Clinical Research in Cardiology* 98:121–129.
- Smith D, Engel B, Diskin AM, Spanel P, Davies SJ (2002) Comparative measurements of total body water in healthy volunteers by online breath deuterium measurement and other near-subject methods. *The American Journal of Clinical Nutrition* 76:1295–1301.
- Sobol BJ, Kessler RH, Rader B, Eichna LW (1959) Cardiac, hemodynamic and renal functions in congestive heart failure during induced peripheral vasodilatation; relationship to Starling's law of the heart in man. *Journal of Clinical Investigation* 38(3):557–578.
- Solodyannikov YuV (1994) Elements of mathematical modeling and identification of blood circulation system. Samara: Samara University, 316 p. (In Russ.)
- Sperry BW, Campbell J, Yanavitski M, Kapadia S, Tang WHW, Hanna M (2017) Peripheral venous pressure measurements in patients with acute decompensated heart failure (PVP-HF). *Circulation: Heart Failure* 10:e004130.
- Stefanadis C, Manolis A, Dernellis J, Tsioufis C, Tsiamis E, Gavras I, Gavras H, Toutouzas P (2001) Acute effect of clonidine on left ventricular pressure-volume relation in hypertensive patients with diastolic heart dysfunction. *Journal of Human Hypertension* 15:635–642.
- Stellbrink C, Breithardt OA, Franke A, Sack S, Bakker P, Auricchio A, Pochet T, Salo R, Kramer A, Spinelli J, PATH-CHF Investigators, CPI Guidant Congestive Heart Failure Research Group (2001) Impact of cardiac resynchronization therapy using hemodynamically optimized pacing on left ventricular remodeling in patients with congestive heart failure and ventricular conduction disturbances. *J Am Coll Cardiol* 38(7):1957–1965.
- Suga H, Sagawa K, Shoukas AA (1973) Load independence of the instantaneous pressure-volume ratio of the canine left ventricle and effects of epinephrine and heart rate on the ratio. *Circulation Research* 32: 314–322.
- Surveyor I (1969) Sodium, potassium and water metabolism in myxedema. *Postgraduate Medical Journal* 45:659–663.

- Suzuki M, Utida H, Yamaguchi Y, Yamamoto H, Sakai S, Sakai O (1991) A case with renal tubular damage: differentiation of Na reabsorption function by lithium clearance. *Japanese Journal of Medicine* 30(4):363–366.
- Tarazi RC, Dustan HP, Frohlich ED (1969) Relation of plasma to interstitial fluid volume in essential hypertension. *Circulation* 40:357–366.
- Thenappan T, Prins KW, Pritzker MR, Scandurra J, Volmers K, Weir EK (2016) The critical role of pulmonary arterial compliance in pulmonary hypertension. *Annals of the American Thoracic Society* 13(2):276–284.
- Tkacova R, Hall MJ, Liu PP, Fitzgerald FS, Bradley TD (1997) Left ventricular volume in patients with heart failure and Cheyne-Stokes respiration during sleep. *Am J Respir Crit Care Med* 156:1549–1555.
- Treacher DF, Leach RM (1998) Oxygen transport – 1. Basic principles. *BMJ* 317:1302–1306.
- Trip P, Kind T, van de Veerdonk MC, Marcus JT, de Man FS, Westerhof N, Vonk-Noordegraaf A (2013) Accurate assessment of load-independent right ventricular systolic function in patients with pulmonary hypertension. *The Journal of Heart and Lung Transplantation* 32:50–55.
- Tsuda A, Ishimura E, Uedono H, Ochi A, Nakatani S, Morioka T, Mori K, Uchida J, Emoto M, Nakatani T, Inaba M (2018) Association of Albuminuria With Intraglomerular Hydrostatic Pressure and Insulin Resistance in Subjects With Impaired Fasting Glucose and/or Impaired Glucose Tolerance. *Diabetes Care* 41(11):2414–2420.
- Tu W, Eckert GJ, Pratt JH, Jan Danser AH (2012) Plasma levels of prorenin and renin in blacks and whites: their relative abundance and associations with plasma aldosterone concentration. *American Journal of Hypertension* 25(9):1030–1034.
- Uttamsingh RJ, Leaning MS, Bushman JA, Carson ER, Finkelstein L (1985) Mathematical model of the human renal system. *Medical and Biological Engineering and Computing* 23:525–535.
- Valabhji J, Donovan J, Kyd PA, Schachter M, Elkeles RS (2001) The relationship between active renin concentration and plasma renin activity in Type 1 diabetes. *Diabetic medicine* 18:451–458.
- van der Bel R, Coolen BF, Nederveen AJ, Potters WV, Verberne HJ, Vogt L, Stroes ES, Krediet CT (2016) Magnetic resonance imaging-derived renal oxygenation and perfusion during continuous, steady-state angiotensin-II infusion in healthy humans. *Journal of the American Heart Association* 5:e003185.
- van Straten A, Vliegen HW, Lamb HJ, Roes SD, van der Wall EE, Hazekamp MG, de Roos A (2005) Time course of diastolic and systolic function improvement after pulmonary valve replacement in adult patients with tetralogy of Fallot. *Journal of the American College of Cardiology* 46(8):1559–1564.
- Walser M, Duffy BJJr, Griffith HW (1956) Body fluids in hypertension and mild heart failure. *Journal of the American Medical Association* 160(10):858–864.
- Wambach G, Götz S, Suckau G, Bönner G, Kaufmann W (1987) Plasma levels of atrial natriuretic peptide are raised in essential hypertension during low and high sodium intake. *Wiener klinische Wochenschrift* 65:232–237.
- Wang H, Weng C, Chen H (2017) Positive association between KCNJ5 rs2604204 (A/C) polymorphism and plasma aldosterone levels, but also plasma renin and angiotensin I and II levels, in newly diagnosed hypertensive Chinese: a case-control study. *Journal of Human Hypertension* 31(7):457–461.
- Wei CM, Heublein DM, Perrella MA, Lerman A, Rodeheffer RJ, McGregor CG, Edwards WD, Schaff HV, Burnett JrJC (1993) Natriuretic peptide system in human heart failure. *Circulation* 88:1004–1009.

- Wennesland R, Brown E, Hopper JJr, Hodges JJJr, Guttentag OE, Scott KG, Tucker IN, Bradley B (1959) Red cell, plasma and blood volume in healthy men measured by radiochromium (Cr51) cell tagging and hematocrit: influence of age, somatotype and habits of physical activity on the variance after regression of volumes to height and weight combined. *Journal of Clinical Investigation* 38(7):1065–1077.
- Widya RL, van der Meer RW, Smit JW, Rijzewijk LJ, Diamant M, Bax JJ, de Roos A, Lamb HJ (2013) Right ventricular involvement in diabetic cardiomyopathy. *Diabetes Care* 36:457–462.
- Willassen Y, Ofstad J (1980) Renal sodium excretion and the peritubular capillary physical factors in essential hypertension. *Hypertension* 2(6):771–779.
- Wong F, Massie D, Hsu P, Dudley F (1994) Renal response to a saline load in well-compensated alcoholic cirrhosis. *Hepatology* 20:873–881.
- Wright SP, Moayedi Y, Foroutan F, Agarwal S, Paradero G, Alba AC, Baumwol J, Mak S (2017) Diastolic pressure difference to classify pulmonary hypertension in the assessment of heart transplant candidates. *Circ Heart Fail* 10:e004077.
- Wright SP, Opotowsky AR, Buchan TA, Esfandiari S, Granton JT, Goodman JM, Mak S (2018) Flow-related right ventricular to pulmonary arterial pressure gradients during exercise. *Cardiovascular Research* 115(1):222–229.
- Yarmohammadi H, Erinjeri JP, Brown KT (2015) Embolization of metastatic neuroendocrine tumor resulting in clinical manifestations of syndrome of inappropriate secretion of antidiuretic hormone. *Journal of Vascular and Interventional Radiology* 26:533–537.
- Zhang W, Kovács SJ (2008) The diastatic pressure-volume relationship is not the same as the end-diastolic pressure-volume relationship. *American Journal of Physiology-Heart and Circulatory Physiology* 294: H2750–H2760.
- Zhang J, Chen J, Cheong B, Pednekar A, Muthupillai R (2019) High frame rate cardiac cine MRI for the evaluation of diastolic function and its direct correlation with echocardiography. *Journal of Magnetic Resonance Imaging* 50(5):1571–1582.
- Ziegler MG (2018) Atherosclerosis and blood pressure variability. *Hypertension* 71:403–405.
- Zullo MA (2002) Characteristics of the acute rise of atrial natriuretic factor during ventricular pacing. *CHEST* 121:1942–1946.
